# Supplementary material for: Polymer supported synthesis of novel benzoxazole linked benzimidazoles under microwave conditions: In vitro evaluation of VEGFR-3 kinase inhibition activity
Source: Royal Society of Chemistry journal article supplement (doi:10.1039/c0ob00547a), 2010-12-06

## *Supporting Information*

### **Polymer supported synthesis of novel benzoxazole linked benzimidazoles under microwave conditions: *In vitro* evaluation of VEGFR-3 kinase inhibition activity**

*Kaushik Chanda,<sup>†</sup> Barnali Maiti,<sup>†</sup> Gorakh S. Yellol,<sup>†</sup> Ming-Hsien Chien,<sup>‡</sup>  
Min-Liang Kuo,<sup>‡</sup> and Chung-Ming Sun<sup>\*†</sup>*

*Department of Applied Chemistry, National Chiao Tung University, Hsinchu  
300-10, Taiwan, and Institute of Toxicology, National Taiwan University,  
Taipei 100, Taiwan*

*Email: [cmsun@mail.nctu.edu.tw](mailto:cmsun@mail.nctu.edu.tw)*

## Contents

|                                                                                                 |           |
|-------------------------------------------------------------------------------------------------|-----------|
| General Methods                                                                                 | S3        |
| Spectral Data for polymer supported intermediates 9a-14a                                        | S4-S6     |
| Copies of $^1\text{H}$ NMR and $^{13}\text{C}$ NMR of Compounds 15a- 15p                        | S7-S38    |
| Copies of HPLC Spectra of Compounds 15a- 15p                                                    | S39-S54   |
| Copies of LR and HR Mass Spectra of Compound.15a- 15p                                           | S55-S86   |
| Copies of IR Spectra of Compounds 15a- 15p                                                      | S87-S102  |
| $^1\text{H}$ , $^{13}\text{C}$ and Mass Data of Intermediate 'a'                                | S103      |
| Copies of $^1\text{H}$ NMR and $^{13}\text{C}$ NMR of Intermediate 'a'                          | S104-105  |
| Elemental Analysis of Compound 15n                                                              | S106-S107 |
| X-Ray Crystallographic data of Compound 15n                                                     | S108-S119 |
| $^{19}\text{F}$ NMR Spectra of Compound 15d and 15e                                             | S120-S121 |
| Copies of $^1\text{H}$ NMR spectrum of Intermediates 9a-14a                                     | S122-S126 |
| Copies of $^1\text{H}$ NMR spectrum of Intermediates 9f-14f                                     | S127-S131 |
| Copies of $^1\text{H}$ NMR spectrum of Intermediates 9n-14n                                     | S132-S136 |
| Microwave data (Time vs. pressure, temperature, power graphs) for synthesis of compound 11a-14a | S137-S140 |

## General Methods

Dichloromethane was distilled from calcium hydride before use. All reactions were performed under an inert atmosphere with unpurified reagents and dry solvents. Analytical thin-layer chromatography (TLC) was performed using 0.25 mm silica gel-coated Kieselgel 60 F254 plates. All the microwave experiments were conducted in Biotage initiator under optimized reaction condition of power and pressure. Flash chromatography was performed using the indicated solvent and silica gel 60 (Merck, 230-400 mesh).  $^1\text{H}$  NMR (300 MHz) and  $^{13}\text{C}$  NMR (75 MHz) spectra were recorded on a Bruker DX-300 spectrometer. Chemical shifts are reported in parts per million (ppm) on the  $\delta$  scale from an internal standard. High-resolution mass spectra (HRMS) were recorded on a JEOL TMS-HX 110 mass spectrometer. PEG was purchased from SHOWA.

## Spectral data of polymer supported intermediates:

### Polymer bound 3-amino-(4-isobutylamino) benzene carboxylates 9a.

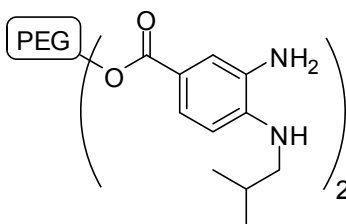

$^1\text{H}$  NMR (300 MHz,  $\text{CDCl}_3$ )  $\delta$  7.58 (d,  $J = 8.5$  Hz, 1H), 7.42 (s, 1H), 6.55 (d,  $J = 8.5$  Hz, 1H), 4.40 (t,  $J = 6.5$  Hz, 2H), 3.89-3.40 (m, PEG), 2.98 (d,  $J = 6.2$  Hz, 2H), 1.94 (sext,  $J = 6.2$  Hz, 1H), 1.01 (d,  $J = 6.2$  Hz, 6H).

### Polymer bound 3-(4-Hydroxy-3-nitrobenzamido)-4-(isobutylamino) carboxylates

#### 11a.

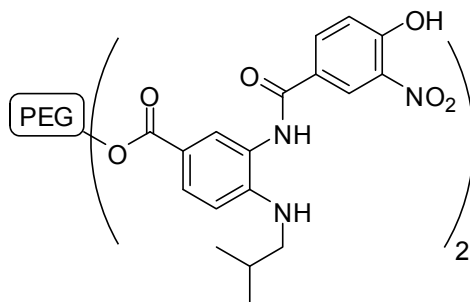

$^1\text{H}$  NMR (300 MHz,  $\text{CDCl}_3$ )  $\delta$  9.18 (s, NH), 8.79 (s, 1H), 8.22 (d,  $J = 8.4$  Hz, 1H), 7.79-7.70 (m, 2H), 7.10 (d,  $J = 8.4$  Hz, 1H), 6.56 (d,  $J = 8.7$  Hz, 1H), 5.11 (s, NH), 4.26 (t,  $J = 6.9$  Hz, 2H), 3.87-3.20 (m, PEG), 1.81 (sext,  $J = 6.5$  Hz, 1H), 1.01 (d,  $J = 6.5$  Hz, 6H).

### 2-(4-Hydroxy-3-nitrophenyl)-1-isobutyl-1H-benzo[d]imidazole carboxylates 12a.

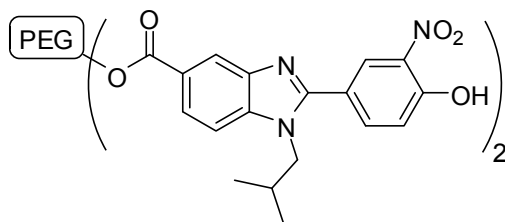

$^1\text{H}$  NMR (300 MHz,  $\text{CDCl}_3$ )  $\delta$  8.38 (s, 1H), 8.35 (m, 1H), 7.94 (d,  $J = 8.7$  Hz, 1H), 7.86 (d,  $J = 8.6$  Hz, 1H), 7.37 (d,  $J = 8.7$  Hz, 1H), 7.23 (d,  $J = 8.6$  Hz, 1H), 4.36 (d,  $J = 6.2$  Hz, 2H), 4.01 (d,  $J = 6.6$  Hz, 2H), 3.74-3.25 (m, PEG), 1.99 (m, 1H), 0.69 (d,  $J = 6.6$  Hz, 6H).

**Polymer bound 2-(3-Amino-4-hydroxyphenyl)-1-isobutyl-1H-benzo[d]imidazole carboxylates 13a.**

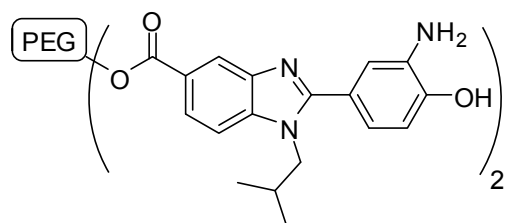

$^1\text{H}$  NMR (300 MHz,  $\text{CDCl}_3$ )  $\delta$  8.40 (s, 1H), 7.96 (d,  $J = 8.5$  Hz, 1H), 7.39 (d,  $J = 8.4$  Hz, 1H), 6.97 (s, 1H), 6.92 (d,  $J = 8.5$  Hz, 1H), 6.80 (m, 1H), 4.47-4.37 (m, 2H), 4.08 (d,  $J = 6.2$  Hz, 2H), 3.99-3.39 (m, PEG), 2.01 (m, 1H), 0.70 (d,  $J = 6.5$  Hz, 6H).

**Polymer bound 1-Isobutyl-2-(2-(phenylamino)benzo[d]oxazol-5-yl)-1H-benzo[d]imidazole-carboxylate 14a.**

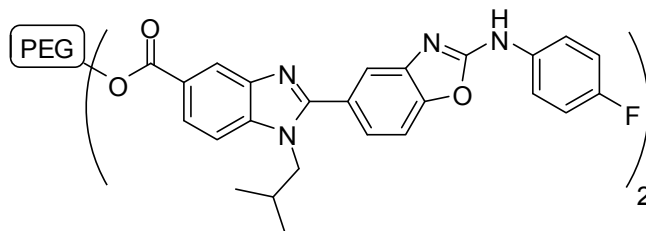

$^1\text{H}$  NMR (300 MHz,  $\text{CDCl}_3$ )  $\delta$  8.75 (s, NH), 8.50 (d,  $J = 1.5$  Hz, 1H), 8.08-7.99 (m, 2H), 7.72-7.60 (m, 2H), 7.55 (d,  $J = 8.3$  Hz, 1H), 7.43-7.42 (m, 4H), 7.05 (t,  $J = 7.4$  Hz, 1H), 4.54-4.50 (m, 2H), 4.12 (d,  $J = 6.2$  Hz, 2H), 3.91-3.36 (m, PEG), 2.19 (m, 1H), 0.77 (d,  $J = 6.5$  Hz, 6H).

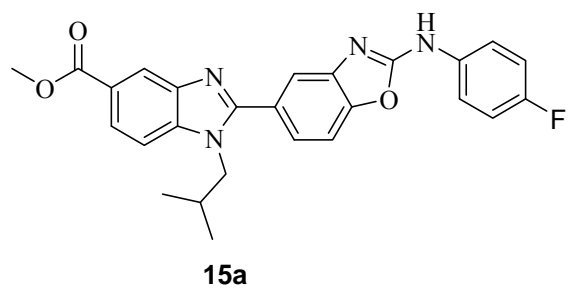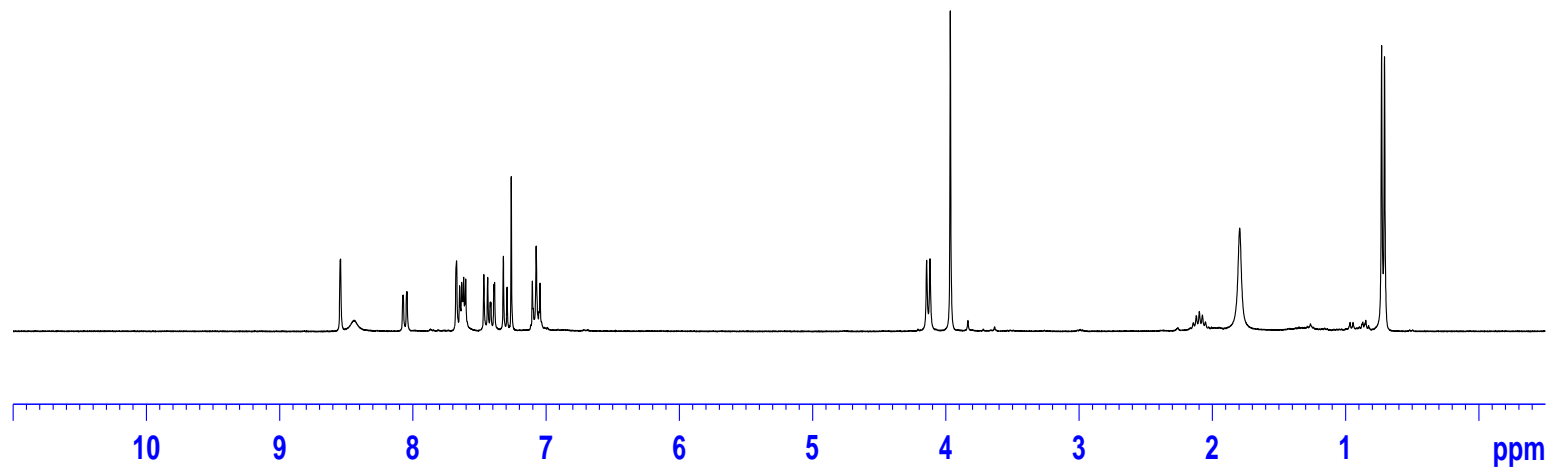

$^1\text{H}$ NMR spectrum (300 MHz) of compound 15a in  $\text{CDCl}_3$

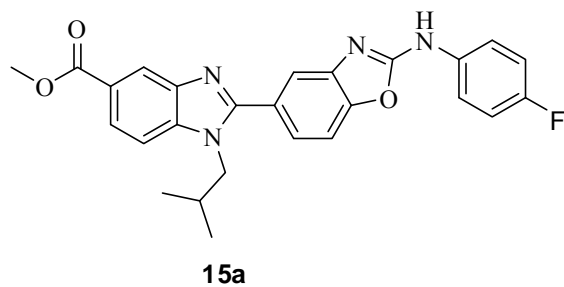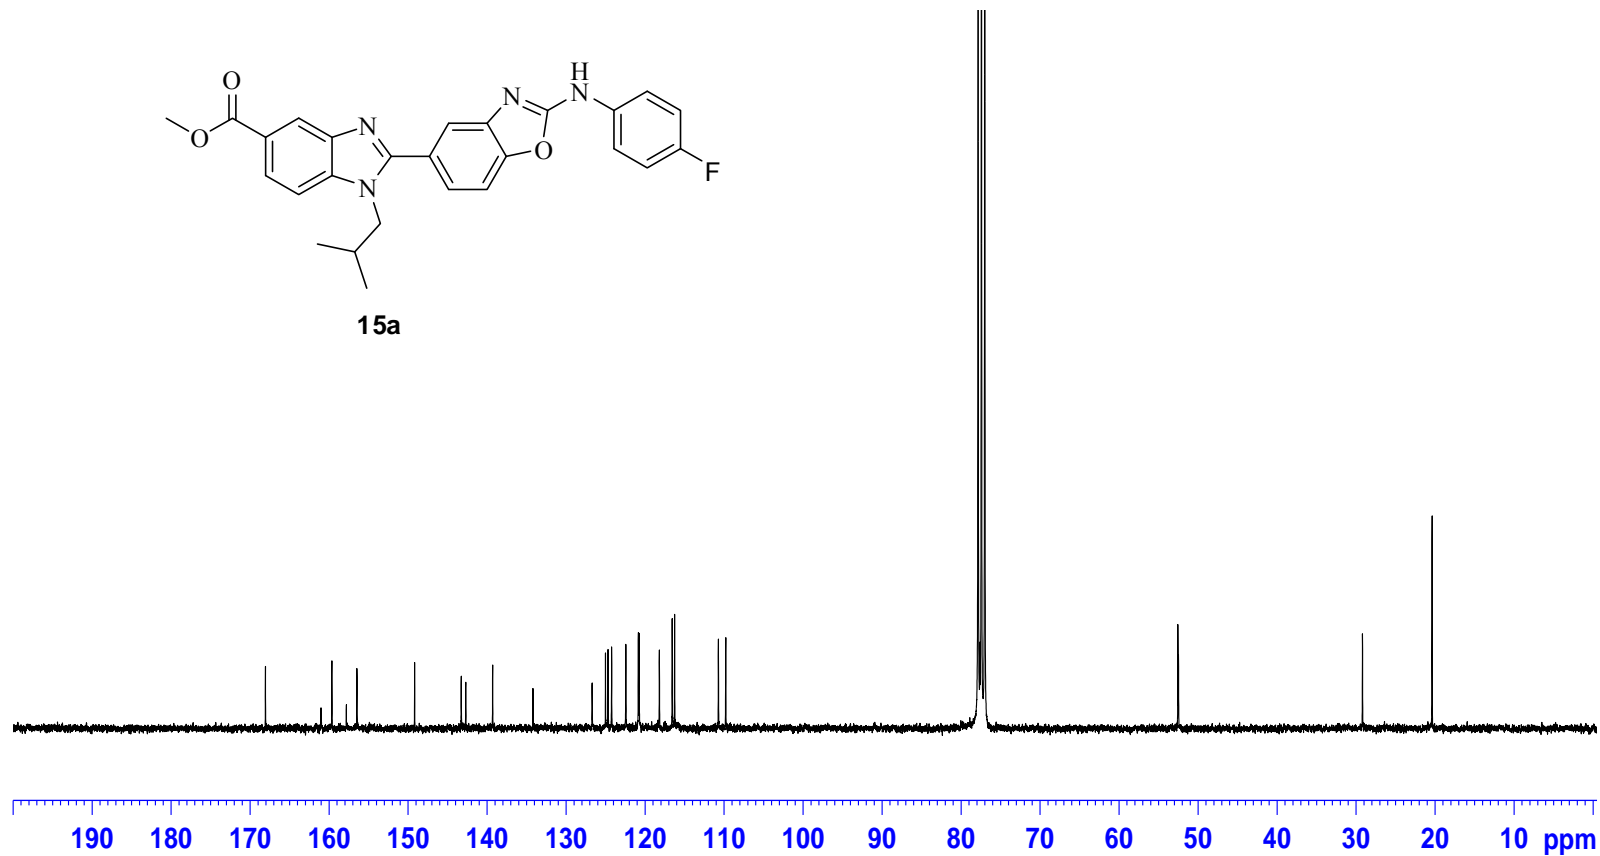

$^{13}\text{C}$  NMR spectrum (75 MHz) of compound 15a in  $\text{CDCl}_3$



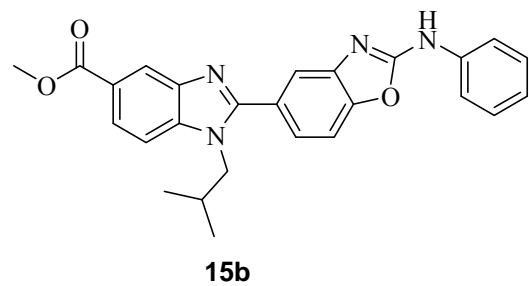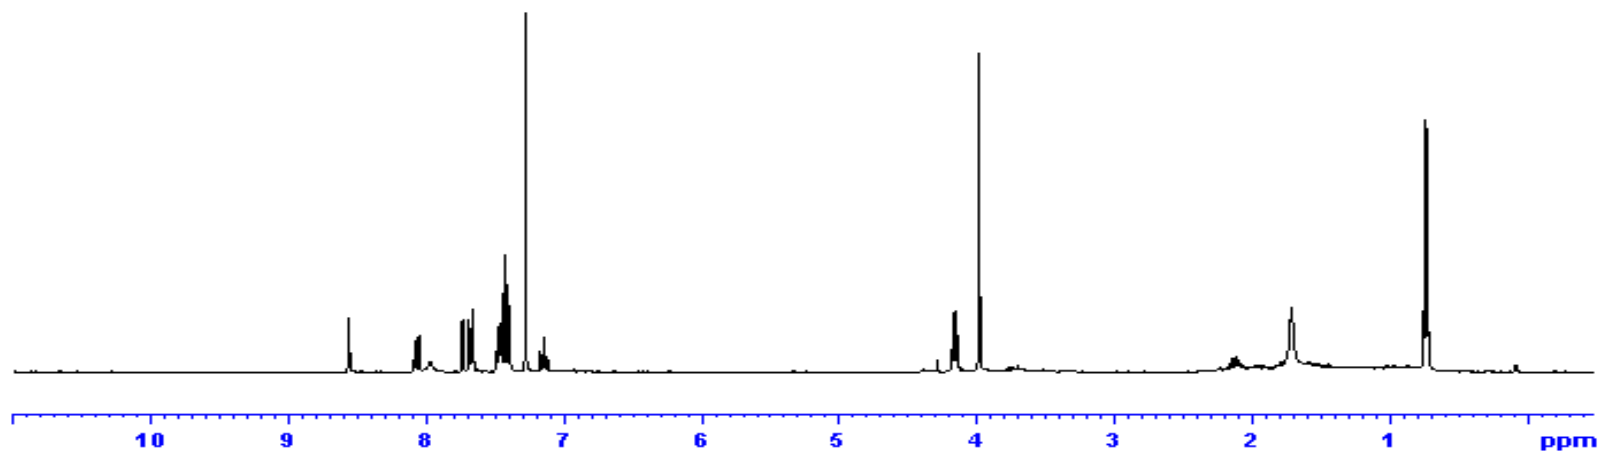

**<sup>1</sup>H NMR spectrum (300 MHz) of compound 15b in CDCl<sub>3</sub>**

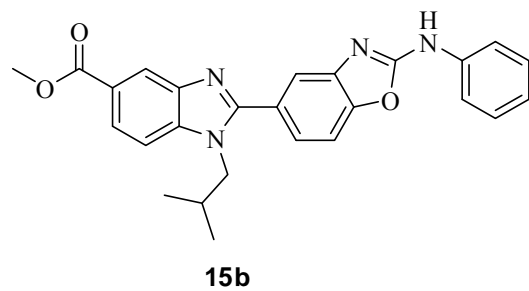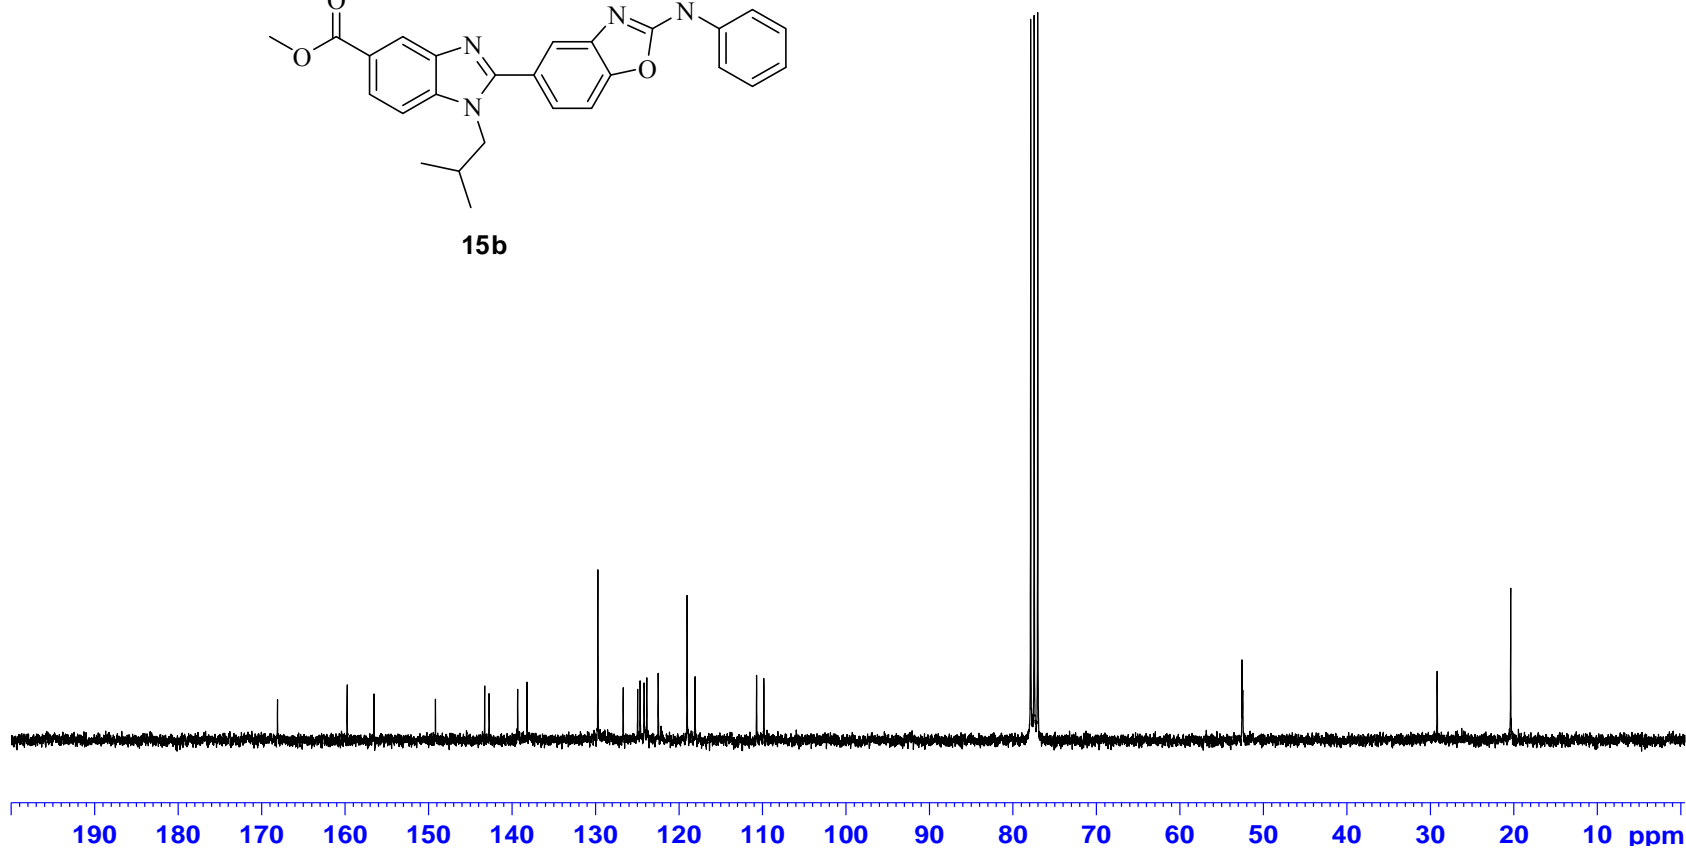

<sup>13</sup>C NMR spectrum (75 MHz) of compound 15b in CDCl<sub>3</sub>

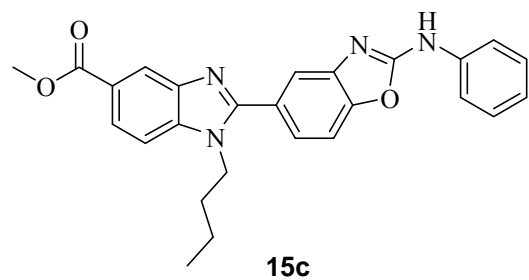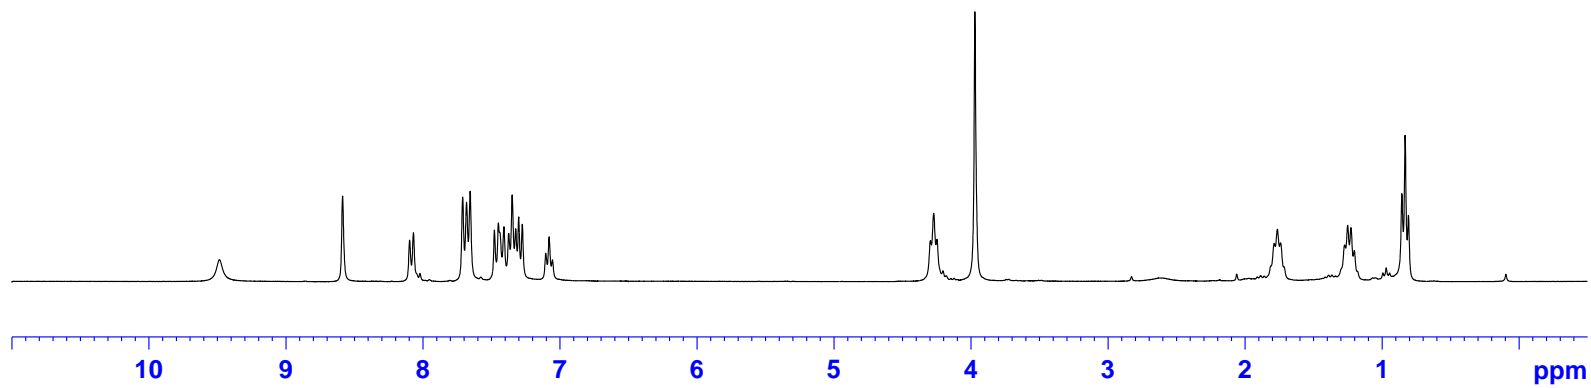

**<sup>1</sup>H NMR spectrum (300 MHz) of compound 15c in CDCl<sub>3</sub>**

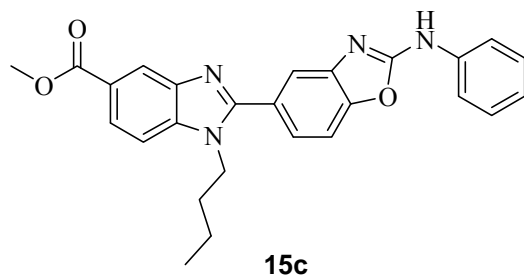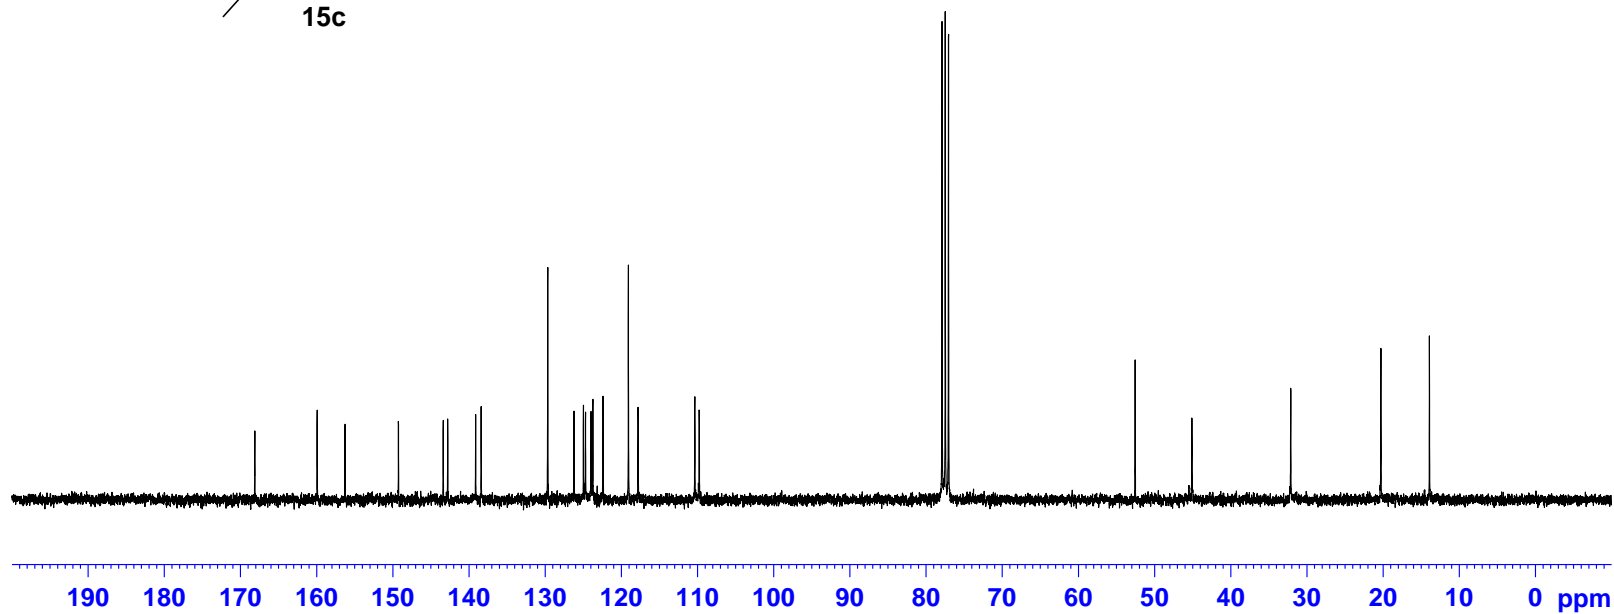

<sup>13</sup>C NMR spectrum (75 MHz) of compound 15c in CDCl<sub>3</sub>

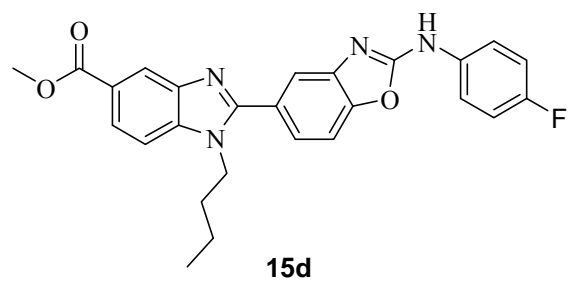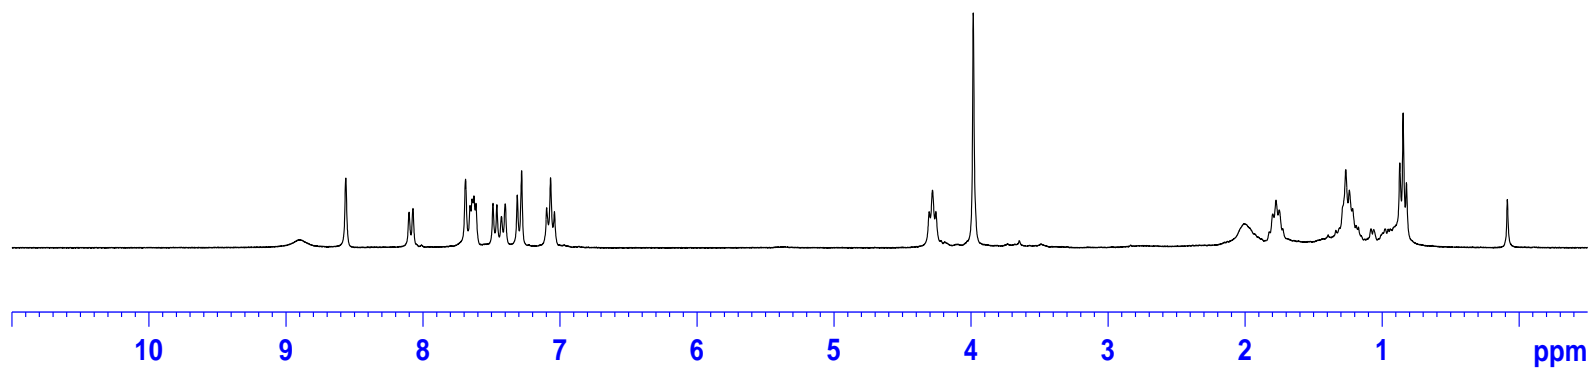

**$^1\text{H}$ NMR spectrum (300 MHz) of compound 15d in  $\text{CDCl}_3$**

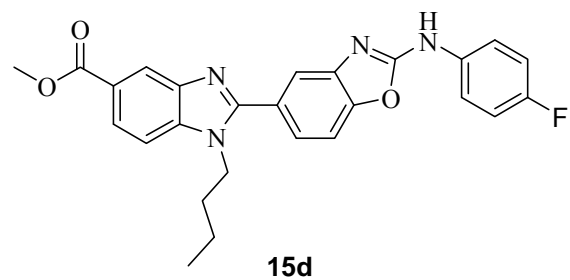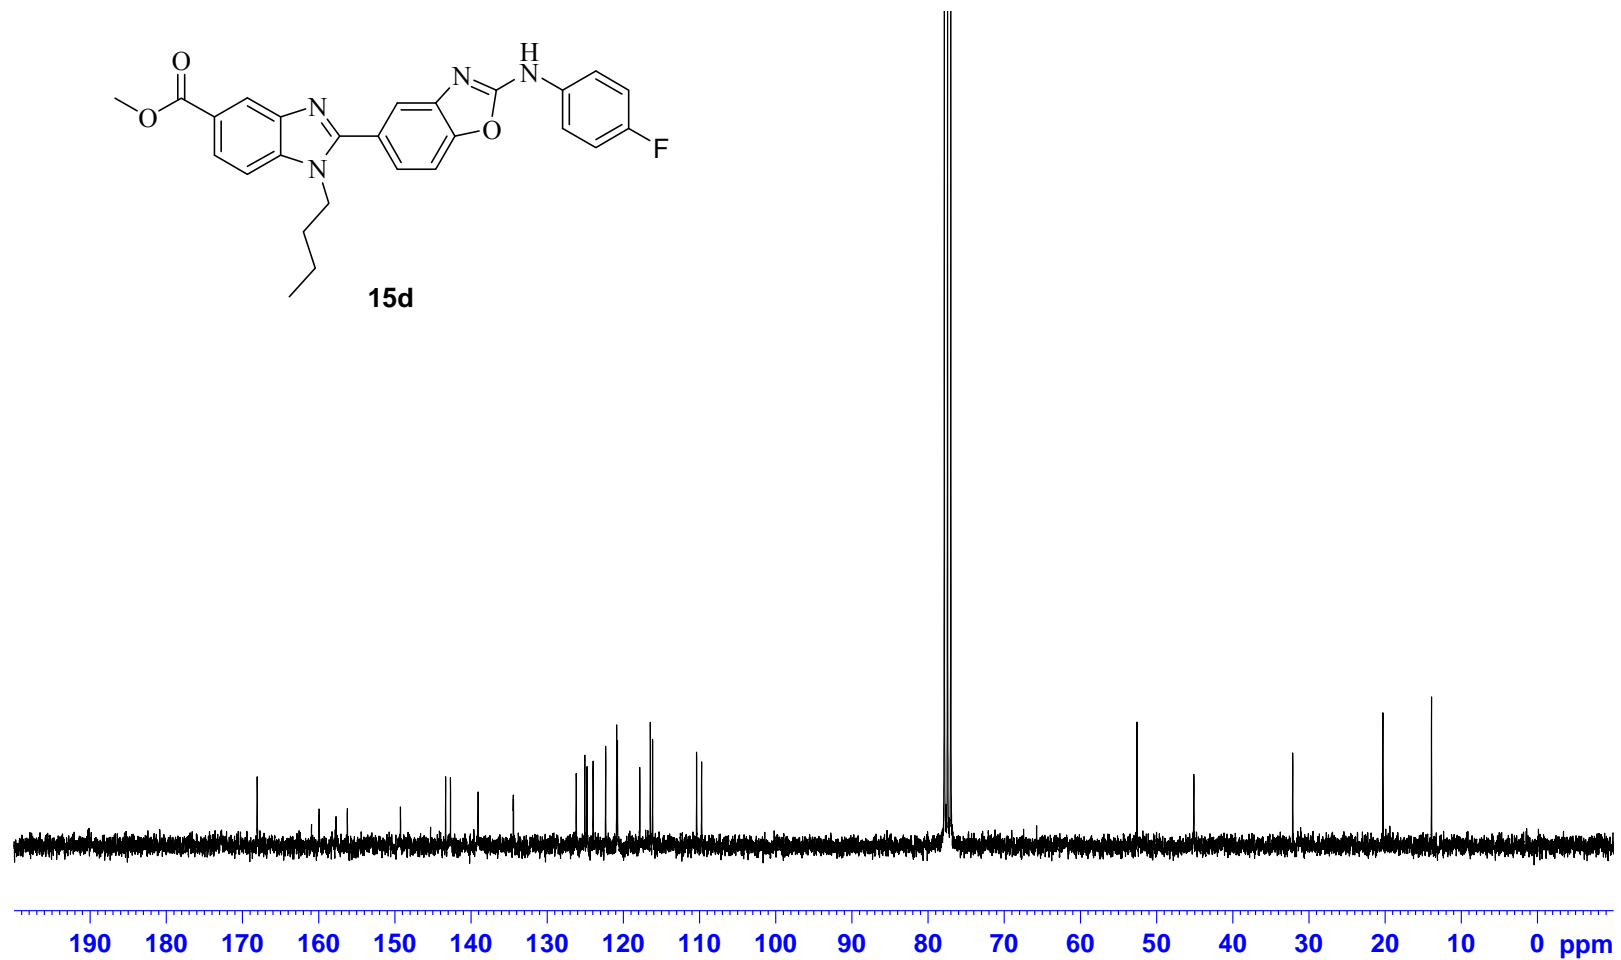

<sup>13</sup>C NMR spectrum (75 MHz) of compound 15d in CDCl<sub>3</sub>

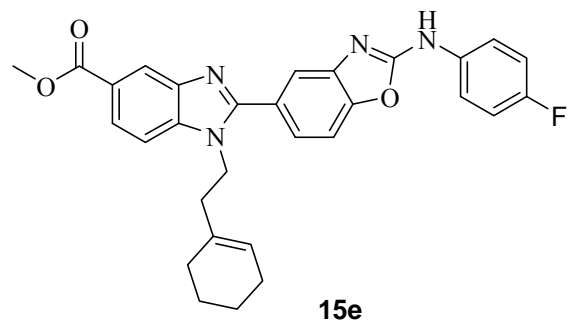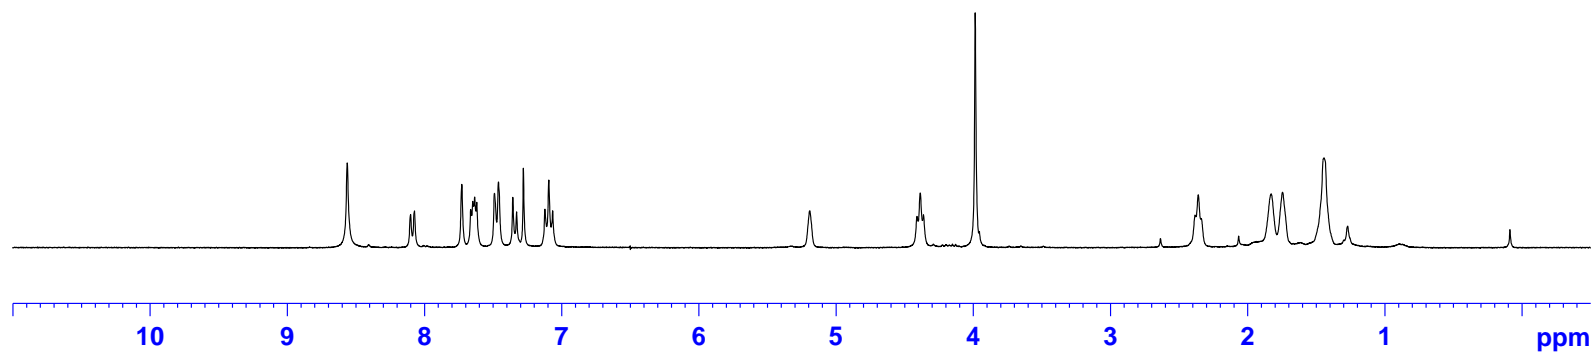

**<sup>1</sup>H NMR spectrum (300 MHz) of compound 15e in CDCl<sub>3</sub>**

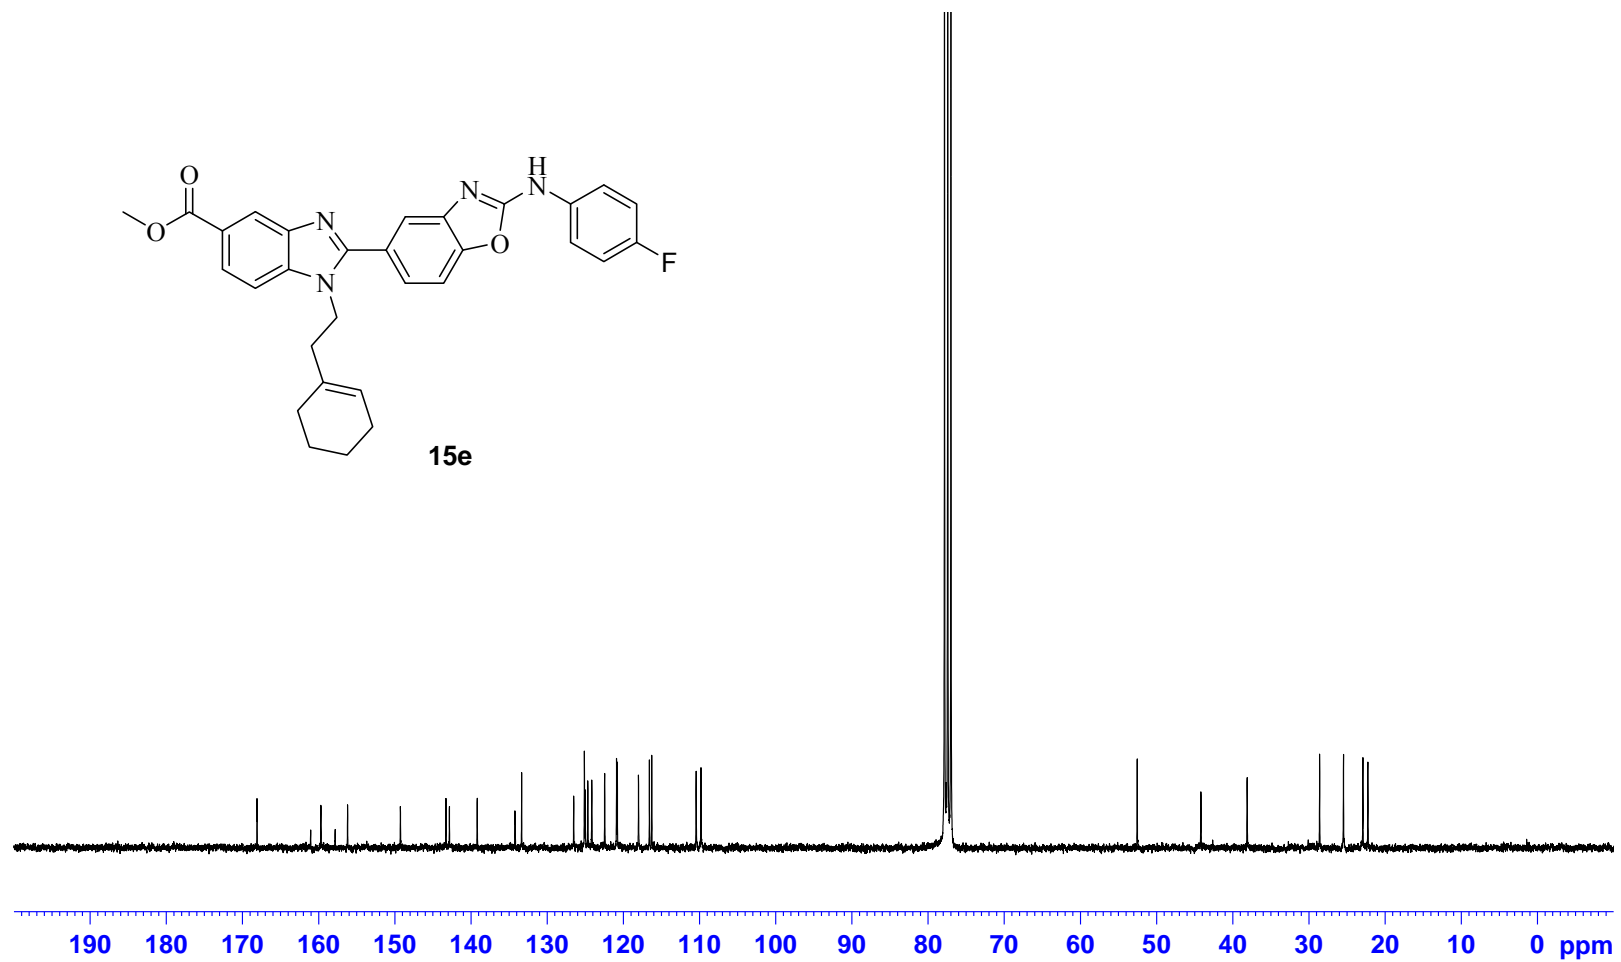

<sup>13</sup>C NMR spectrum (75 MHz) of compound 15e in CDCl<sub>3</sub>



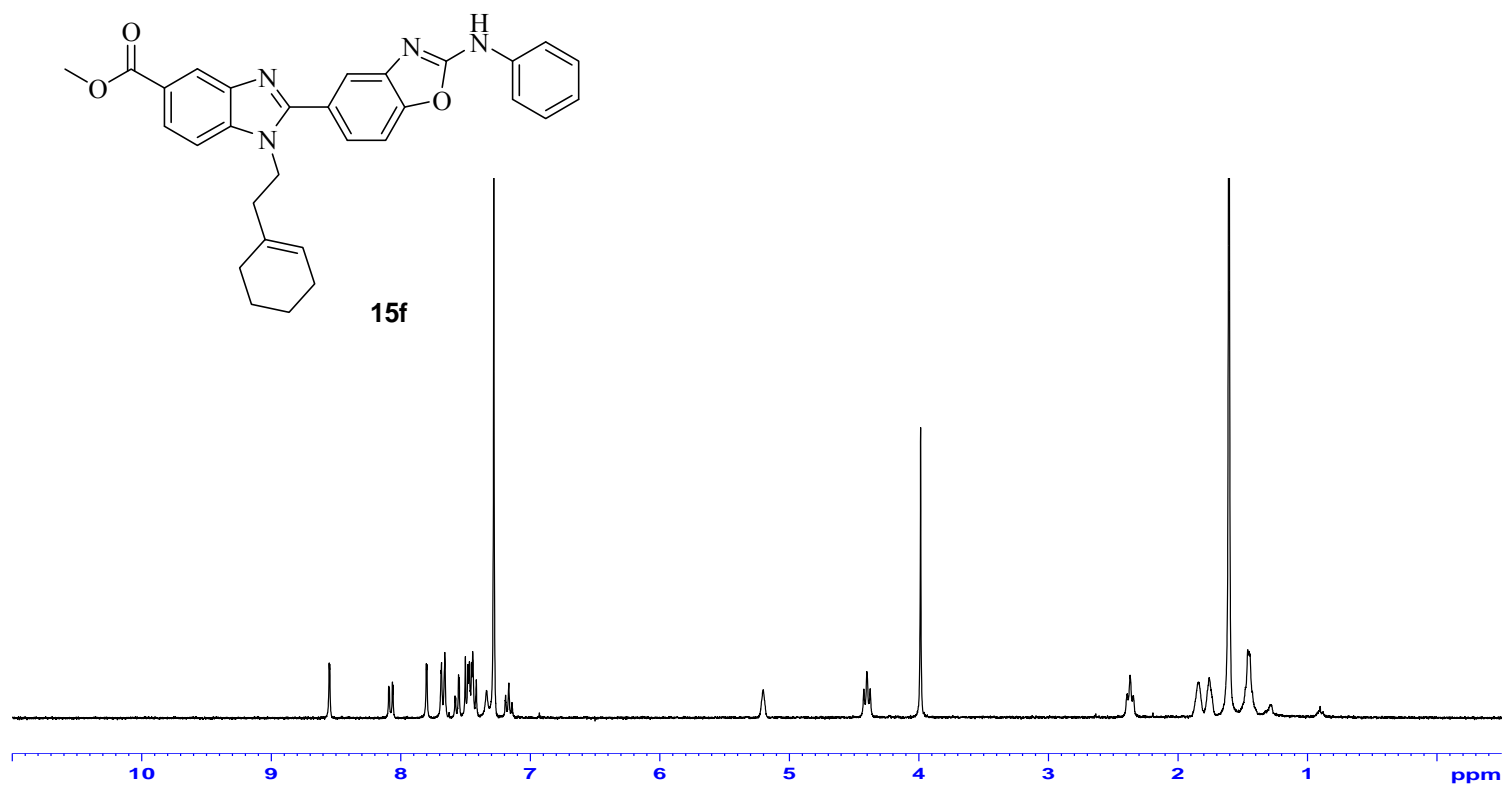

**<sup>1</sup>H NMR spectrum (300 MHz) of compound 15f in CDCl<sub>3</sub>**

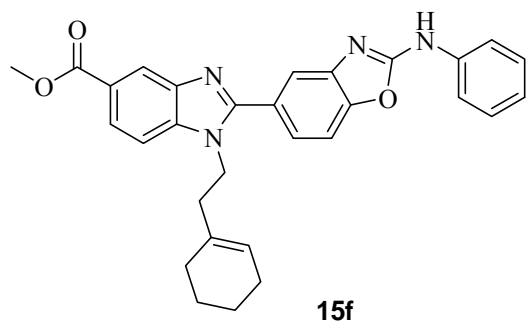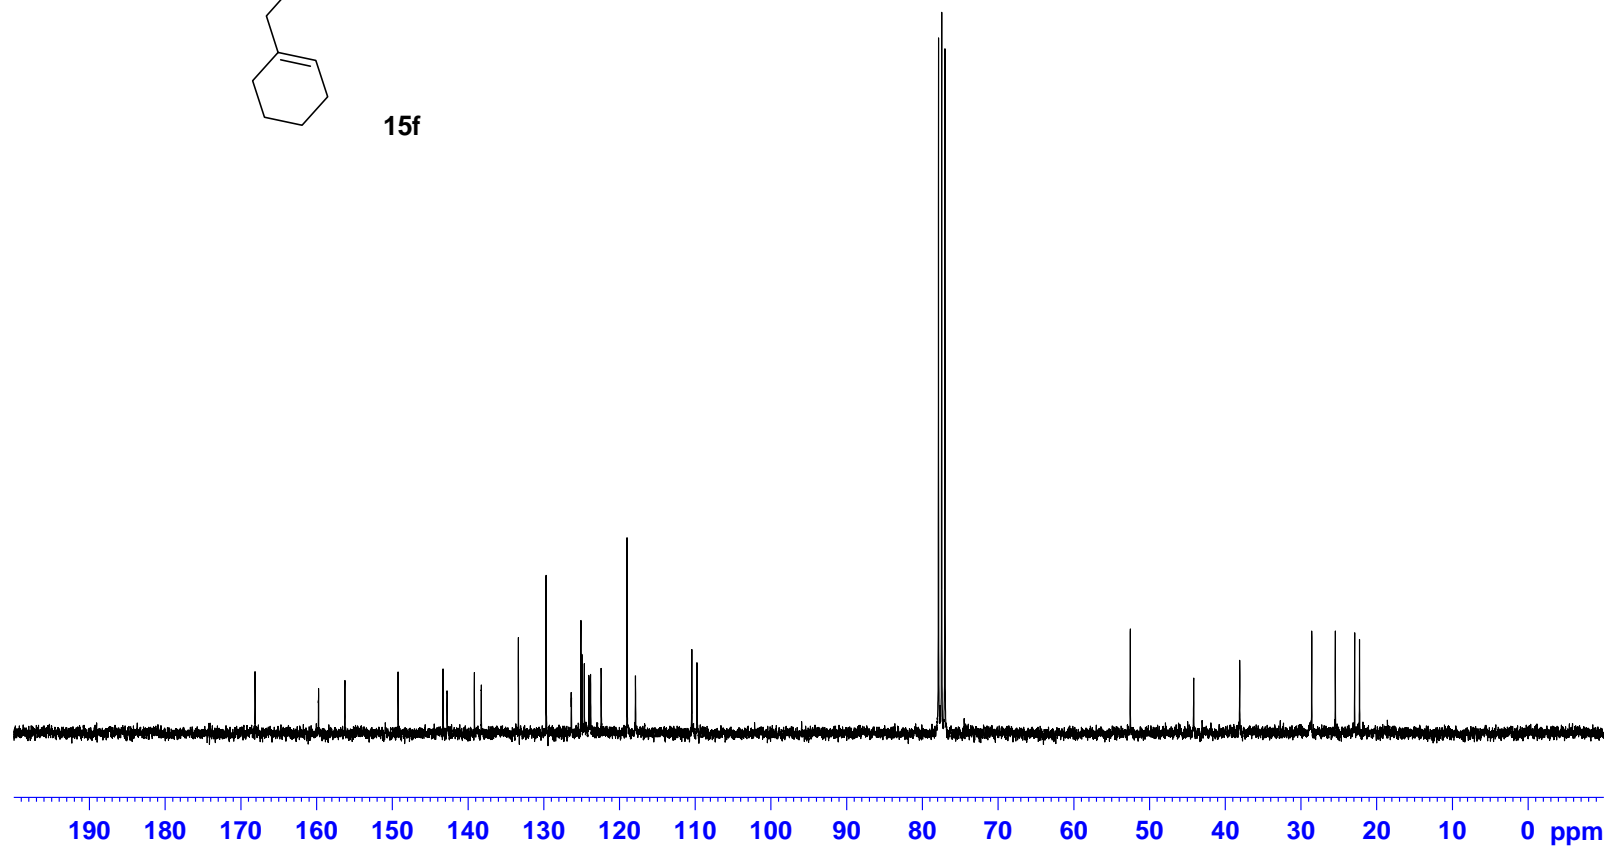

$^{13}\text{C}$  NMR spectrum (75 MHz) of compound 15f in  $\text{CDCl}_3$

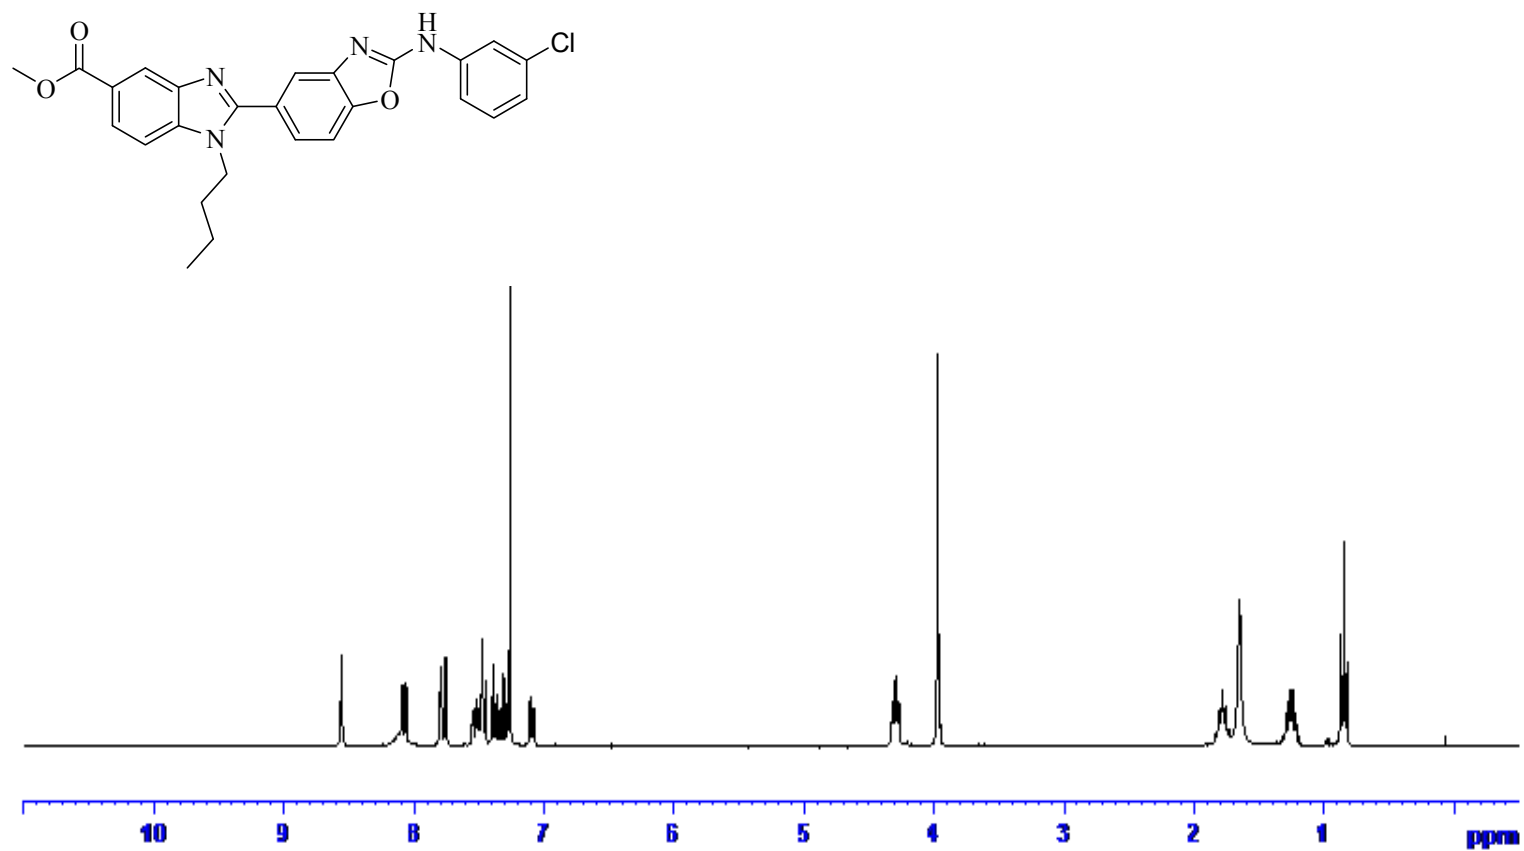

<sup>1</sup>H NMR spectrum (300 MHz) of compound 15g in CDCl<sub>3</sub>

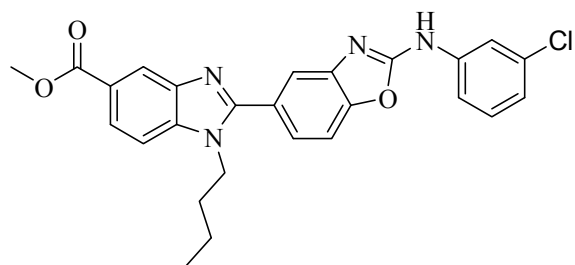

15g

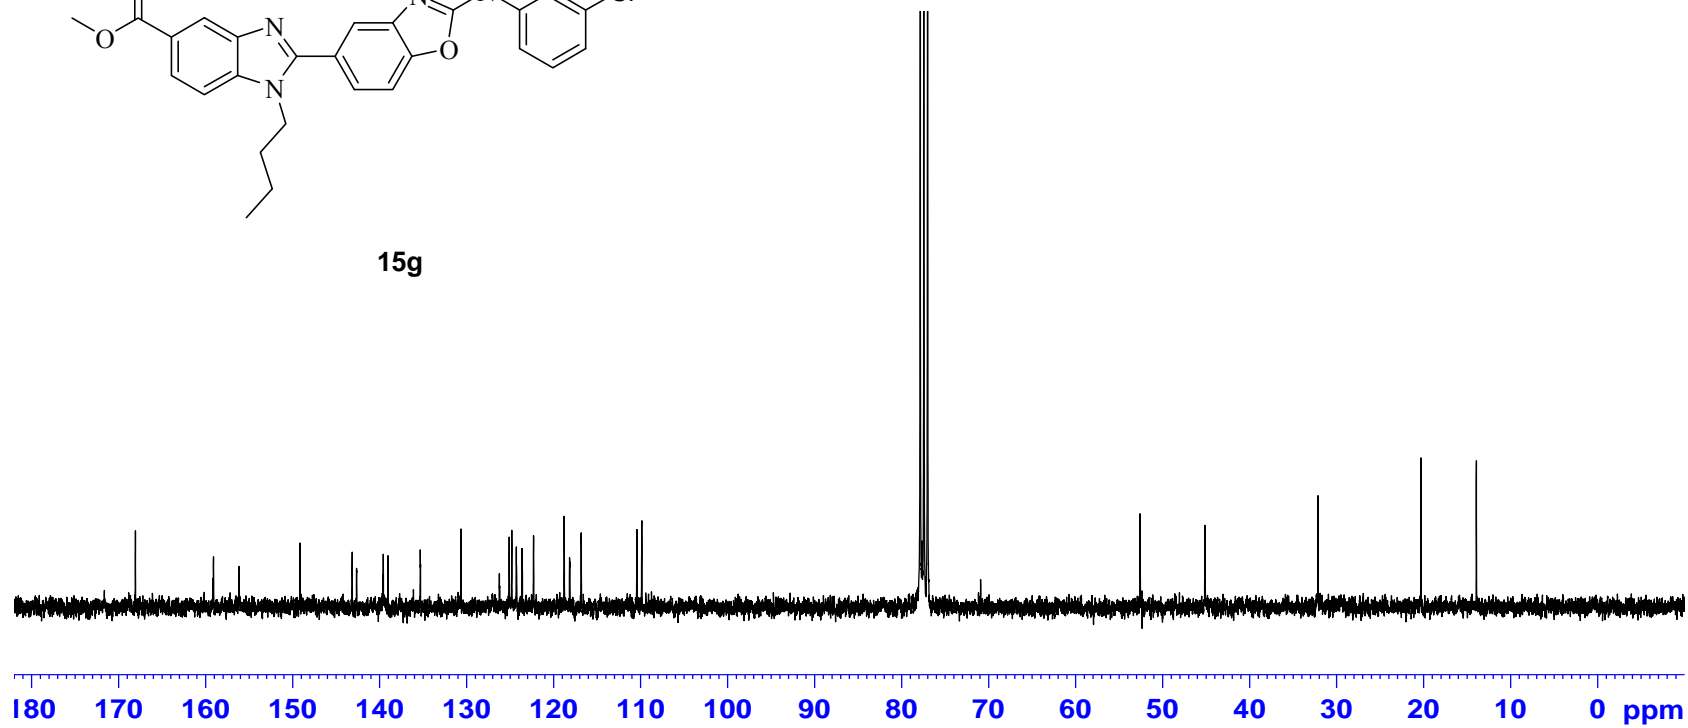

<sup>13</sup>C NMR spectrum (75 MHz) of compound 15g in CDCl<sub>3</sub>

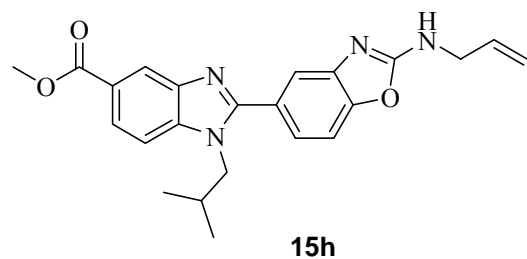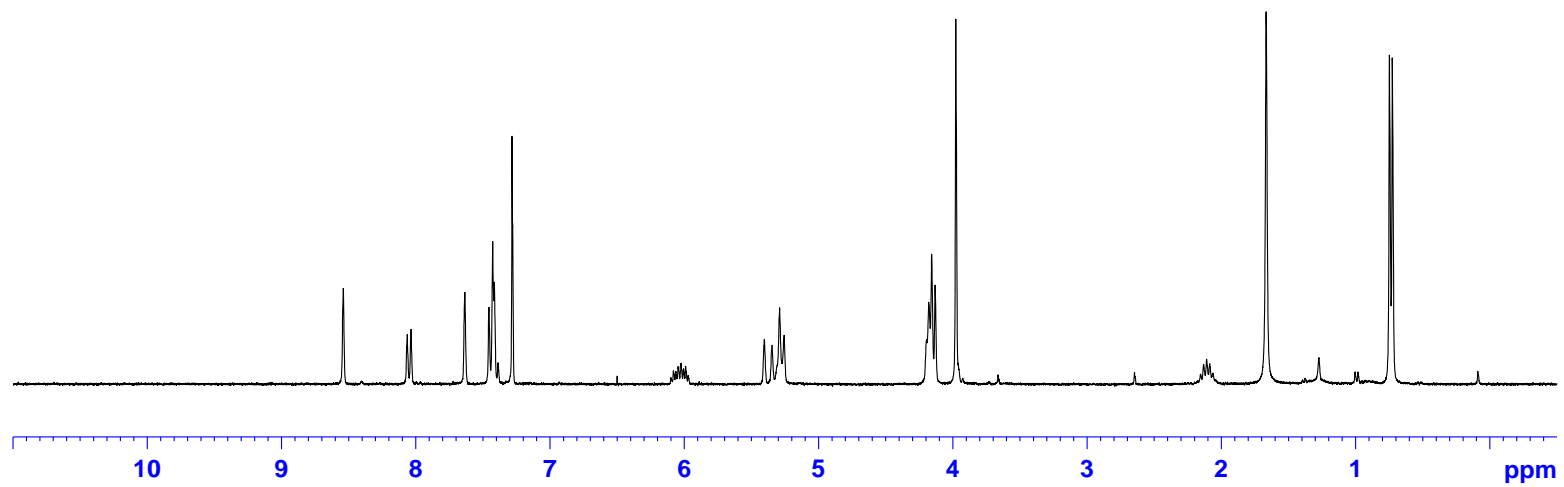

**<sup>1</sup>H NMR spectrum (300 MHz) of compound 15h in CDCl<sub>3</sub>**

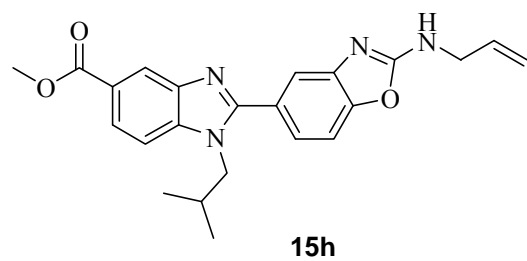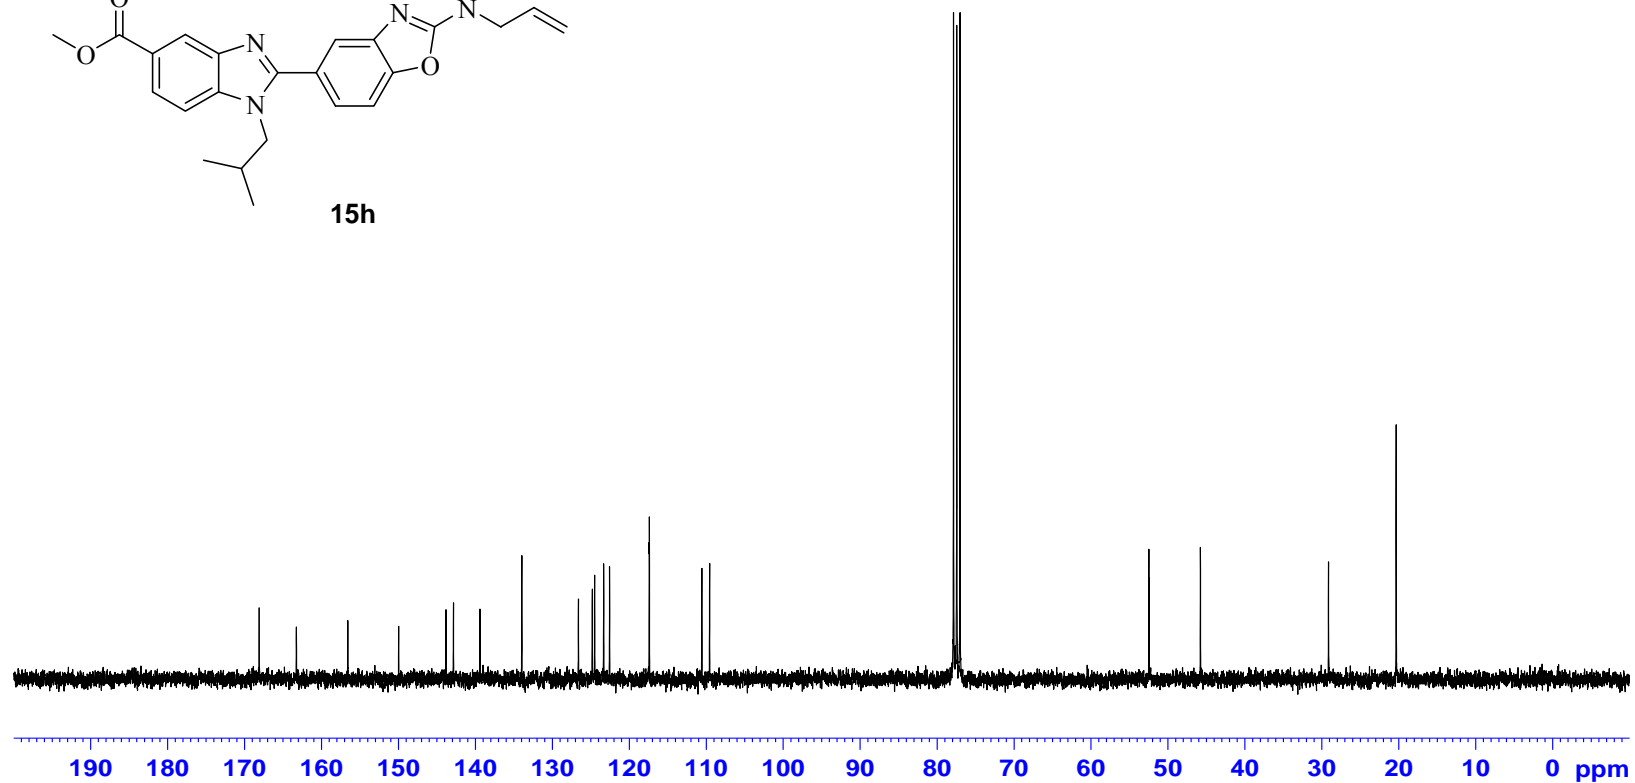

<sup>13</sup>C NMR spectrum (75 MHz) of compound 15h in CDCl<sub>3</sub>

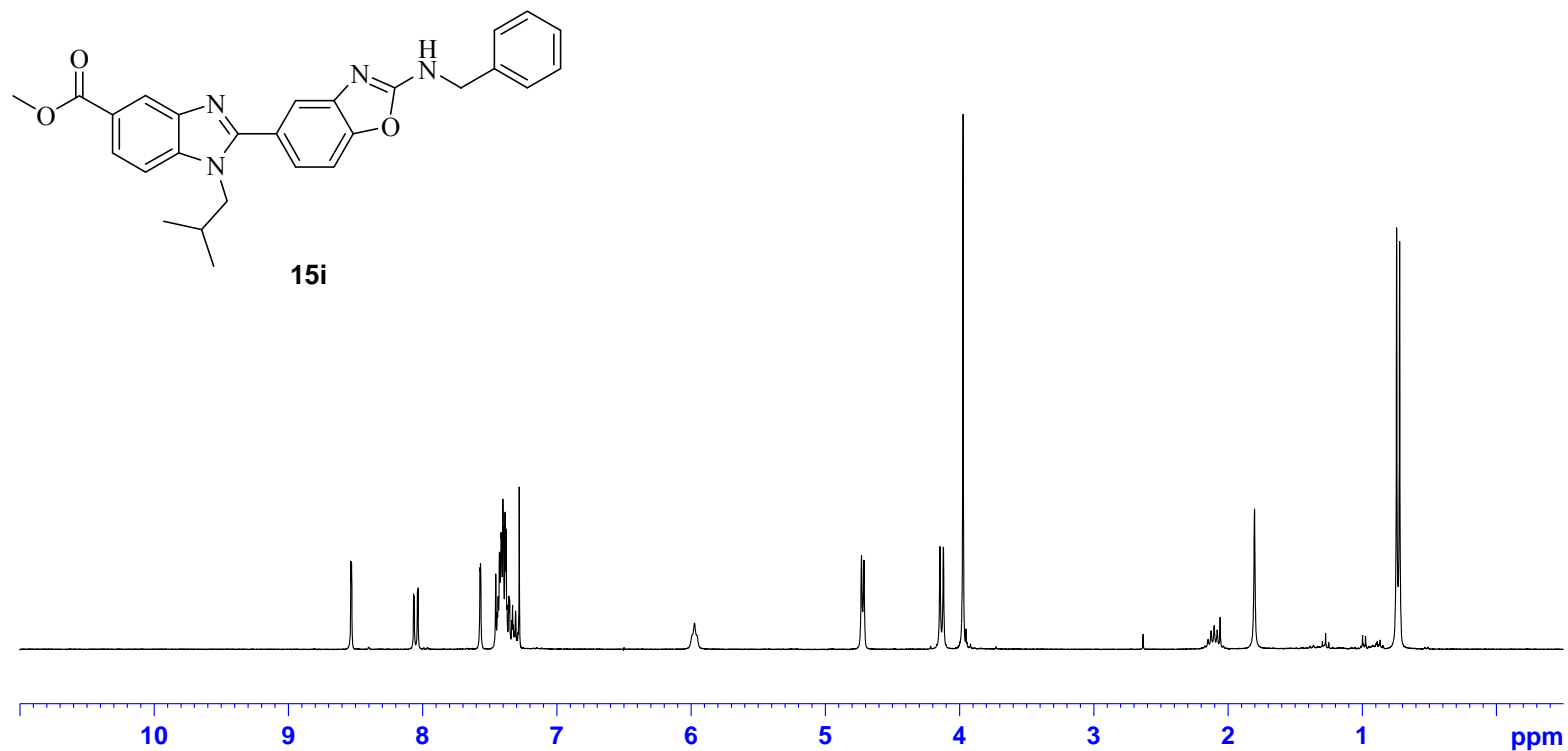

**<sup>1</sup>H NMR spectrum (300 MHz) of compound 15i in CDCl<sub>3</sub>**

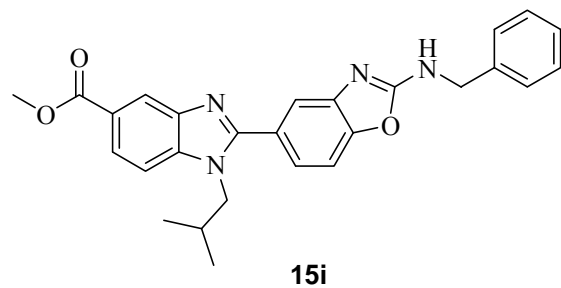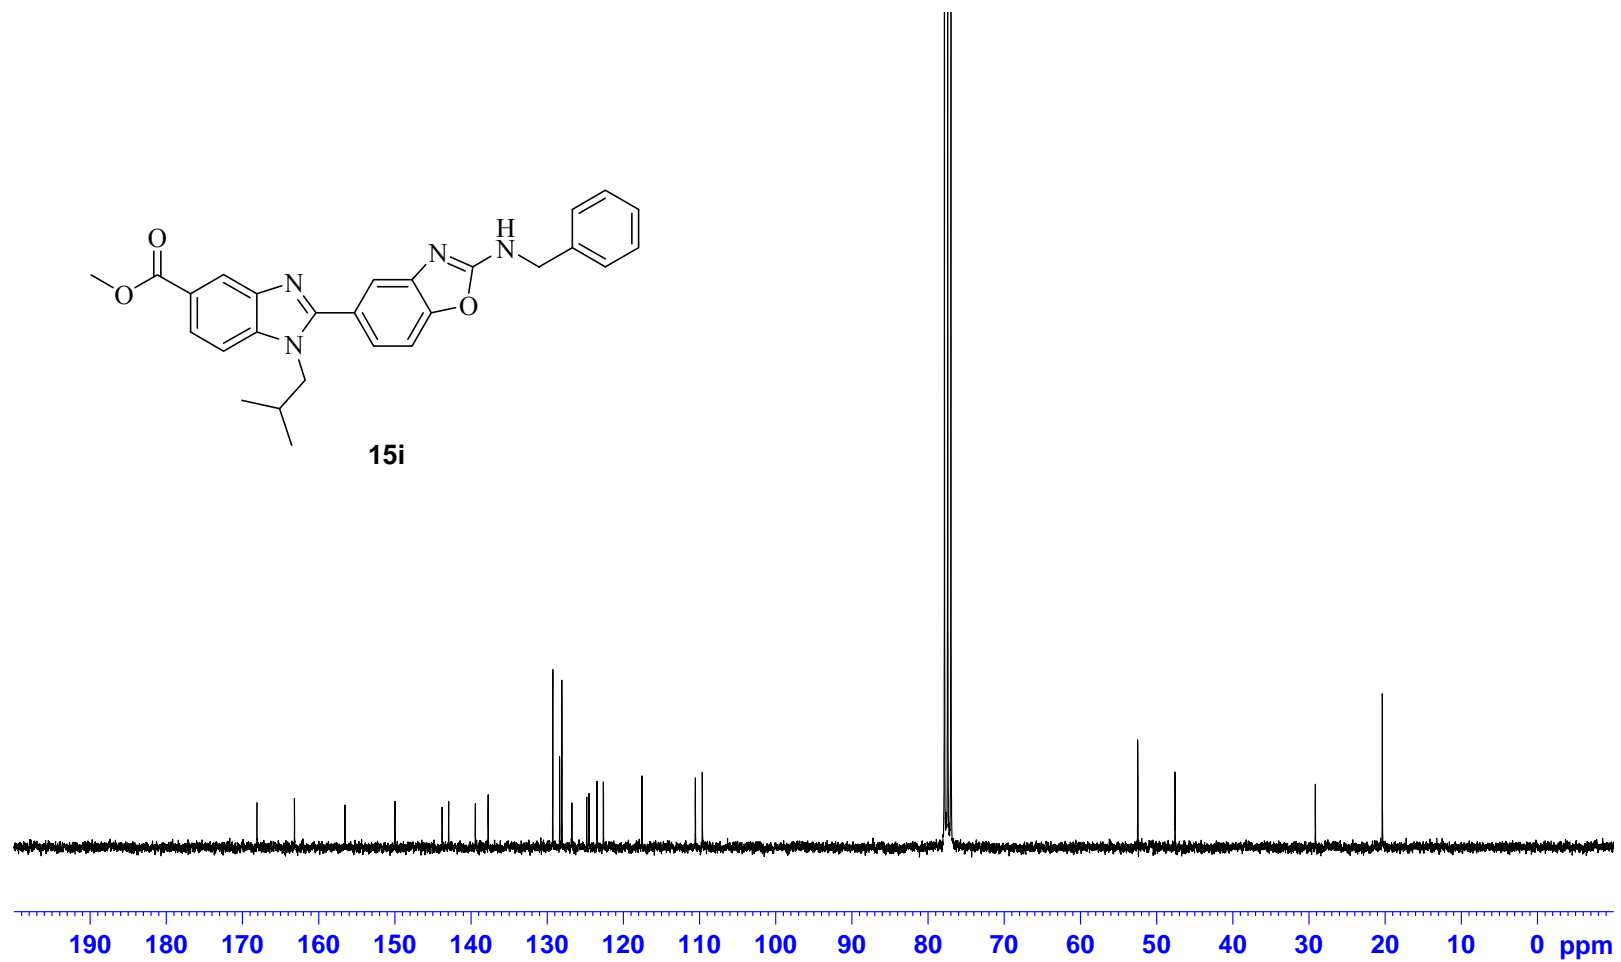

$^{13}\text{C}$  NMR spectrum (75 MHz) of compound 15i in  $\text{CDCl}_3$



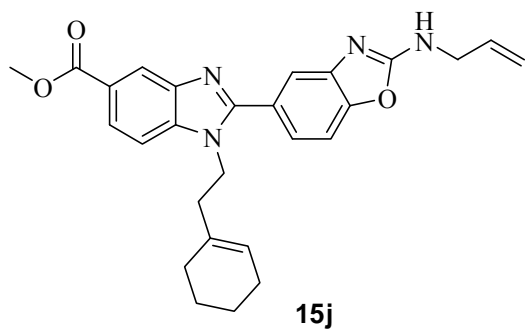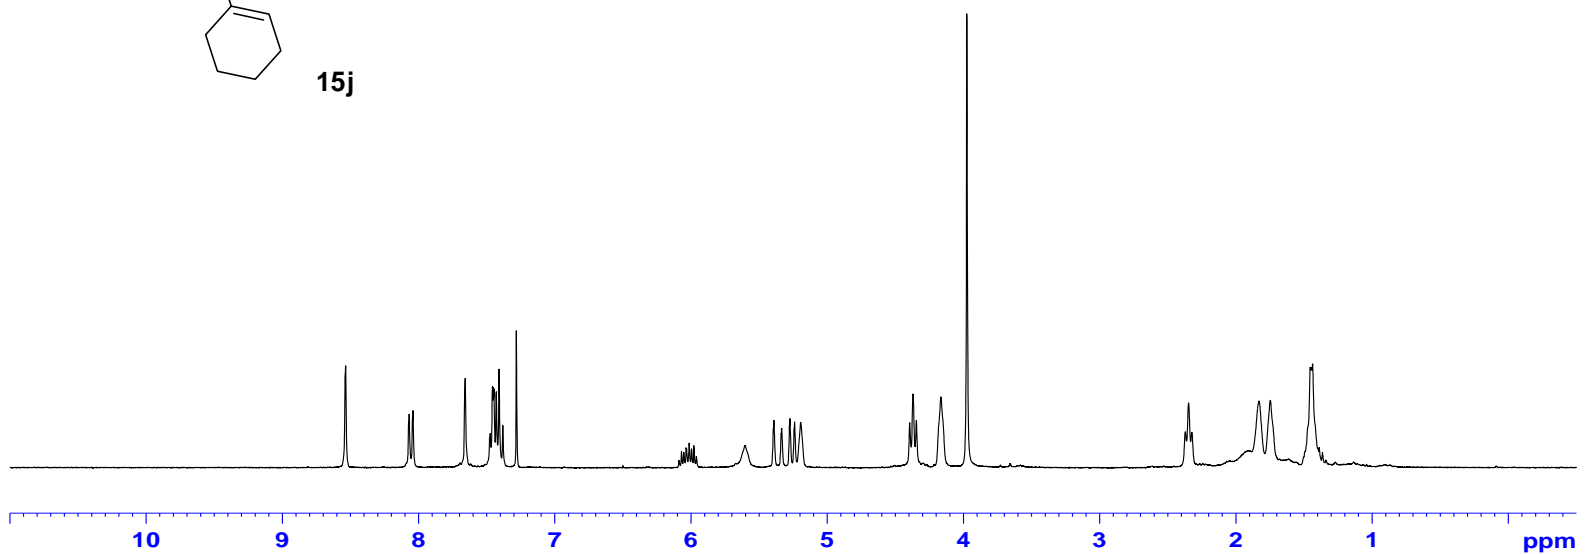

<sup>1</sup>H NMR spectrum (300 MHz) of compound 15j in CDCl<sub>3</sub>

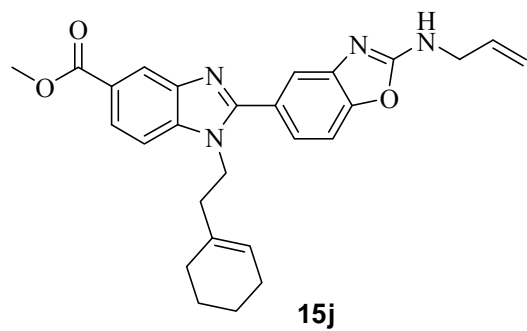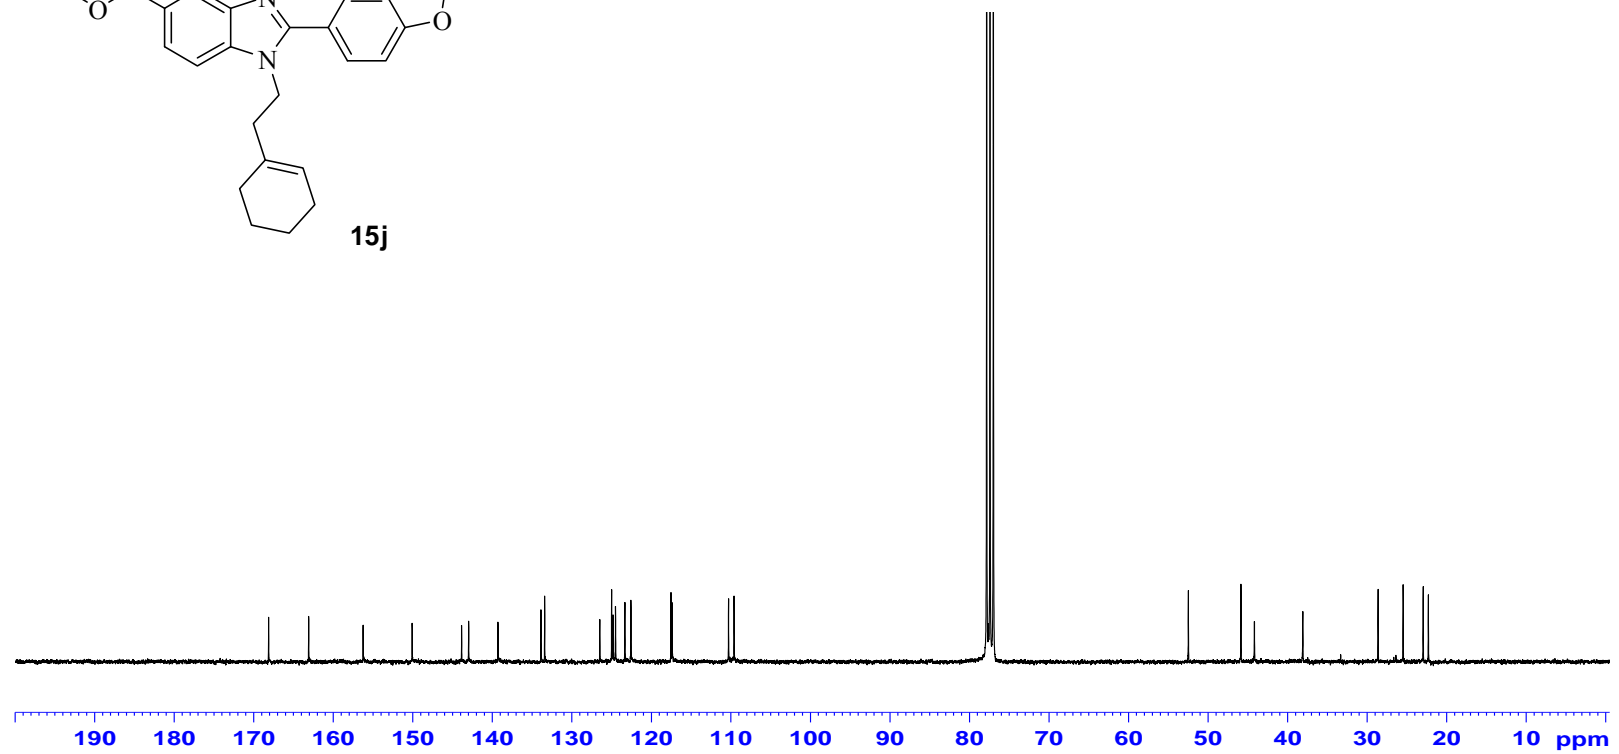

<sup>13</sup>C NMR spectrum (75 MHz) of compound 15j in CDCl<sub>3</sub>

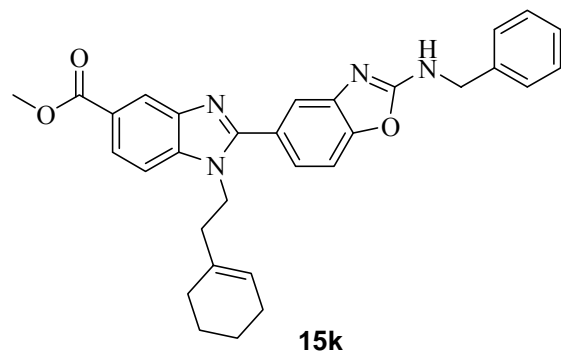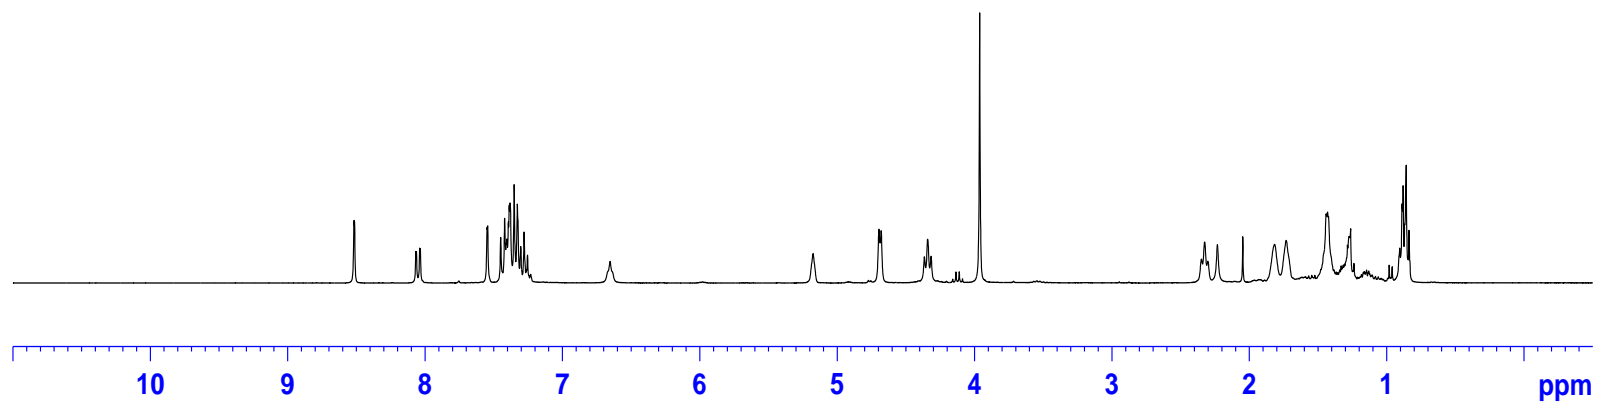

$^1\text{H}$ NMR spectrum (300 MHz) of compound 15k in  $\text{CDCl}_3$

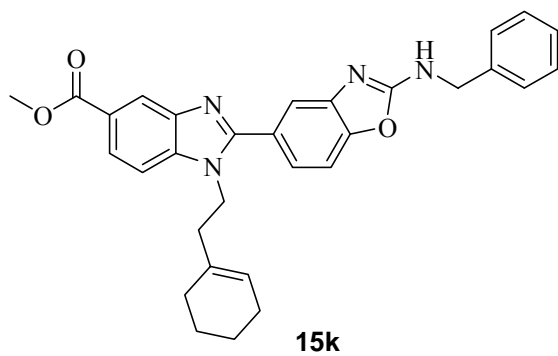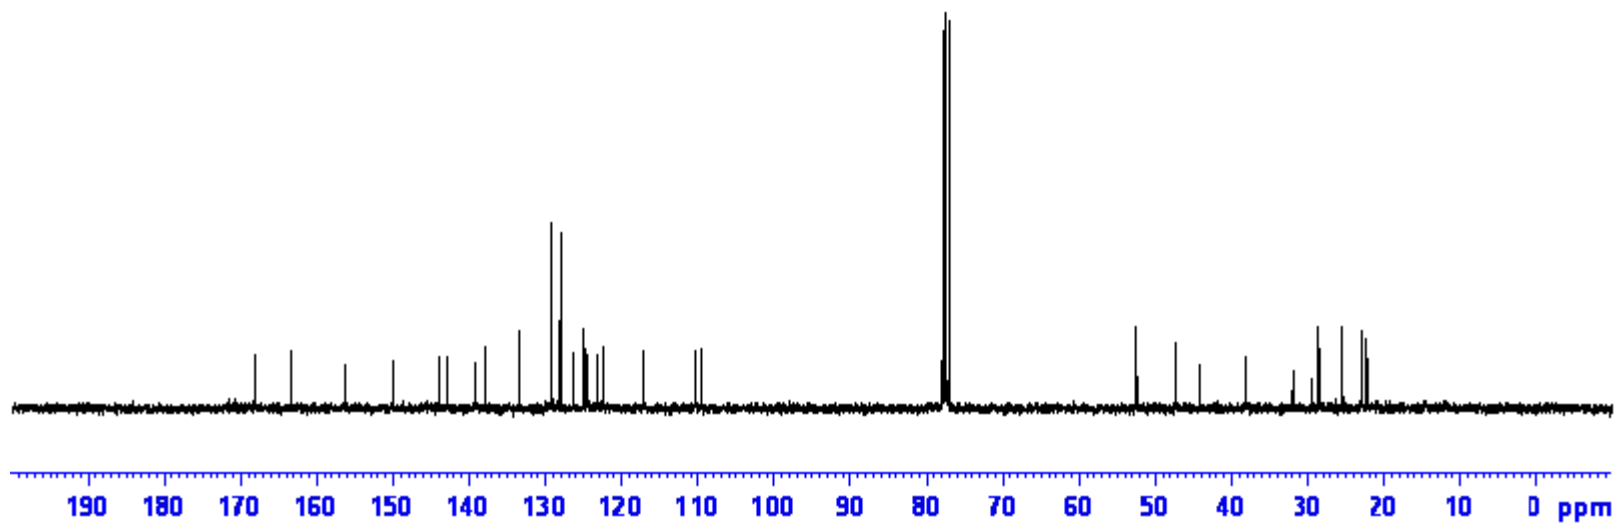

$^{13}\text{C}$  NMR spectrum (75 MHz) of compound 15k in  $\text{CDCl}_3$

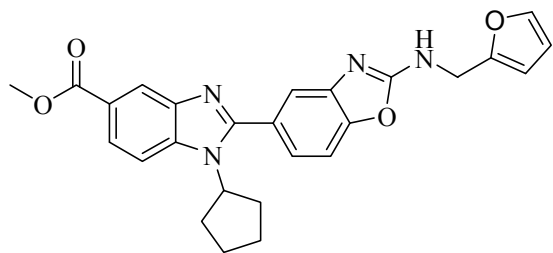

**15l**

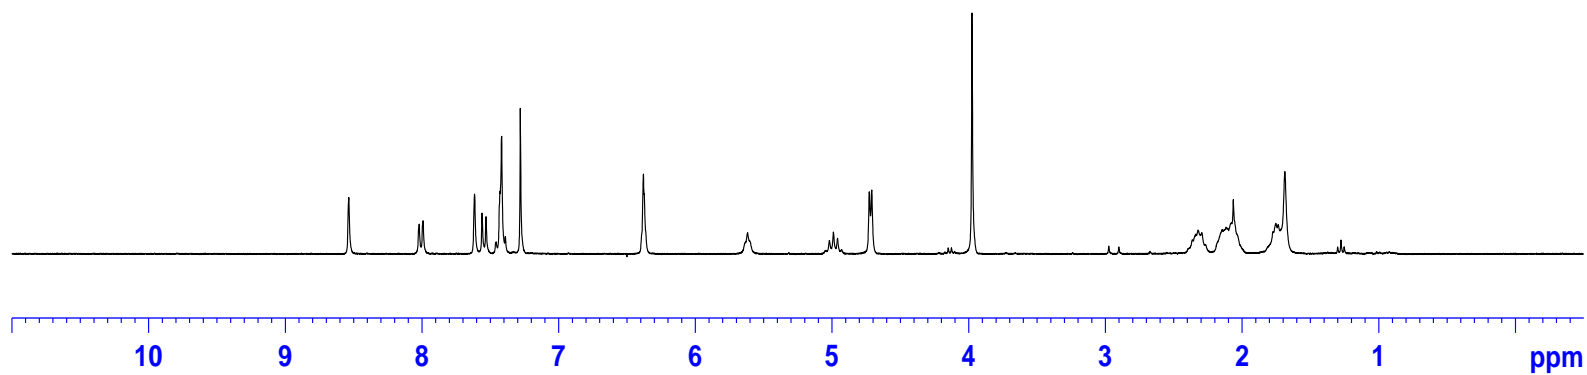

**<sup>1</sup>H NMR spectrum (300 MHz) of compound 15l in CDCl<sub>3</sub>**

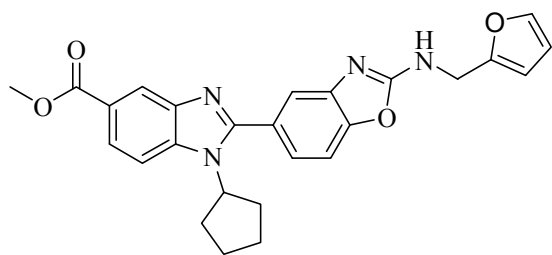

**15l**

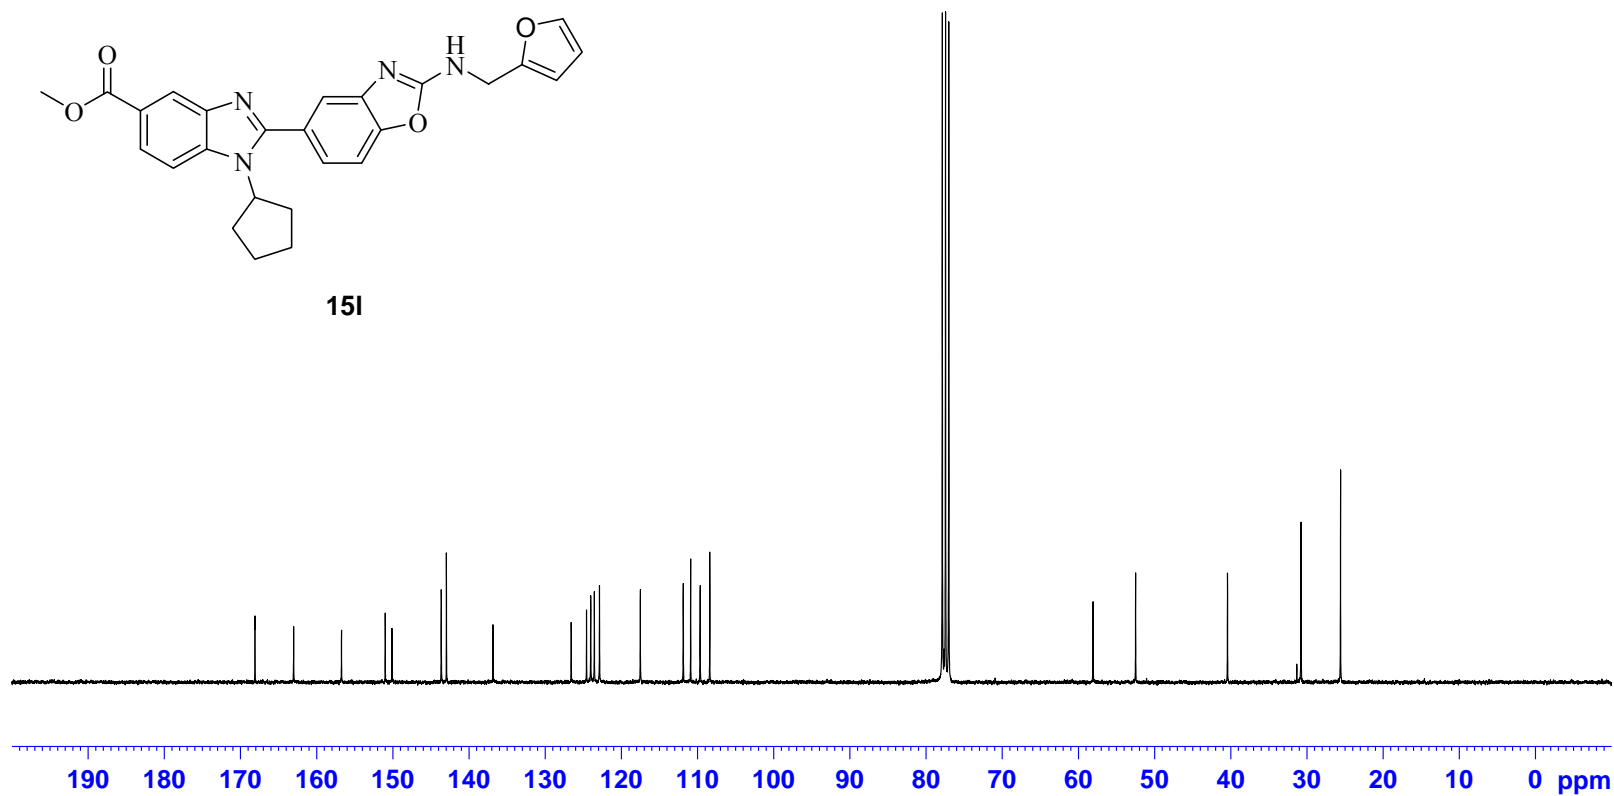

$^{13}\text{C}$  NMR spectrum (75 MHz) of compound 15l in  $\text{CDCl}_3$

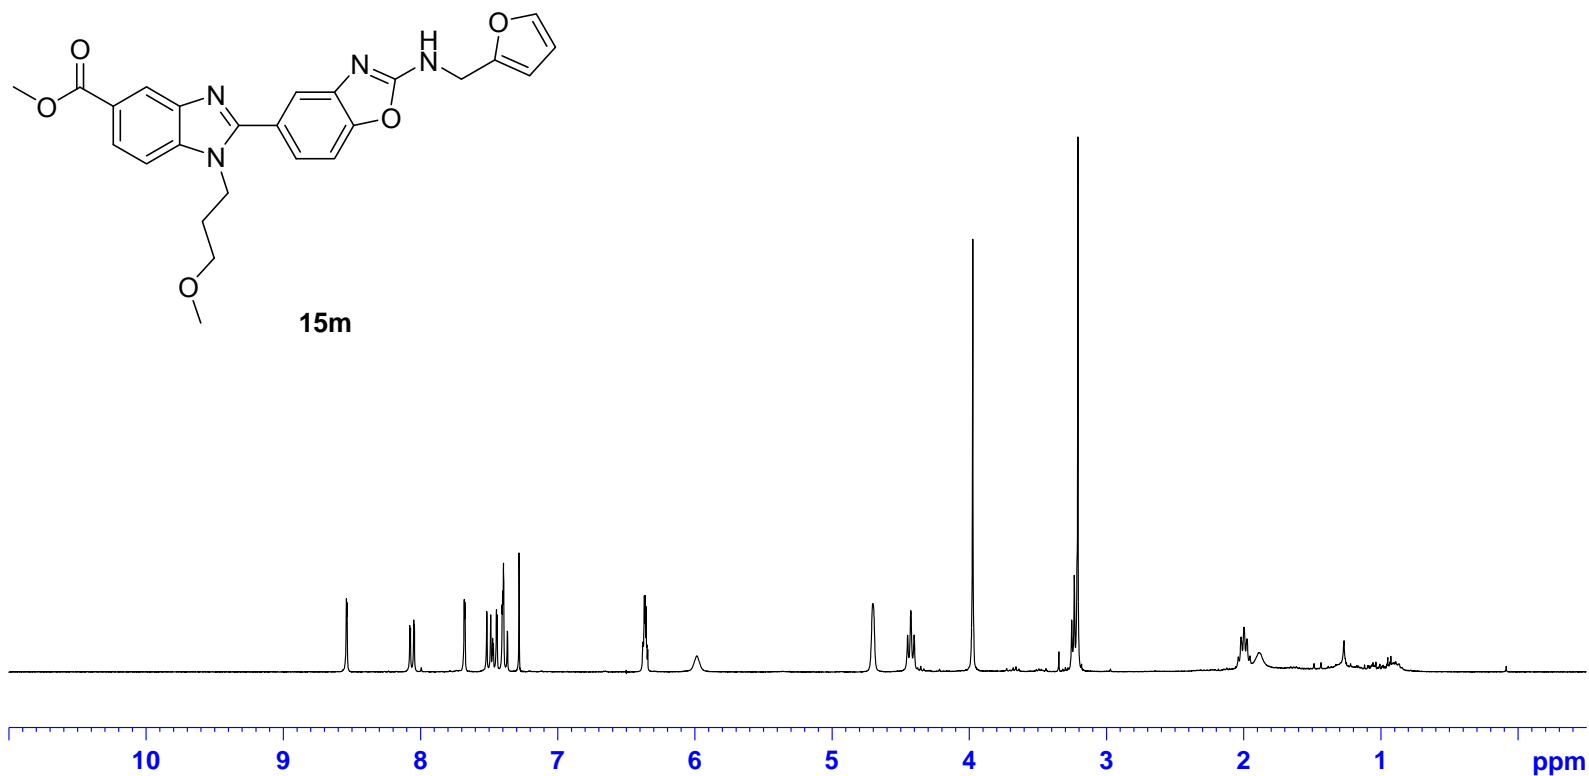

15m

<sup>1</sup>H NMR spectrum (300 MHz) of compound 15m in CDCl<sub>3</sub>

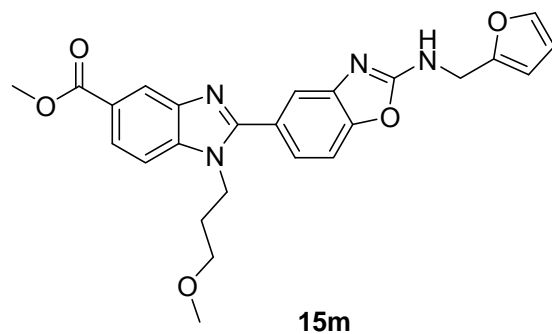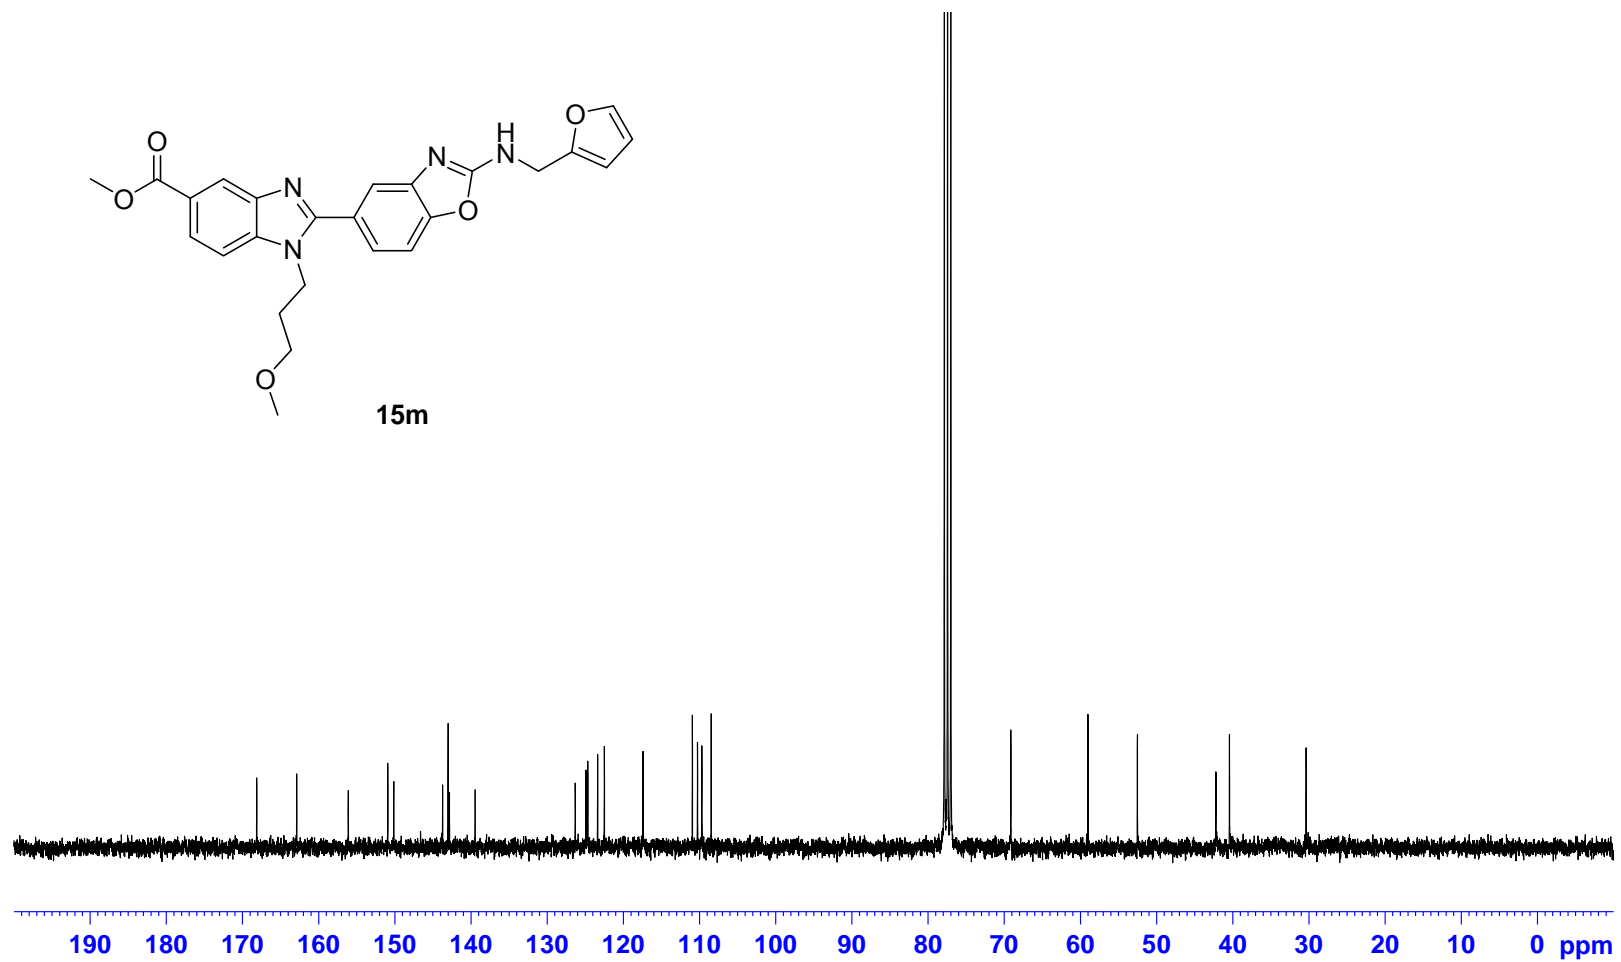

$^{13}\text{C}$  NMR spectrum (75 MHz) of compound 15m in  $\text{CDCl}_3$



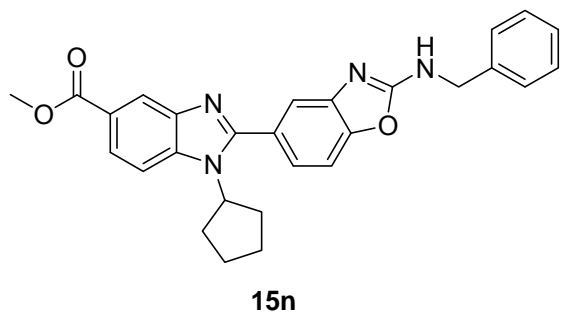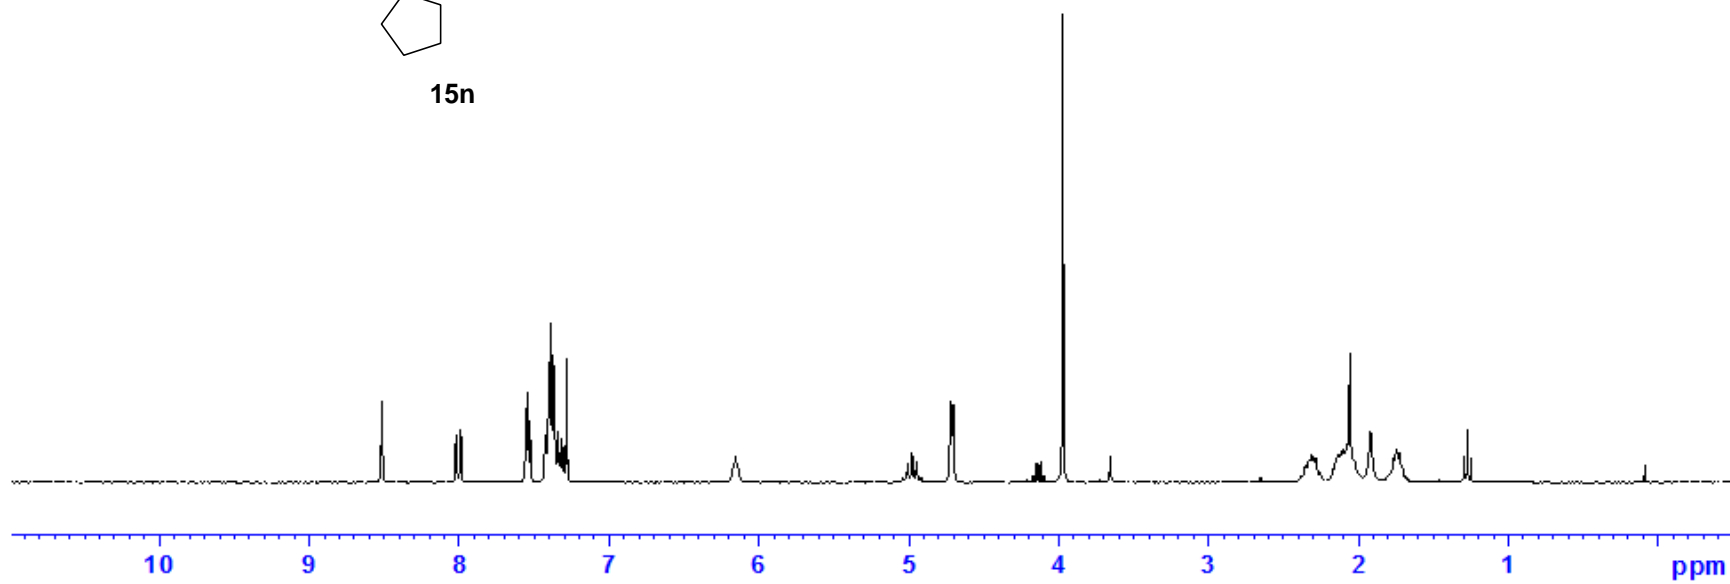

**<sup>1</sup>H NMR spectrum (300 MHz) of compound 15n in CDCl<sub>3</sub>**

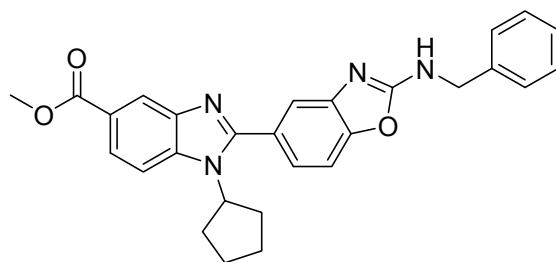

**15n**

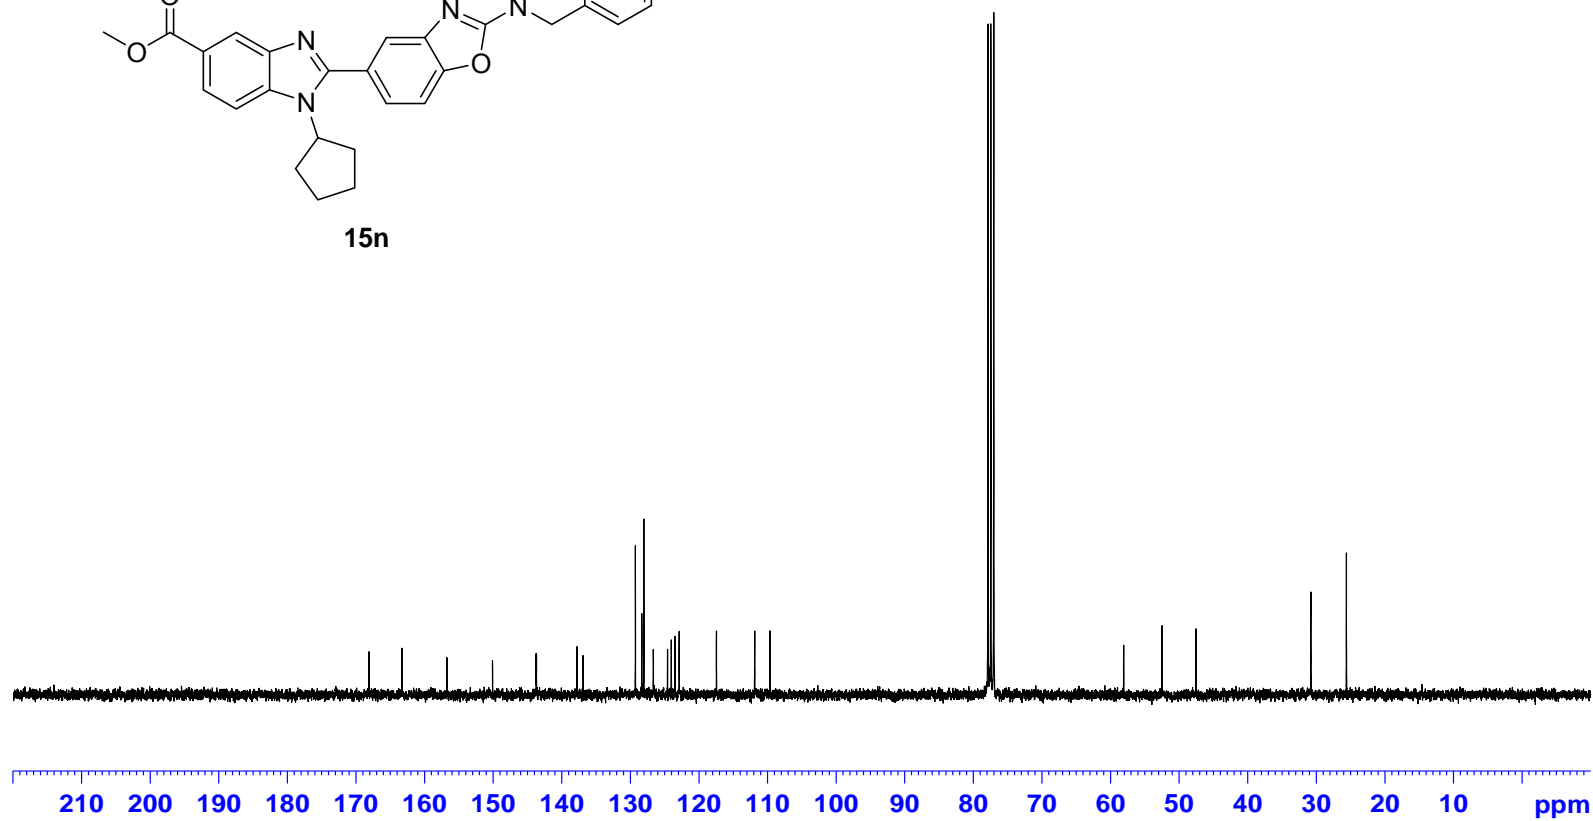

**<sup>13</sup>C NMR spectrum (75 MHz) of compound 15n in CDCl<sub>3</sub>**

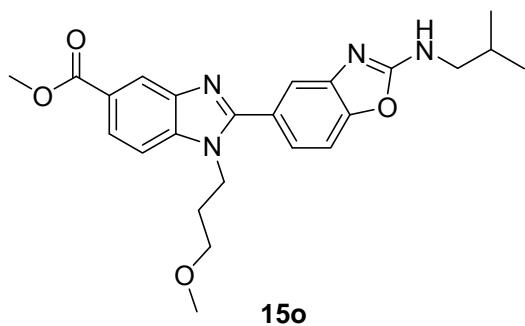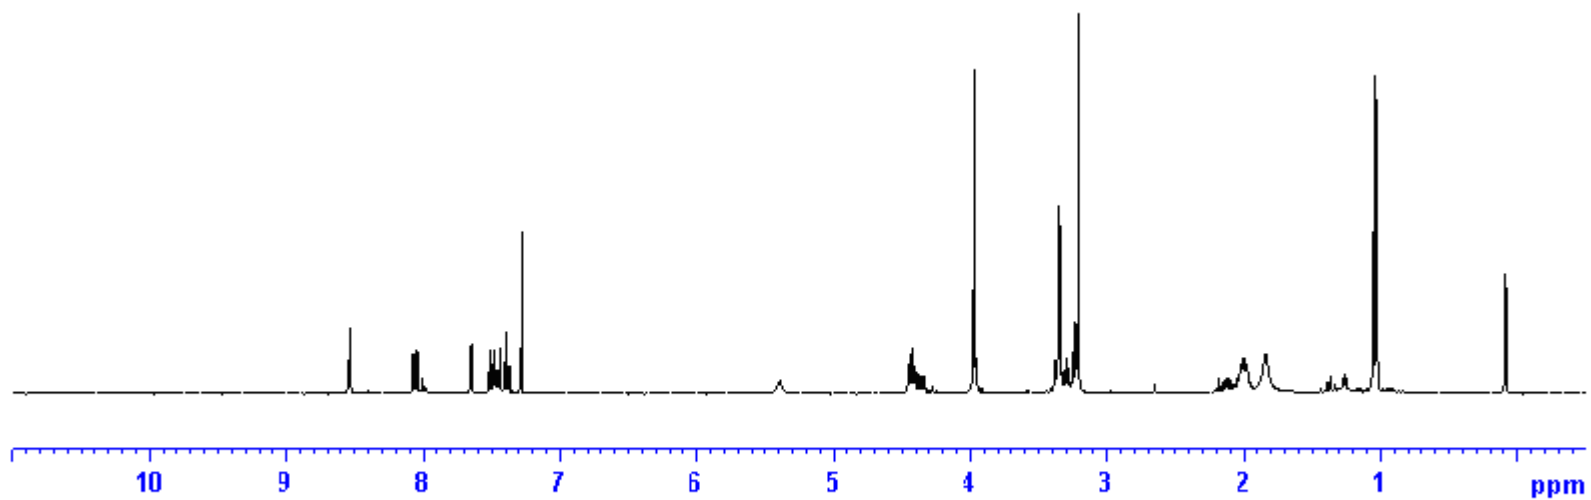

**<sup>1</sup>H NMR spectrum (300 MHz) of compound 15o in CDCl<sub>3</sub>**

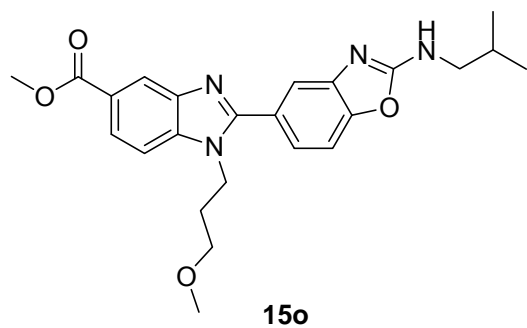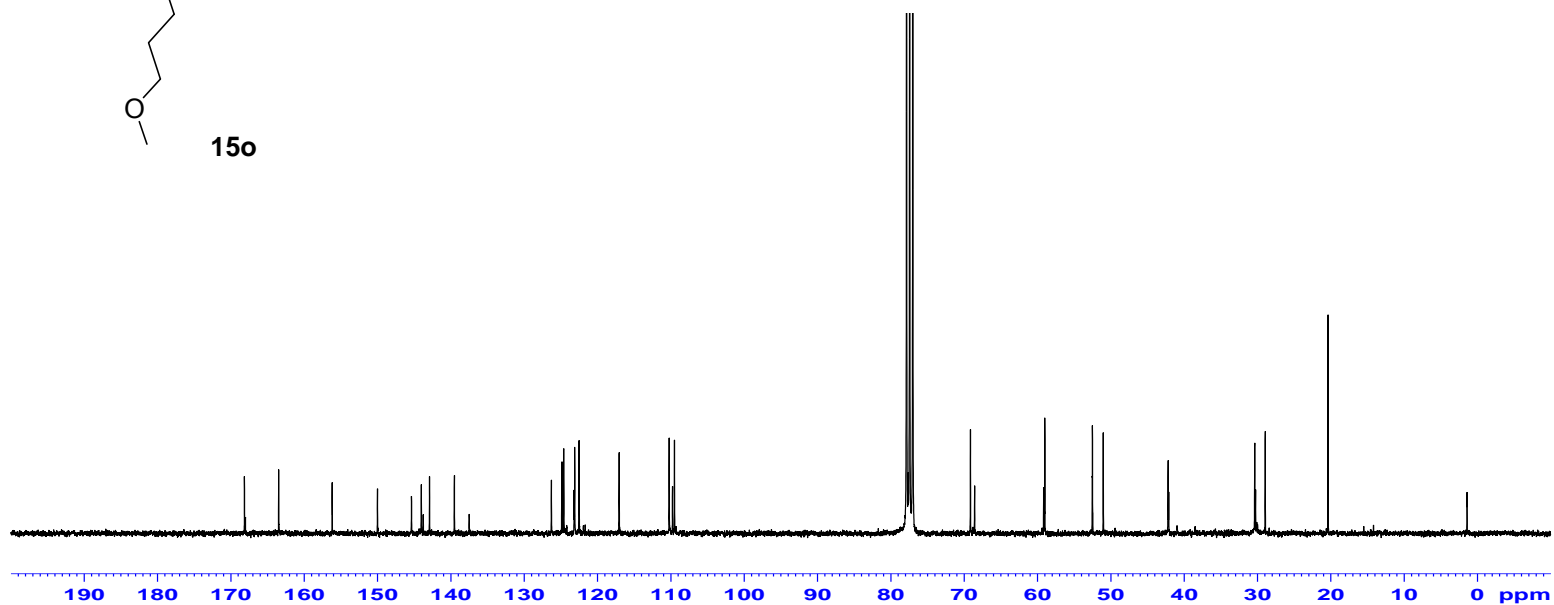

$^{13}\text{C}$  NMR spectrum (75 MHz) of compound 15o in  $\text{CDCl}_3$

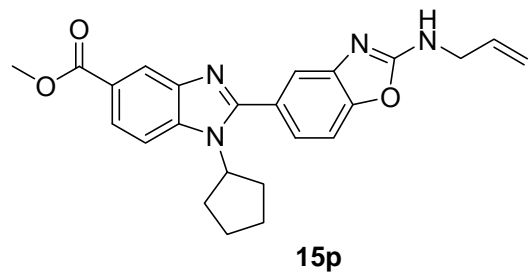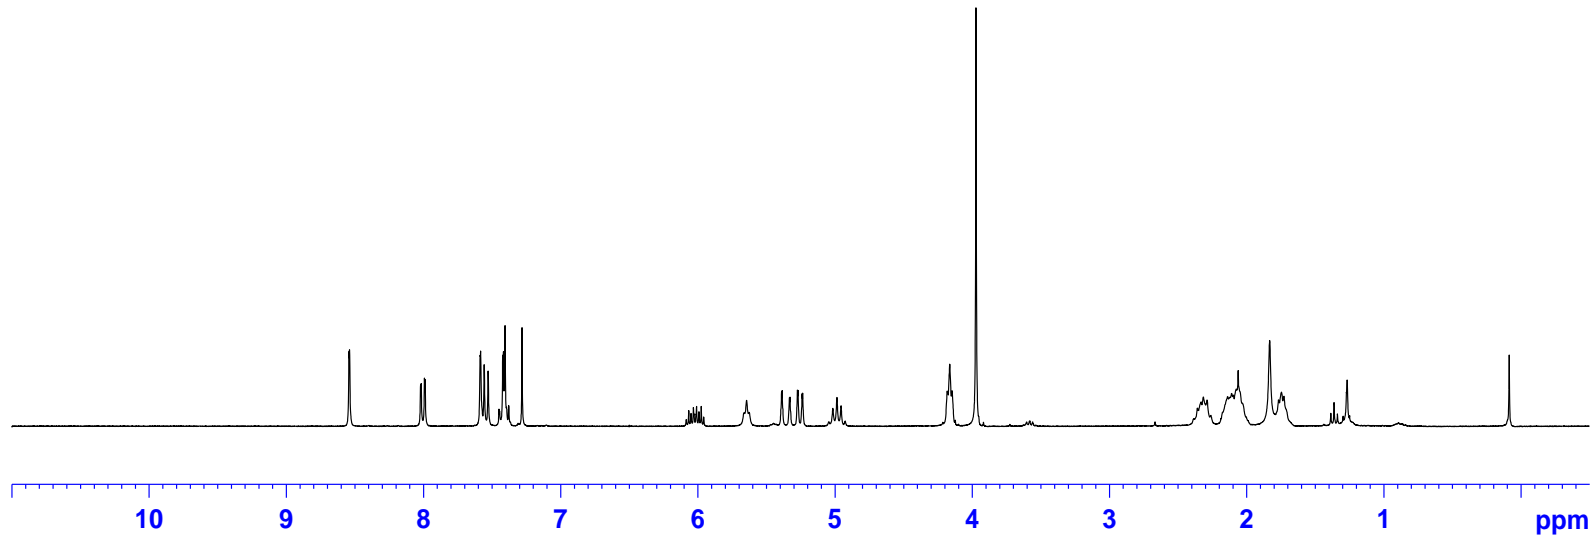

**<sup>1</sup>H NMR spectrum (300 MHz) of compound 15p in CDCl<sub>3</sub>**

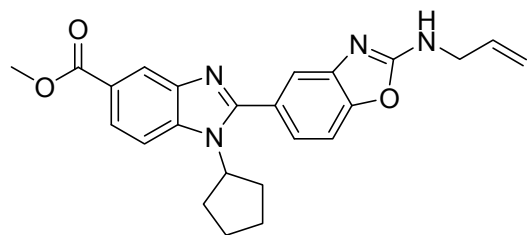

15p

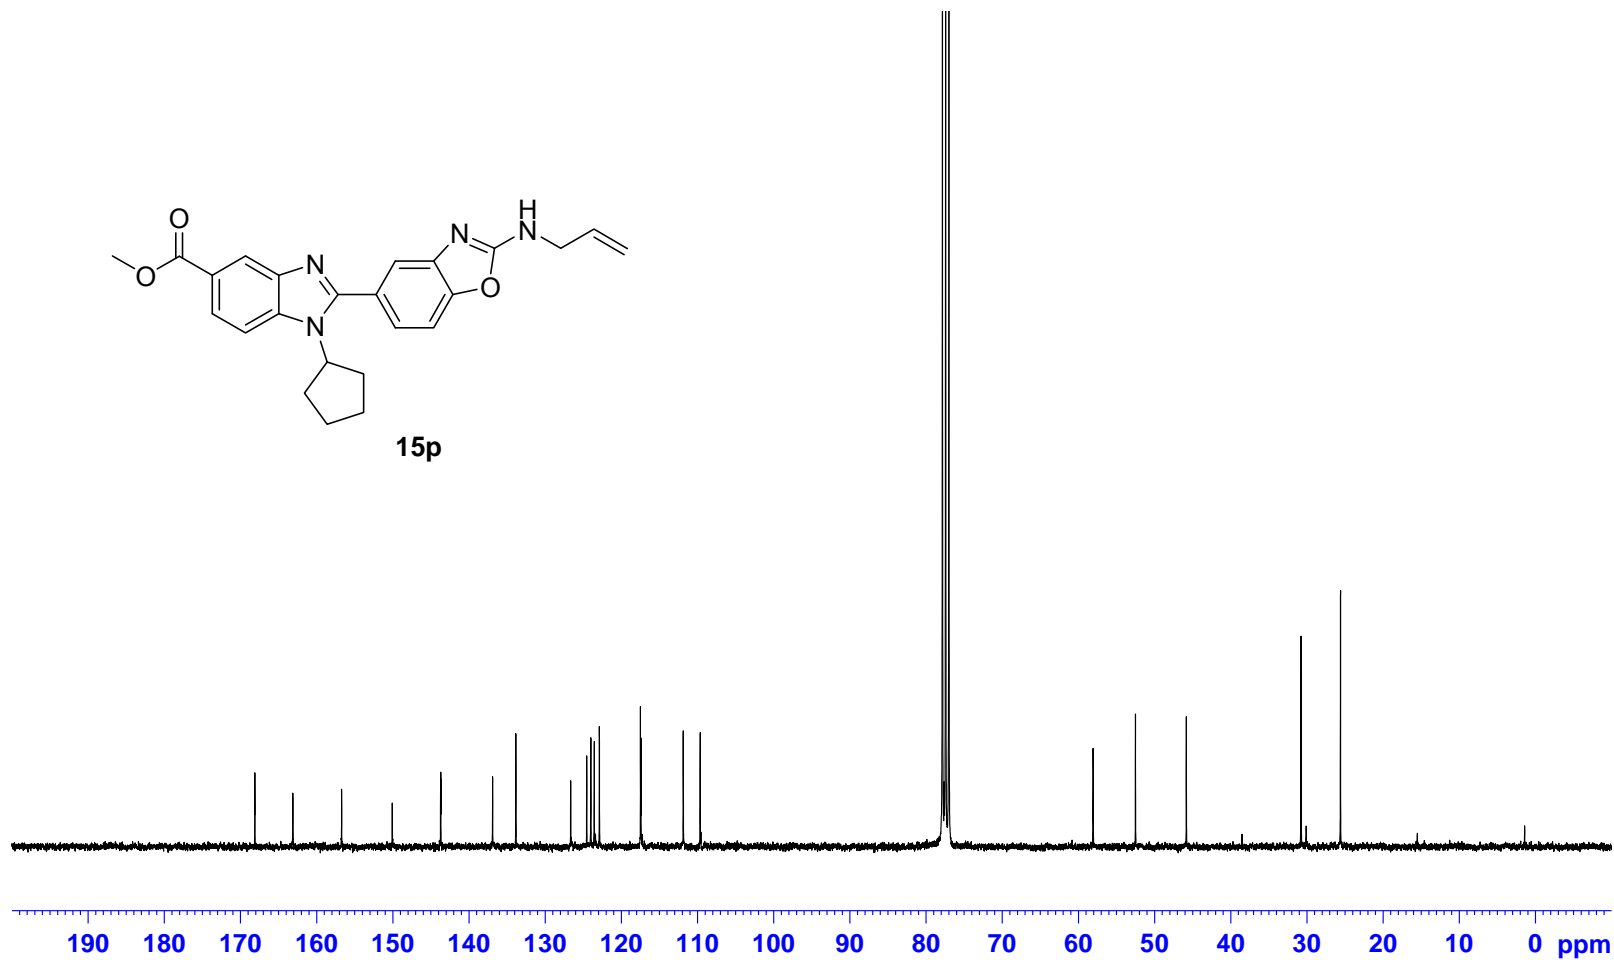

<sup>13</sup>C NMR spectrum (75 MHz) of compound 15p in CDCl<sub>3</sub>

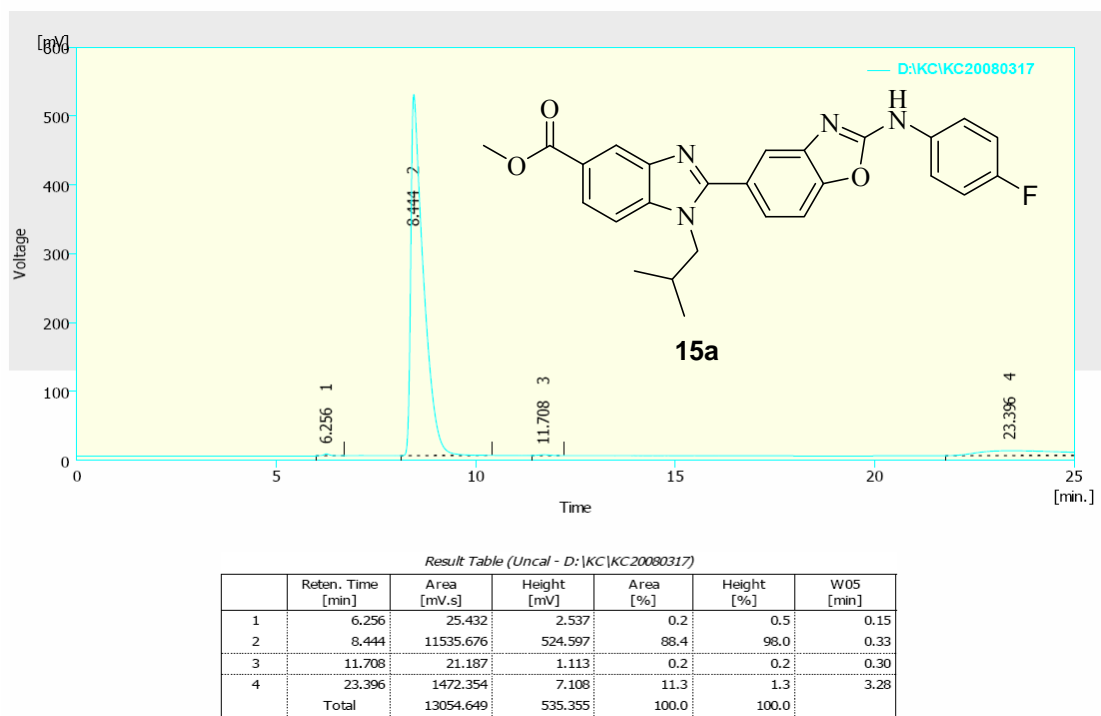

### Crude HPLC Spectra of Compound 15a

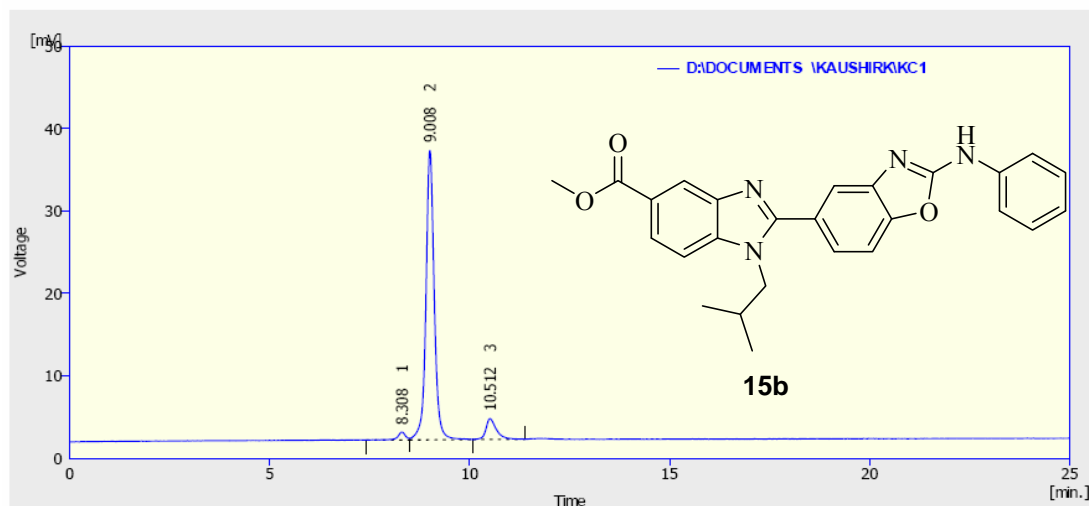

Result Table (Uncal - D:\DOCUMENTS \KAUSHIRK\KC1)

|   | Reten. Time [min] | Area [mV.s] | Height [mV] | Area [%] | Height [%] | W05 [min] |
|---|-------------------|-------------|-------------|----------|------------|-----------|
| 1 | 8.308             | 13.685      | 0.945       | 2.4      | 2.4        | 0.19      |
| 2 | 9.008             | 506.734     | 35.125      | 89.4     | 91.0       | 0.21      |
| 3 | 10.512            | 46.271      | 2.515       | 8.2      | 6.5        | 0.26      |
|   | Total             | 566.690     | 38.585      | 100.0    | 100.0      |           |

### Crude HPLC Spectra of Compound 15b



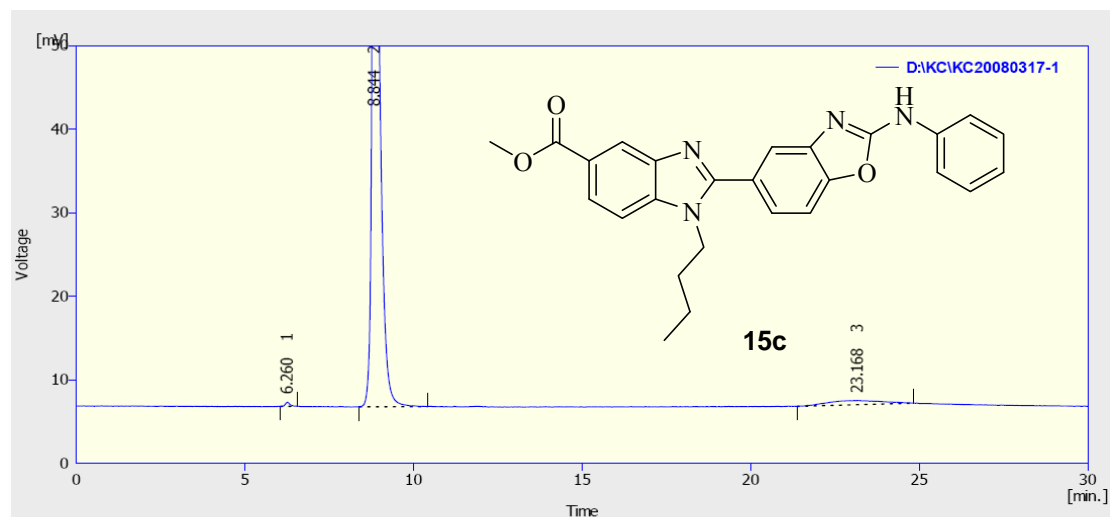

Result Table (Uncal - D:\KC\KC20080317-1)

|   | Reten. Time [min] | Area [mV.s] | Height [mV] | Area [%] | Height [%] | W05 [min] |
|---|-------------------|-------------|-------------|----------|------------|-----------|
| 1 | 6.260             | 4.605       | 0.488       | 0.3      | 0.6        | 0.14      |
| 2 | 8.844             | 1355.025    | 87.533      | 95.5     | 98.9       | 0.22      |
| 3 | 23.168            | 58.555      | 0.519       | 4.1      | 0.6        | 2.12      |
|   | Total             | 1418.185    | 88.539      | 100.0    | 100.0      |           |

### Crude HPLC Spectra of Compound 15c

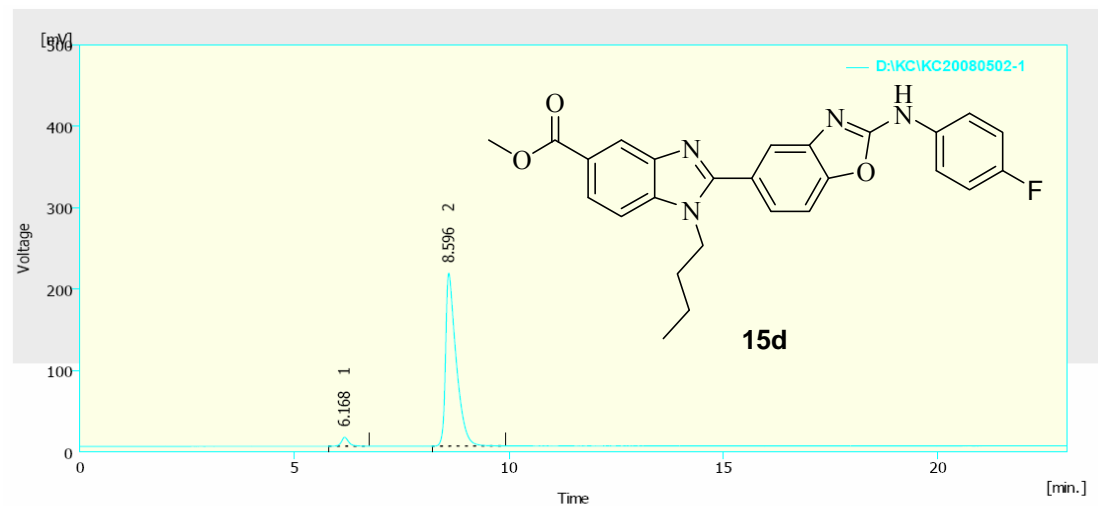

Result Table (Uncal - D:\KC\KC20080502-1)

|   | Reten. Time [min] | Area [mV.s] | Height [mV] | Area [%] | Height [%] | W05 [min] |
|---|-------------------|-------------|-------------|----------|------------|-----------|
| 1 | 6.168             | 130.059     | 10.941      | 3.4      | 4.9        | 0.18      |
| 2 | 8.596             | 3660.406    | 212.303     | 96.6     | 95.1       | 0.26      |
|   | Total             | 3790.465    | 223.244     | 100.0    | 100.0      |           |

### Crude HPLC Spectra of Compound 15d

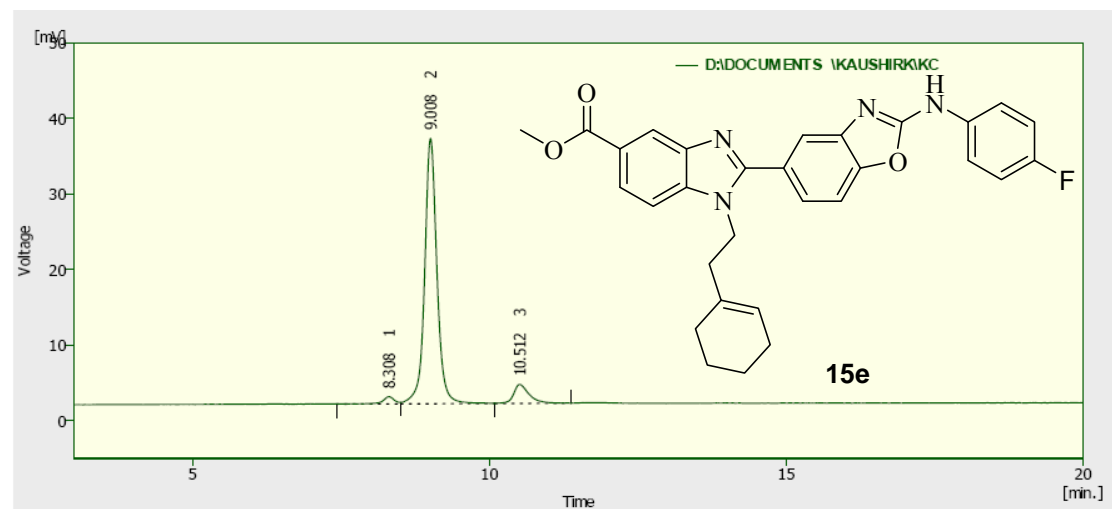

Result Table (Uncal - D:\DOCUMENTS [KAUSHIRK]KC)

|       | Reten. Time [min] | Area [mV.s] | Height [mV] | Area [%] | Height [%] | W05 [min] |
|-------|-------------------|-------------|-------------|----------|------------|-----------|
| 1     | 8.308             | 13.685      | 0.945       | 2.4      | 2.4        | 0.19      |
| 2     | 9.008             | 506.734     | 35.125      | 89.4     | 91.0       | 0.21      |
| 3     | 10.512            | 46.271      | 2.515       | 8.2      | 6.5        | 0.26      |
| Total |                   | 566.690     | 38.585      | 100.0    | 100.0      |           |

### Crude HPLC Spectra of Compound 15e

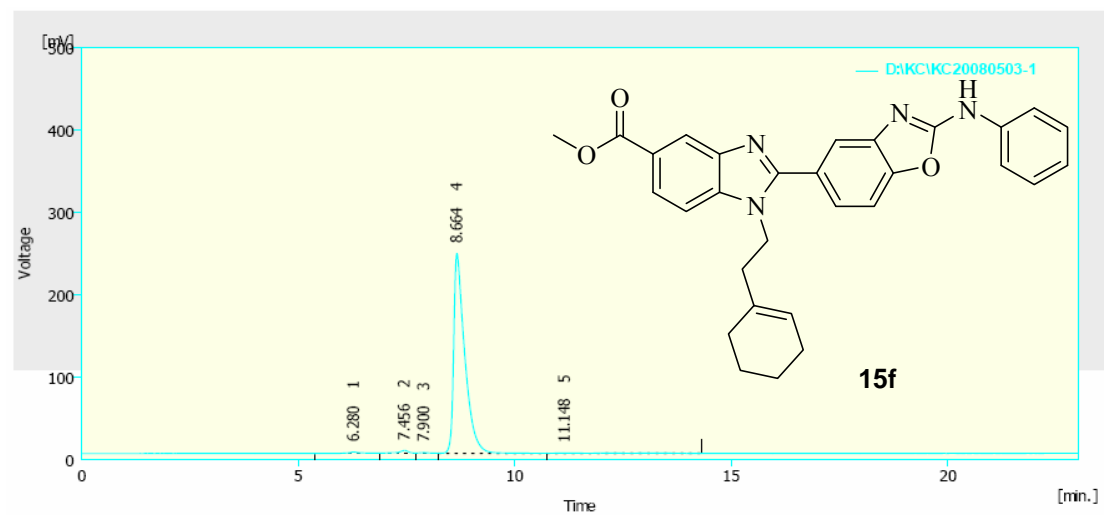

Result Table (Uncal - D:\KC\KC20080503-1)

|   | Reten. Time [min] | Area [mV.s] | Height [mV] | Area [%] | Height [%] | W05 [min] |
|---|-------------------|-------------|-------------|----------|------------|-----------|
| 1 | 6.280             | 41.406      | 1.800       | 0.9      | 0.7        | 0.26      |
| 2 | 7.456             | 67.098      | 3.705       | 1.5      | 1.5        | 0.21      |
| 3 | 7.900             | 19.332      | 1.072       | 0.4      | 0.4        | 0.28      |
| 4 | 8.664             | 4337.877    | 242.558     | 96.2     | 97.2       | 0.26      |
| 5 | 11.148            | 42.654      | 0.423       | 0.9      | 0.2        | 0.56      |
|   | Total             | 4508.367    | 249.558     | 100.0    | 100.0      |           |

### Crude HPLC Spectra of Compound 15f

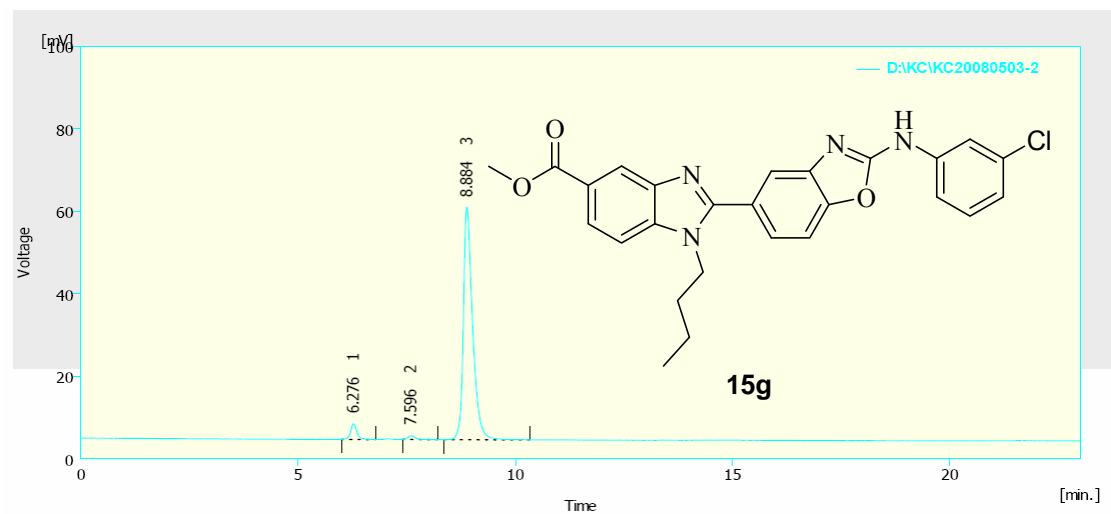

Result Table (Uncal - D:\KC\KC20080503-2)

|       | Reten. Time [min] | Area [mV.s] | Height [mV] | Area [%] | Height [%] | W05 [min] |
|-------|-------------------|-------------|-------------|----------|------------|-----------|
| 1     | 6.276             | 39.677      | 3.821       | 4.5      | 6.3        | 0.15      |
| 2     | 7.596             | 11.512      | 0.909       | 1.3      | 1.5        | 0.18      |
| 3     | 8.884             | 836.037     | 56.372      | 94.2     | 92.3       | 0.22      |
| Total |                   | 887.226     | 61.102      | 100.0    | 100.0      |           |

### Crude HPLC Spectra of Compound 15g

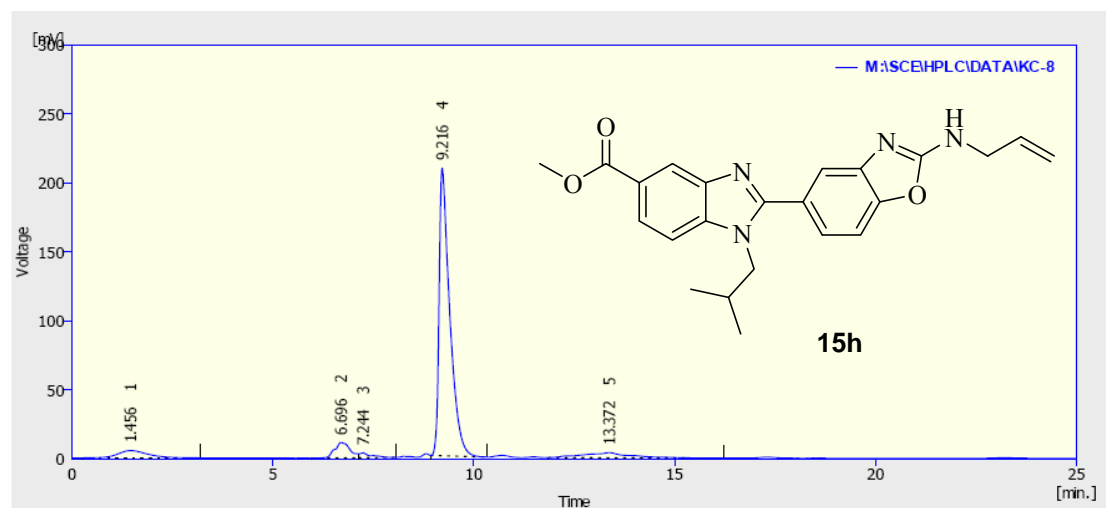

Result Table (Uncal - M: [SCE]HPLC [DATA] [KC-8])

|   | Reten. Time [min] | Area [mV.s] | Height [mV] | Area [%] | Height [%] | W05 [min] |
|---|-------------------|-------------|-------------|----------|------------|-----------|
| 1 | 1.456             | 282.773     | 5.362       | 5.9      | 2.3        | 0.78      |
| 2 | 6.696             | 297.736     | 11.159      | 6.2      | 4.8        | 0.44      |
| 3 | 7.244             | 69.912      | 3.476       | 1.5      | 1.5        | 0.23      |
| 4 | 9.216             | 3845.604    | 208.590     | 80.0     | 89.8       | 0.27      |
| 5 | 13.372            | 309.267     | 3.727       | 6.4      | 1.6        | 1.09      |
|   | Total             | 4805.292    | 232.315     | 100.0    | 100.0      |           |

### Crude HPLC Spectra of Compound 15h

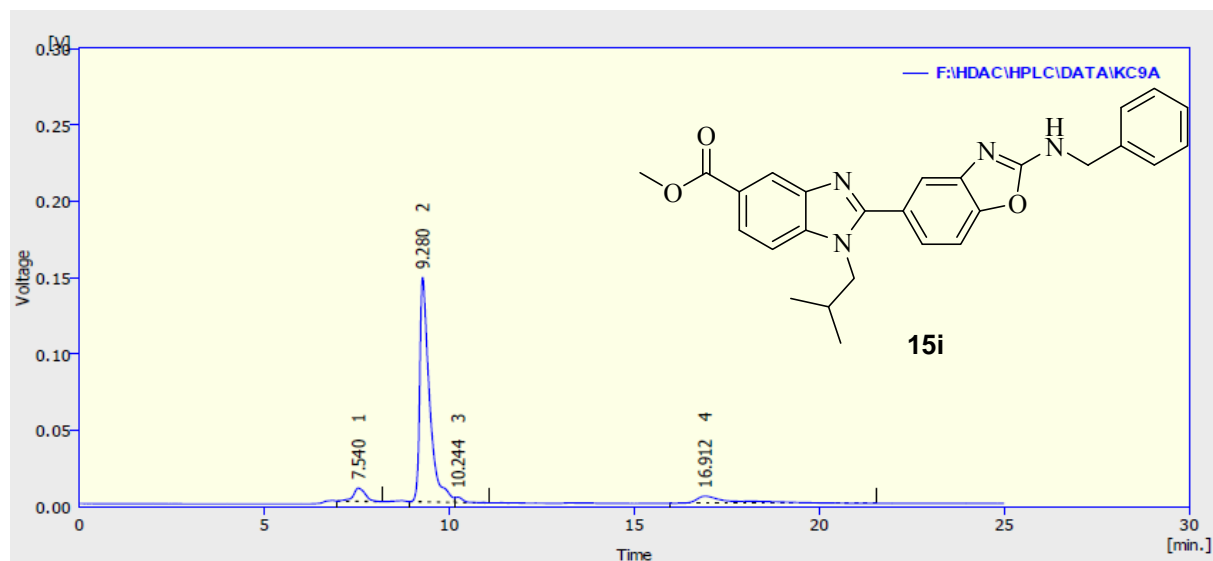

Result Table (Uncal - F:\HPLC\HPLC\DATA\KC9A)

|   | Reten. Time [min] | Area [mV.s] | Height [mV] | Area [%] | Height [%] | W05 [min] |
|---|-------------------|-------------|-------------|----------|------------|-----------|
| 1 | 7.540             | 195.148     | 8.655       | 5.9      | 5.3        | 0.33      |
| 2 | 9.280             | 2702.245    | 146.947     | 82.0     | 89.7       | 0.26      |
| 3 | 10.244            | 51.085      | 3.437       | 1.6      | 2.1        | 0.23      |
| 4 | 16.912            | 347.151     | 4.744       | 10.5     | 2.9        | 0.67      |
|   | Total             | 3295.629    | 163.783     | 100.0    | 100.0      |           |

### Crude HPLC Spectra of Compound 15i

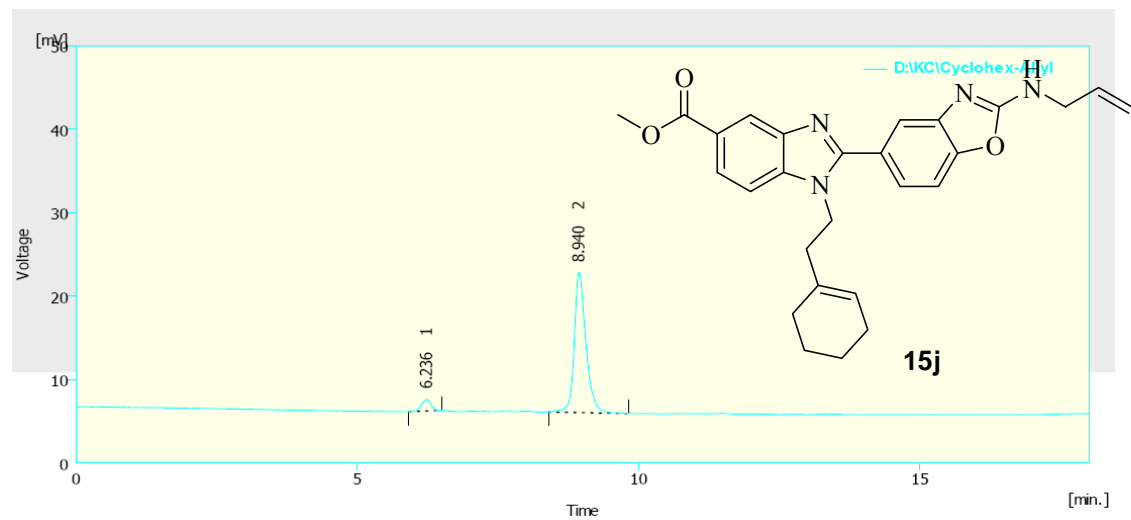

Result Table (Uncal - D:\KC\Cyclohex-Allyl)

|   | Reten. Time [min] | Area [mV.s] | Height [mV] | Area [%] | Height [%] | W05 [min] |
|---|-------------------|-------------|-------------|----------|------------|-----------|
| 1 | 6.236             | 16.068      | 1.367       | 6.2      | 7.5        | 0.19      |
| 2 | 8.940             | 242.098     | 16.808      | 93.8     | 92.5       | 0.21      |
|   | Total             | 258.166     | 18.175      | 100.0    | 100.0      |           |

### Crude HPLC Spectra of Compound 15j



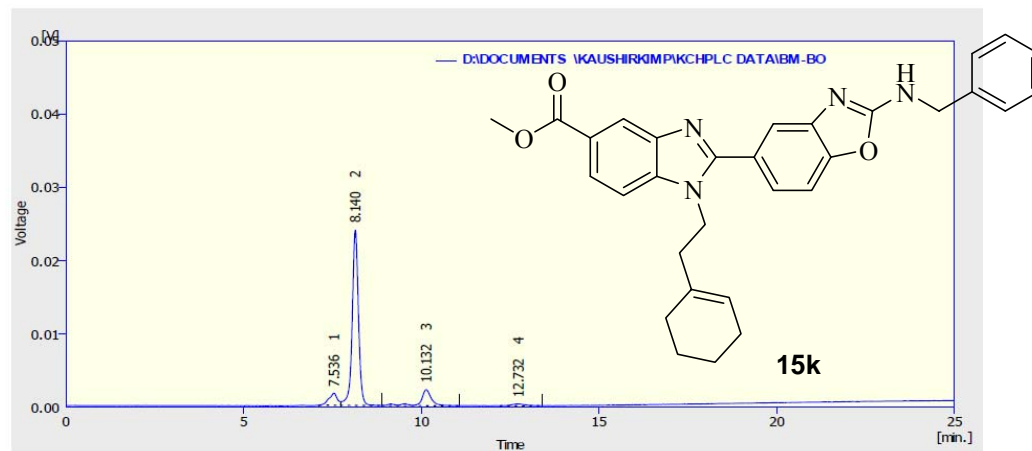

Result Table (Uncal - D:\DOCUMENTS\KAUSHIRKIMP\KCHPLC DATA\BM-BO)

|   | Reten. Time [min] | Area [mV.s] | Height [mV] | Area [%] | Height [%] | W05 [min] |
|---|-------------------|-------------|-------------|----------|------------|-----------|
| 1 | 7.536             | 27.189      | 1.636       | 7.3      | 5.8        | 0.27      |
| 2 | 8.140             | 294.262     | 23.943      | 79.0     | 85.4       | 0.18      |
| 3 | 10.132            | 44.222      | 2.185       | 11.9     | 7.8        | 0.25      |
| 4 | 12.732            | 6.847       | 0.256       | 1.8      | 0.9        | 0.37      |
|   | Total             | 372.519     | 28.020      | 100.0    | 100.0      |           |

### Crude HPLC Spectra of Compound 15k

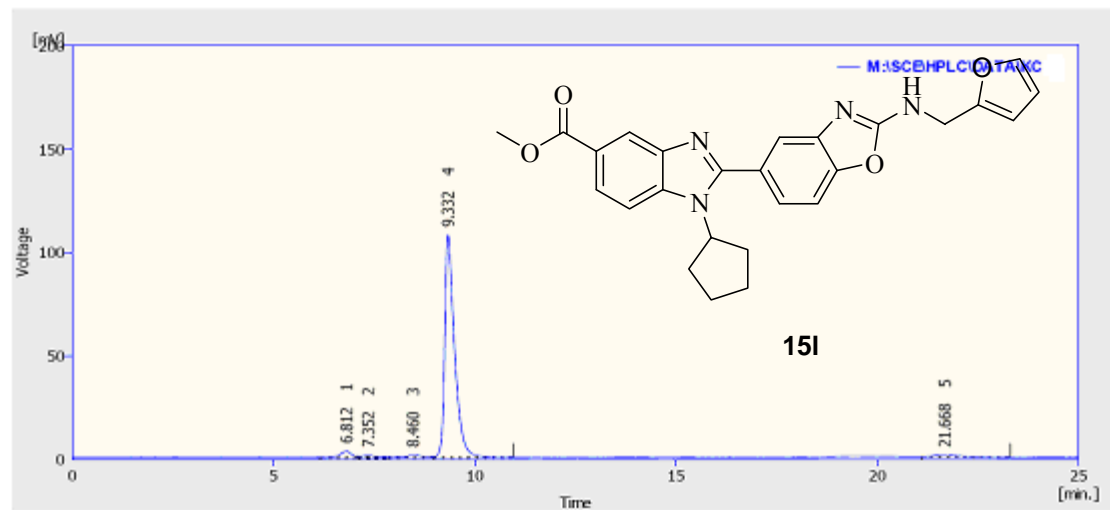

Result Table (Uncaf - M: [SCE]HPLC [DATA] KC

|   | Reten. Time [min] | Area [mV.s] | Height [mV] | Area [%] | Height [%] | W05 [min] |
|---|-------------------|-------------|-------------|----------|------------|-----------|
| 1 | 6.812             | 60.139      | 3.020       | 3.0      | 2.7        | 0.29      |
| 2 | 7.352             | 25.410      | 1.006       | 1.3      | 0.9        | 0.42      |
| 3 | 8.460             | 34.916      | 1.222       | 1.8      | 1.1        | 0.30      |
| 4 | 9.332             | 1819.470    | 107.475     | 92.0     | 94.7       | 0.25      |
| 5 | 21.668            | 38.463      | 0.727       | 1.9      | 0.6        | 0.76      |
|   | Total             | 1978.399    | 113.450     | 100.0    | 100.0      |           |

**Crude HPLC Spectra of Compound 151**

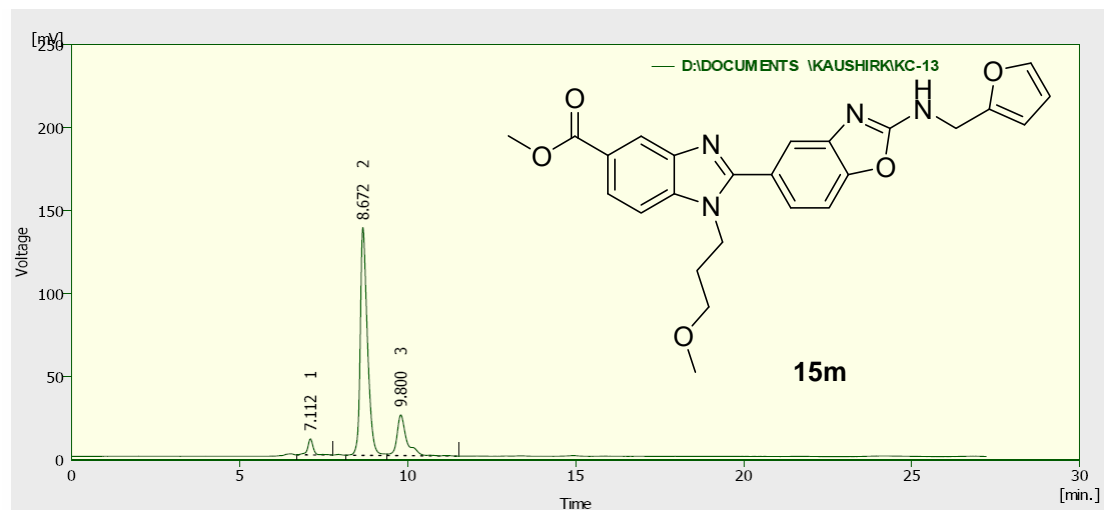

Result Table (Uncal - D:\DOCUMENTS \KAUSHIRK\KC-13)

|   | Reten. Time<br>[min] | Area<br>[mV.s] | Height<br>[mV] | Area<br>[%] | Height<br>[%] | W05<br>[min] |
|---|----------------------|----------------|----------------|-------------|---------------|--------------|
| 1 | 7.112                | 114.549        | 9.701          | 4.3         | 5.7           | 0.16         |
| 2 | 8.672                | 2037.194       | 137.056        | 76.7        | 80.0          | 0.22         |
| 3 | 9.800                | 503.670        | 24.499         | 19.0        | 14.3          | 0.26         |
|   | Total                | 2655.413       | 171.256        | 100.0       | 100.0         |              |

### Crude HPLC Spectra of Compound 15m

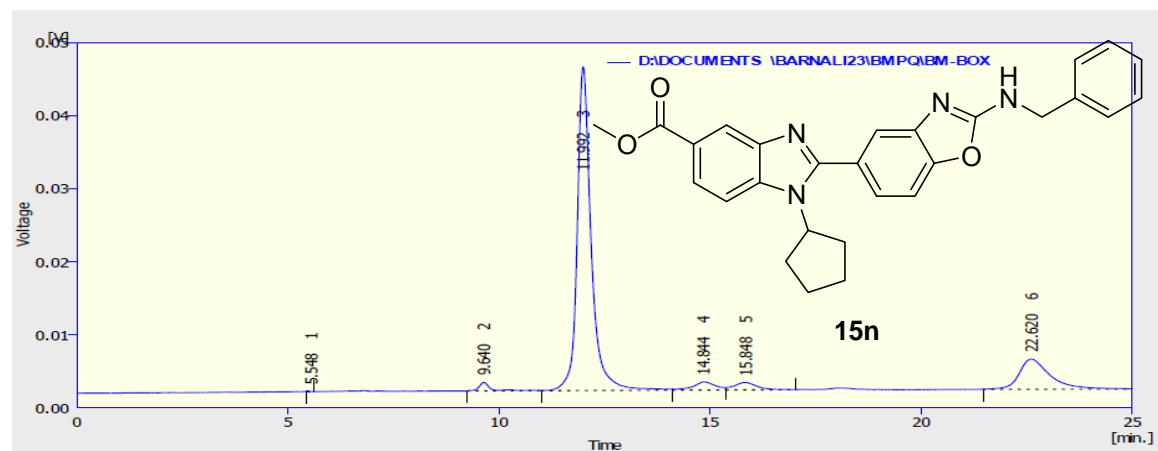

Result Table (Uncal - D: [DOCUMENTS] [BARNALI23] [BMPQ] [BM-BOX])

|   | Reten. Time<br>[min] | Area<br>[mV.s] | Height<br>[mV] | Area<br>[%] | Height<br>[%] | W05<br>[min] |
|---|----------------------|----------------|----------------|-------------|---------------|--------------|
| 1 | 5.548                | 0.282          | 0.048          | 0.0         | 0.1           | 0.05         |
| 2 | 9.640                | 22.762         | 1.182          | 1.7         | 2.3           | 0.22         |
| 3 | 11.992               | 1021.803       | 44.328         | 76.3        | 85.5          | 0.32         |
| 4 | 14.844               | 41.233         | 1.126          | 3.1         | 2.2           | 0.52         |
| 5 | 15.848               | 38.360         | 1.012          | 2.9         | 2.0           | 0.57         |
| 6 | 22.620               | 214.426        | 4.128          | 16.0        | 8.0           | 0.72         |
|   | Total                | 1338.866       | 51.824         | 100.0       | 100.0         |              |

### Crude HPLC Spectra of Compound 15n

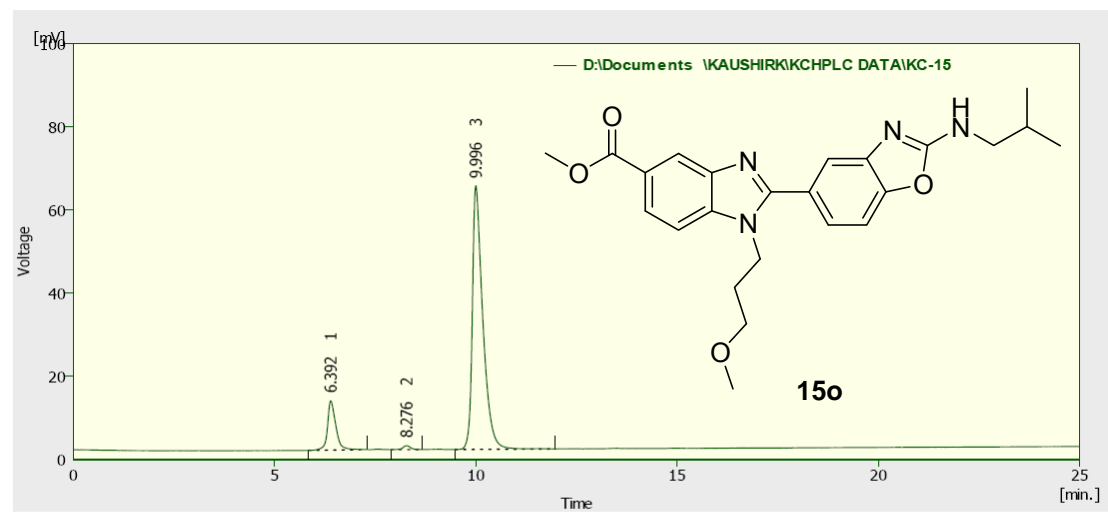

Result Table (Uncal - D:\Documents\KAUSHIRK\KCHPLC DATA\KC-15)

|   | Reten. Time<br>[min] | Area<br>[mV.s] | Height<br>[mV] | Area<br>[%] | Height<br>[%] | W05<br>[min] |
|---|----------------------|----------------|----------------|-------------|---------------|--------------|
| 1 | 6.392                | 170.136        | 11.846         | 12.8        | 15.6          | 0.21         |
| 2 | 8.276                | 12.574         | 0.952          | 0.9         | 1.3           | 0.19         |
| 3 | 9.996                | 1150.216       | 63.316         | 86.3        | 83.2          | 0.27         |
|   | Total                | 1332.926       | 76.114         | 100.0       | 100.0         |              |

### Crude HPLC Spectra of Compound 15o

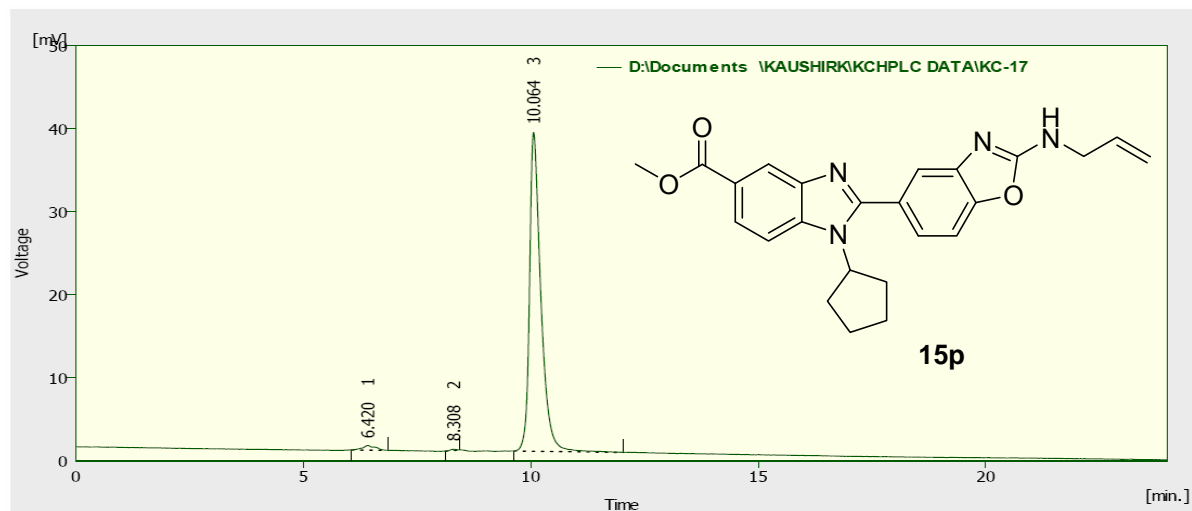

Result Table (Uncal - D:\Documents\KAUSHIRK\KCHPLC DATA\KC-17)

|   | Reten. Time [min] | Area [mV.s] | Height [mV] | Area [%] | Height [%] | W05 [min] |
|---|-------------------|-------------|-------------|----------|------------|-----------|
| 1 | 6.420             | 10.996      | 0.547       | 1.6      | 1.4        | 0.33      |
| 2 | 8.308             | 1.326       | 0.159       | 0.2      | 0.4        | 0.16      |
| 3 | 10.064            | 666.548     | 38.359      | 98.2     | 98.2       | 0.25      |
|   | Total             | 678.870     | 39.066      | 100.0    | 100.0      |           |

### Crude HPLC Spectra of Compound 15p

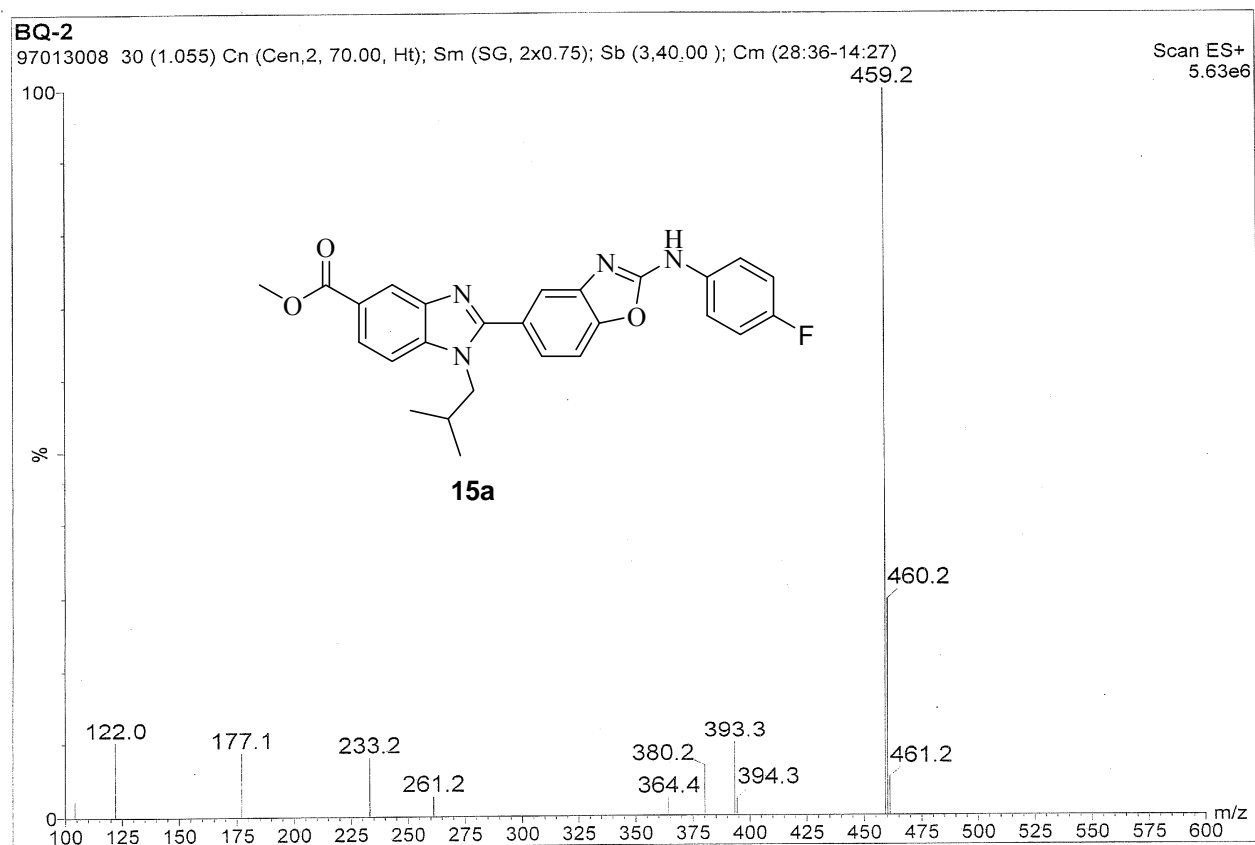

**LR Mass Spectra of Compound 15a**

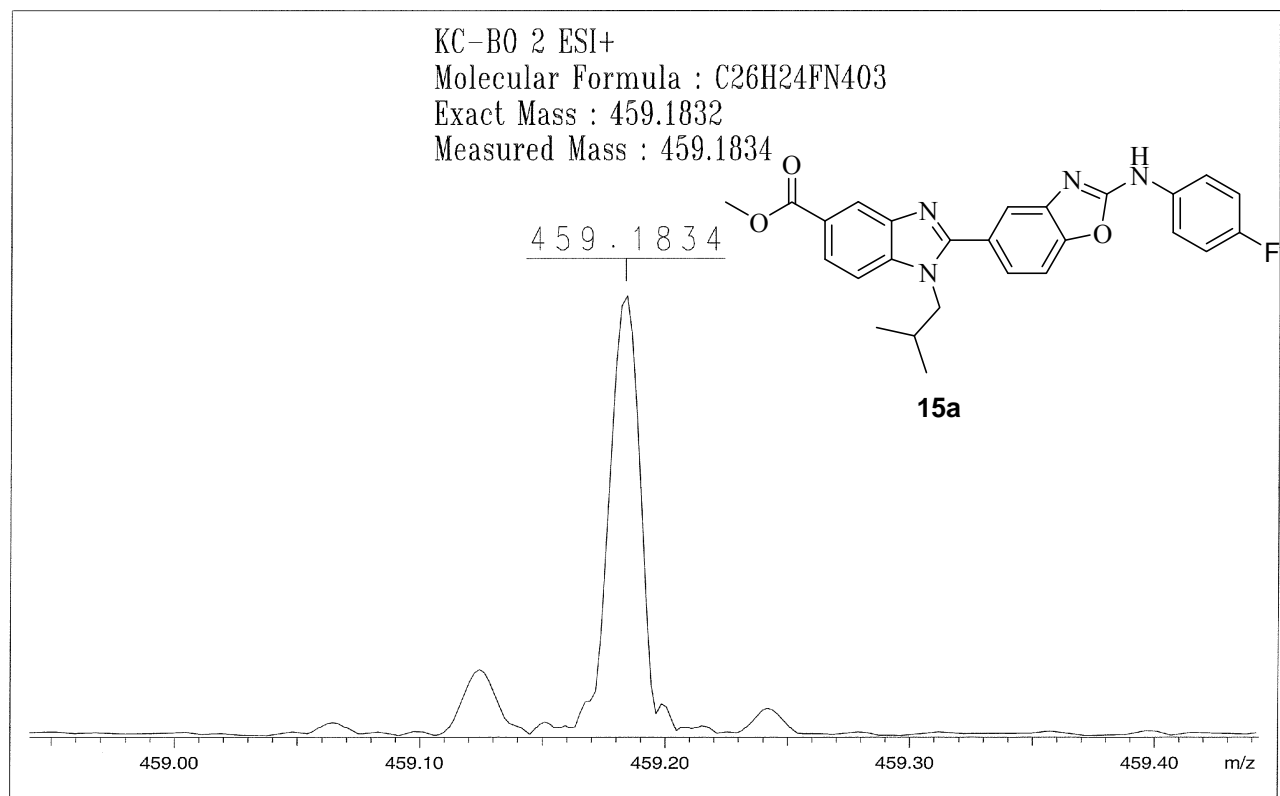

/d=/Data/yl/KCBO2/1/pdata/1 Administrator Thu Aug 7 15:22:16 2008

### HR Mass Spectra of Compound 15a



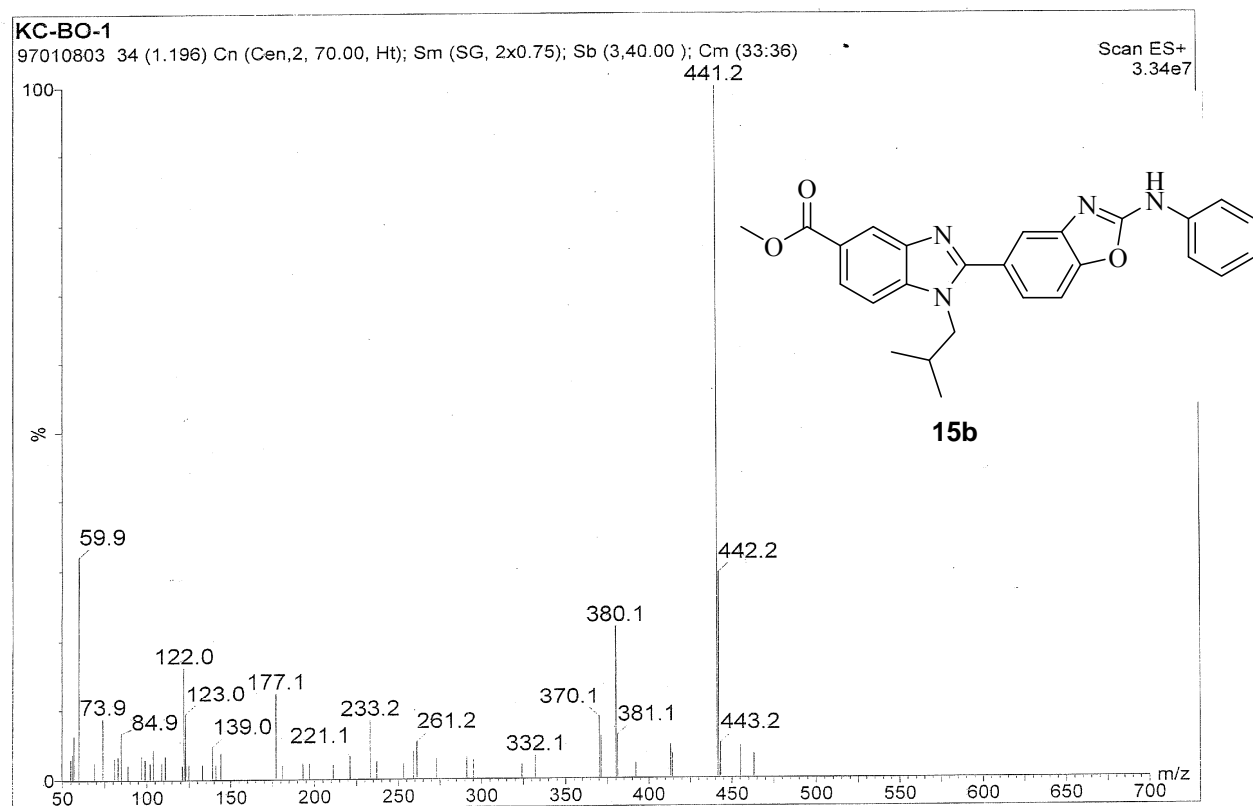

**LR Mass Spectra of Compound 15b**

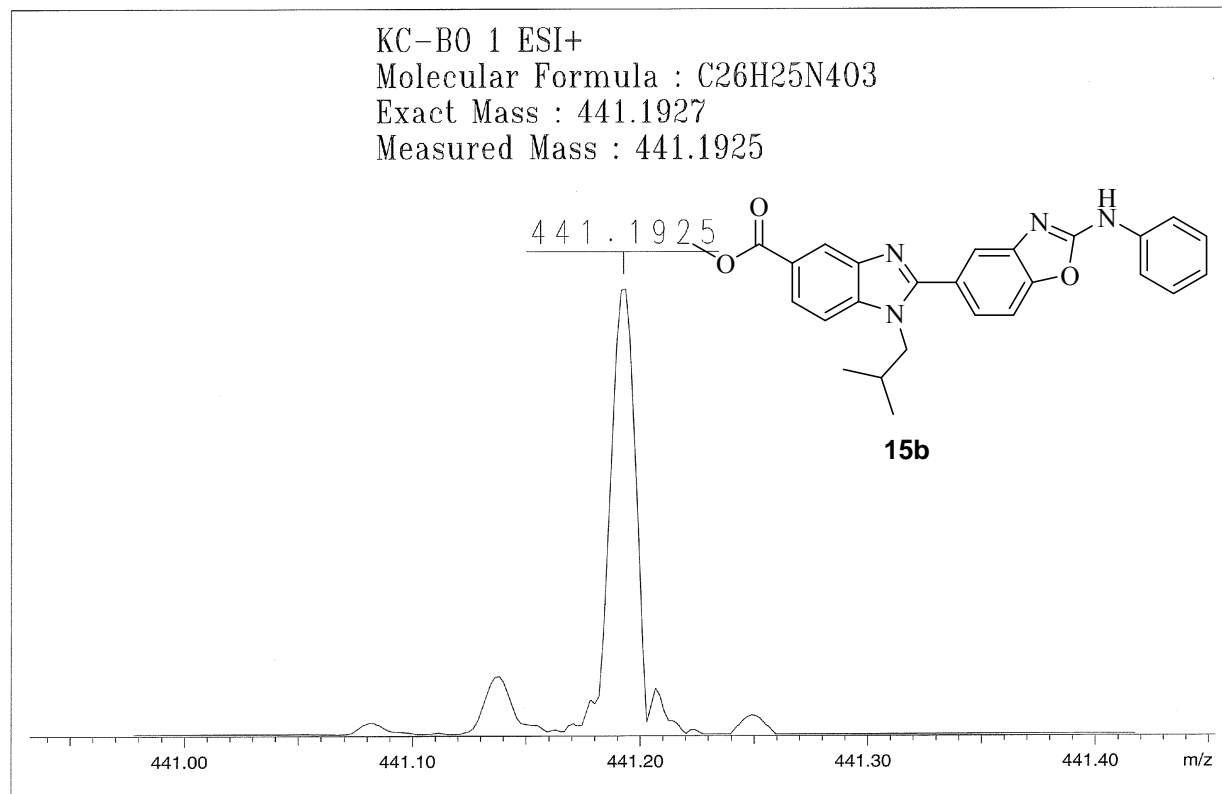

/d=/Data/yl/KCBO1/2/pdata/1 Administrator Thu Aug 7 15:16:20 2008

### HR Mass Spectra of Compound 15b

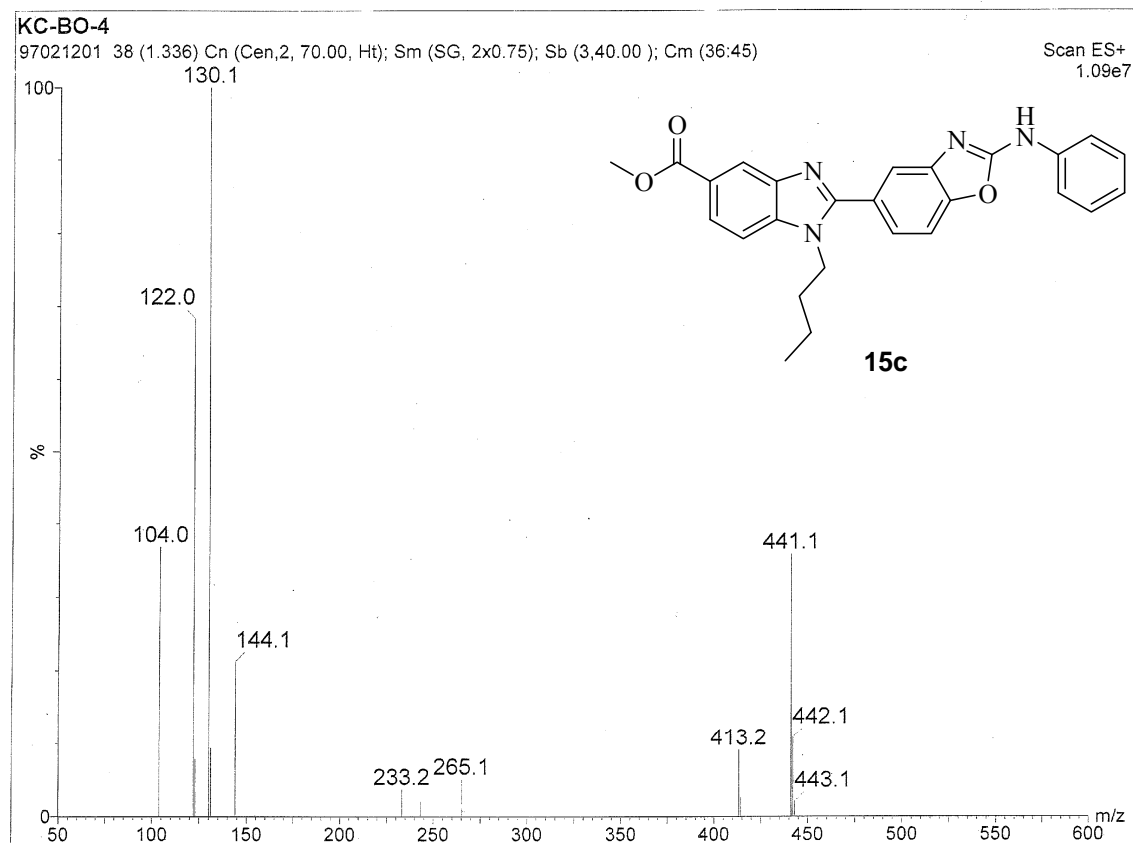

LR Mass Spectra of Compound 15c

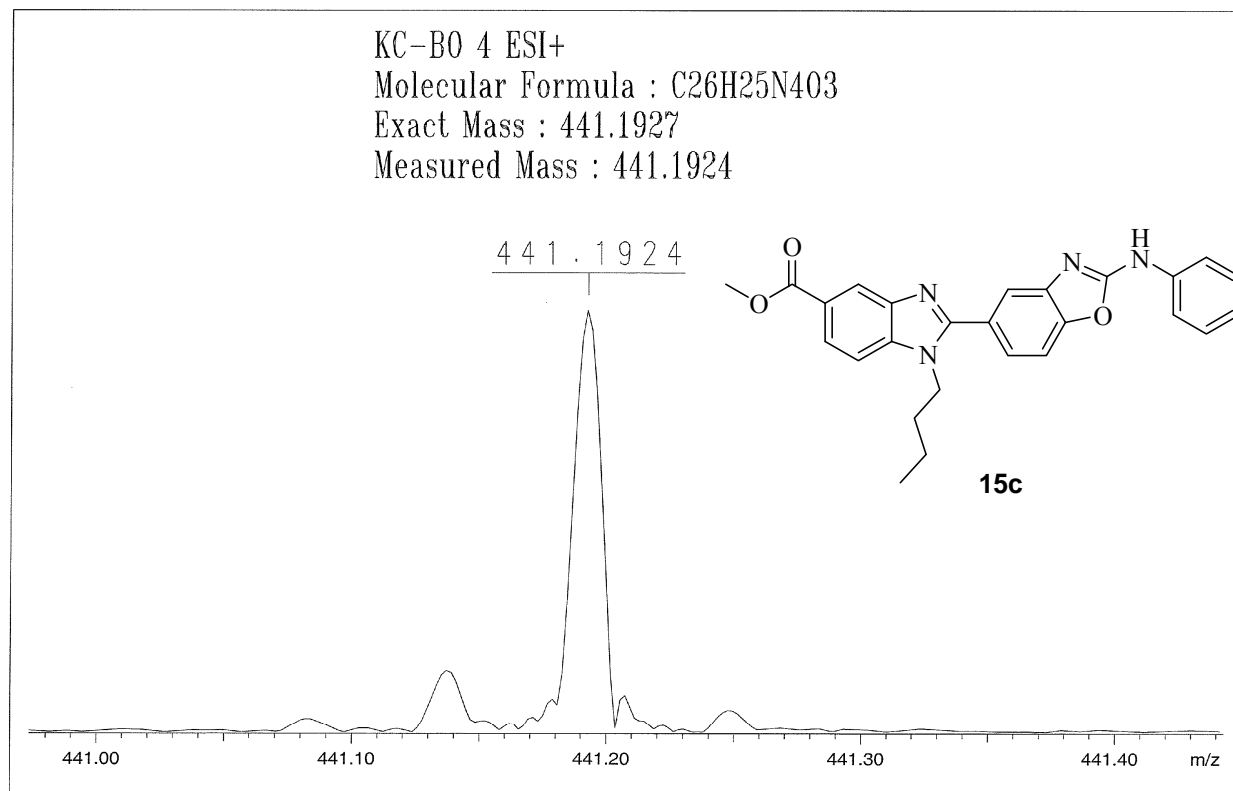

/d=/Data/yy/KCBO4/1/pdata/1 Administrator Thu Aug 7 15:28:07 2008

### HR Mass Spectra of Compound 15c

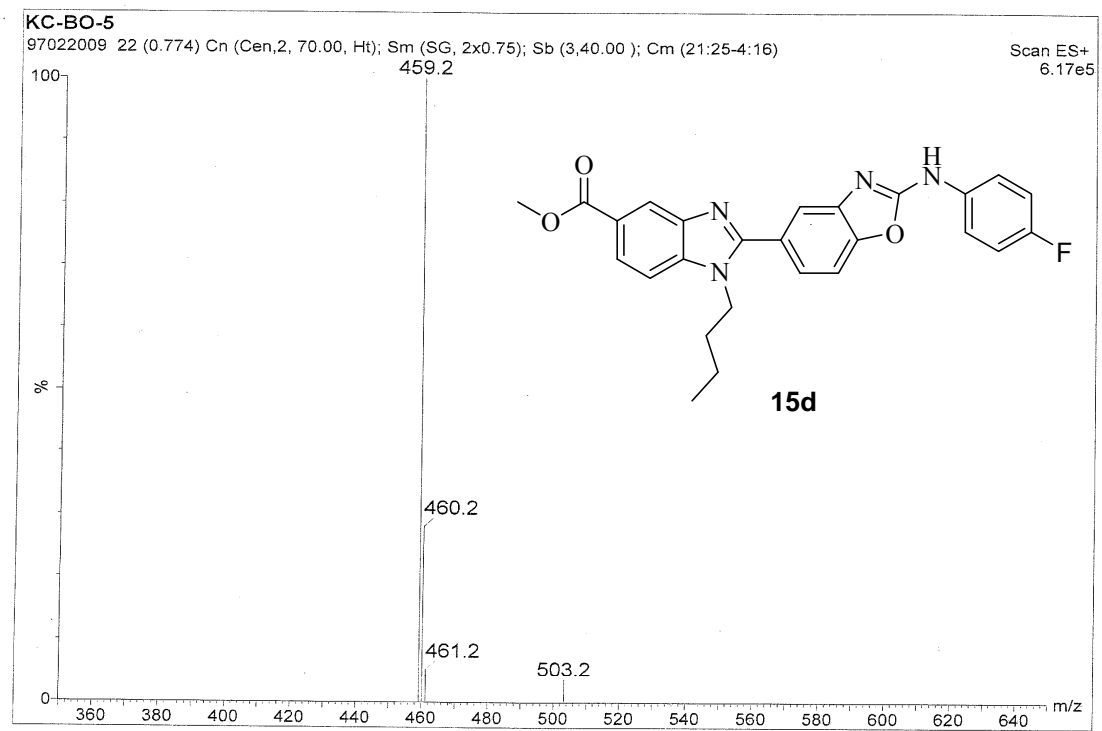

**LR Mass Spectra of Compound 15d**

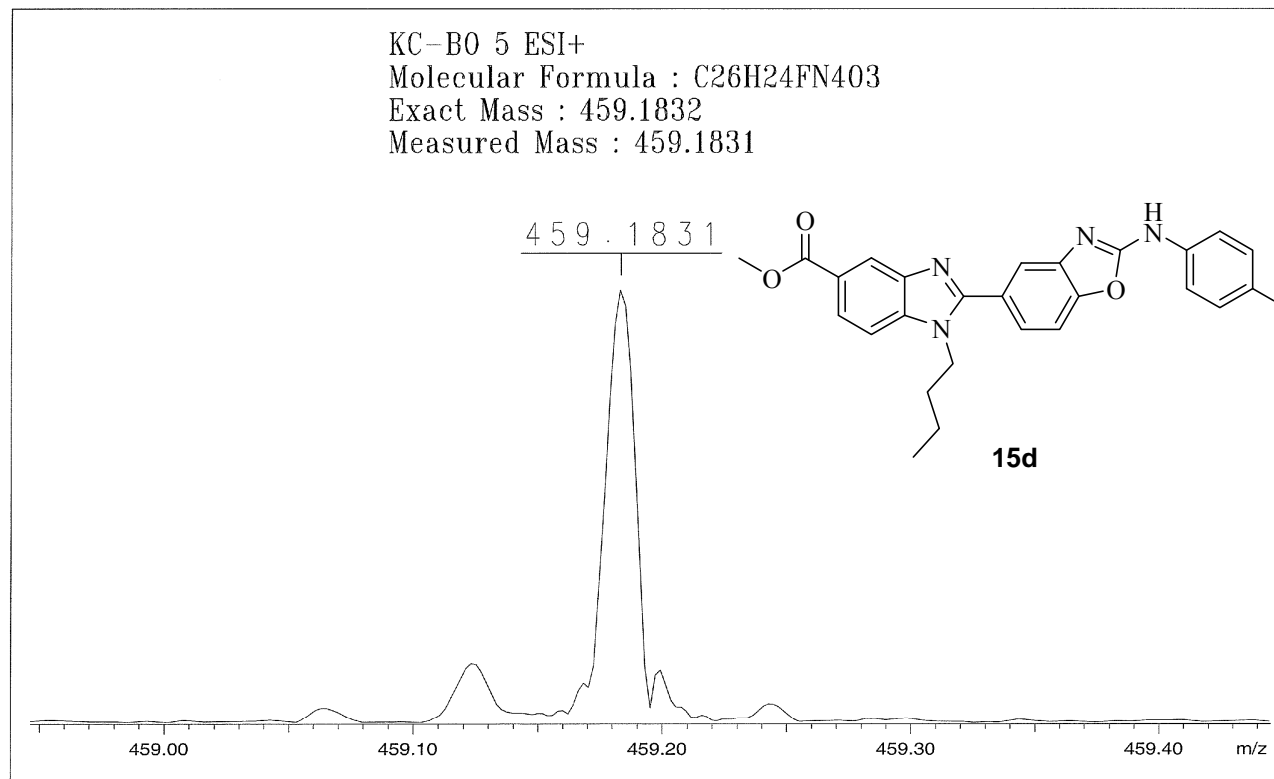

/d=/Data/yl/KCBO5/1/pdata/1 Administrator Thu Aug 7 15:34:26 2008

### HR Mass Spectra of Compound 15d

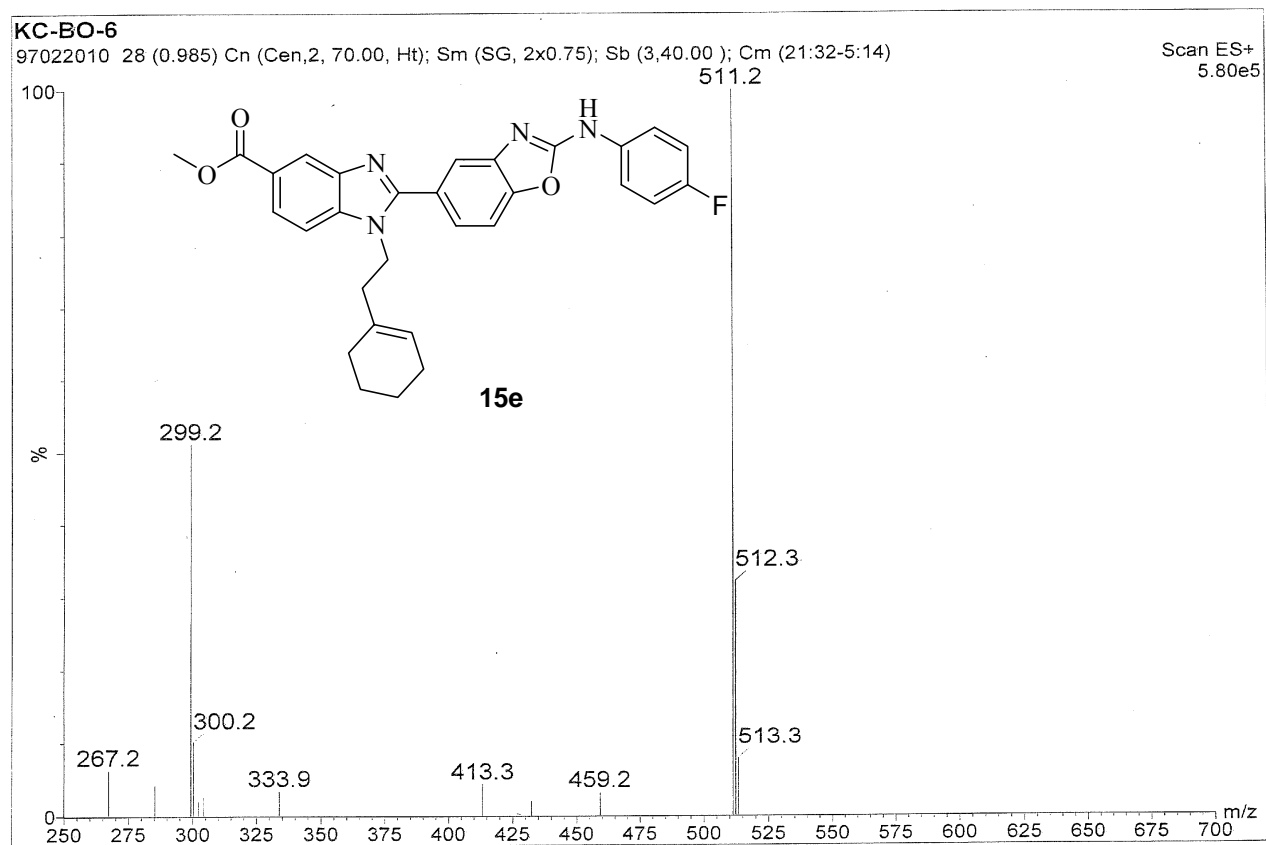

LR Mass Spectra of Compound 15e

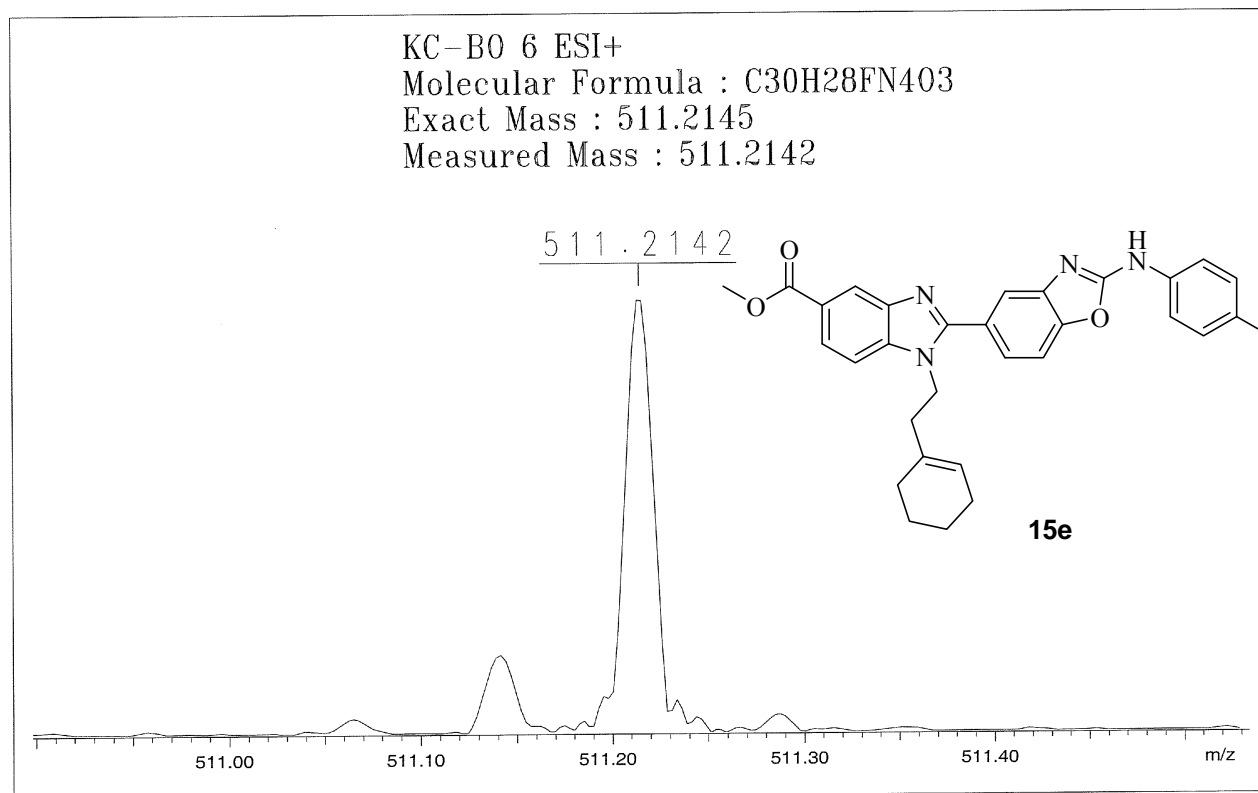

/d=/Data/yl/KCBO6/1/pdata/1 Administrator Thu Aug 7 15:46:33 2008

### HR Mass Spectra of Compound 15e



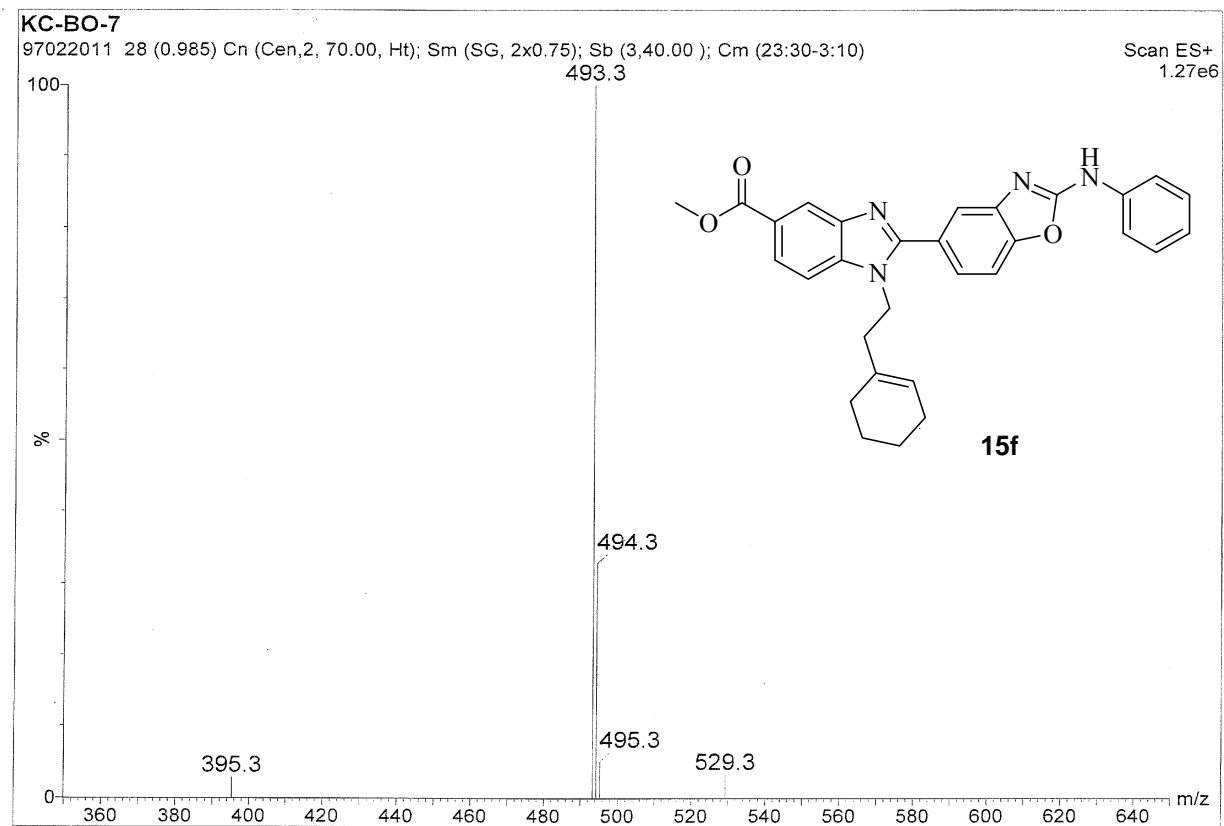

**LR Mass Spectra of Compound 15f**

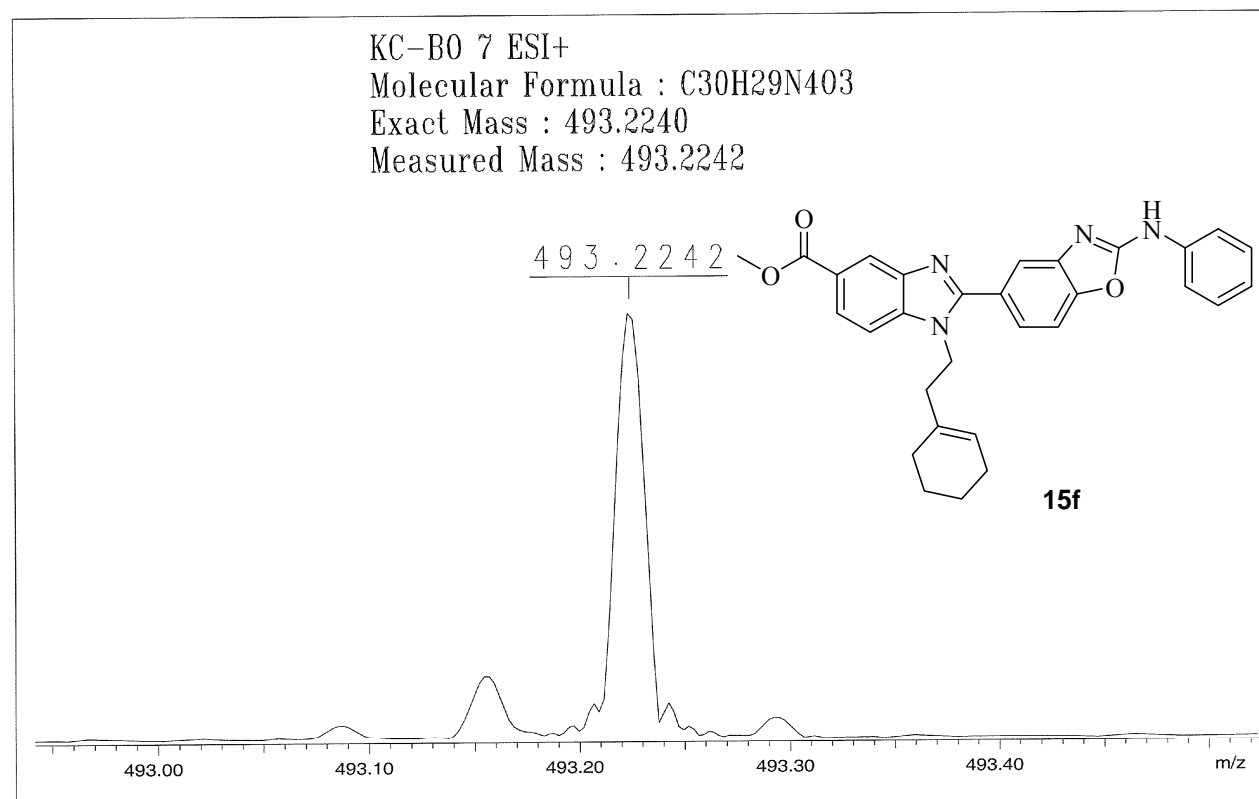

/d=/Data/yl/KCBO7/1/pdata/1 Administrator Thu Aug 7 15:40:56 2008

### HR Mass Spectra of Compound 15f

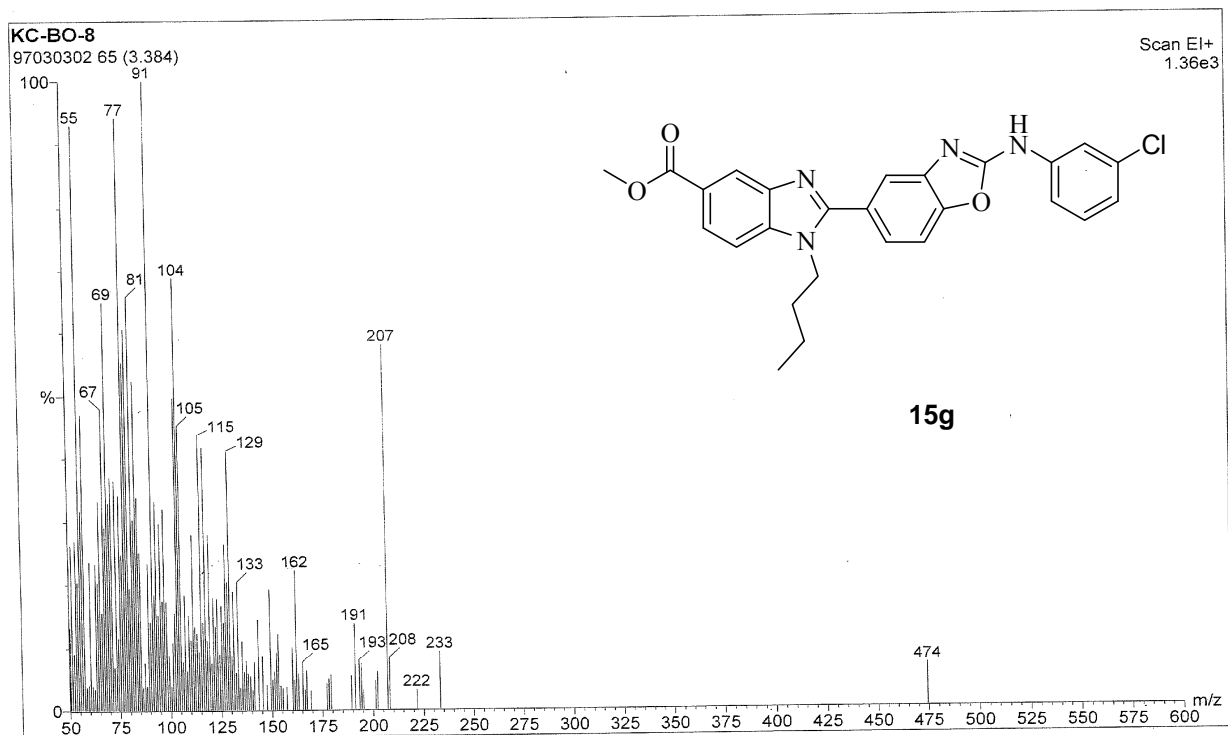

**LR Mass Spectra of Compound 15g**

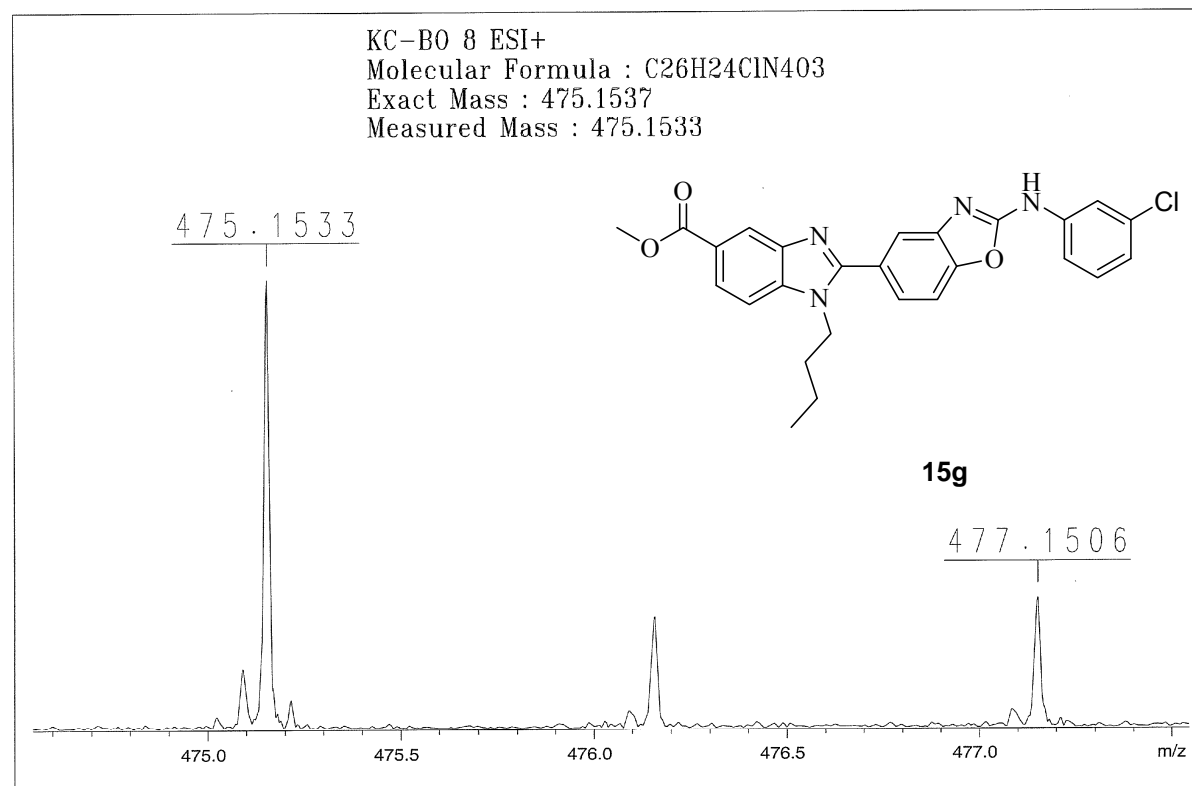

/d=/Data/yy/KCBO8/2/pdata/1 Administrator Thu Aug 7 16:50:16 2008

### HR Mass Spectra of Compound 15g

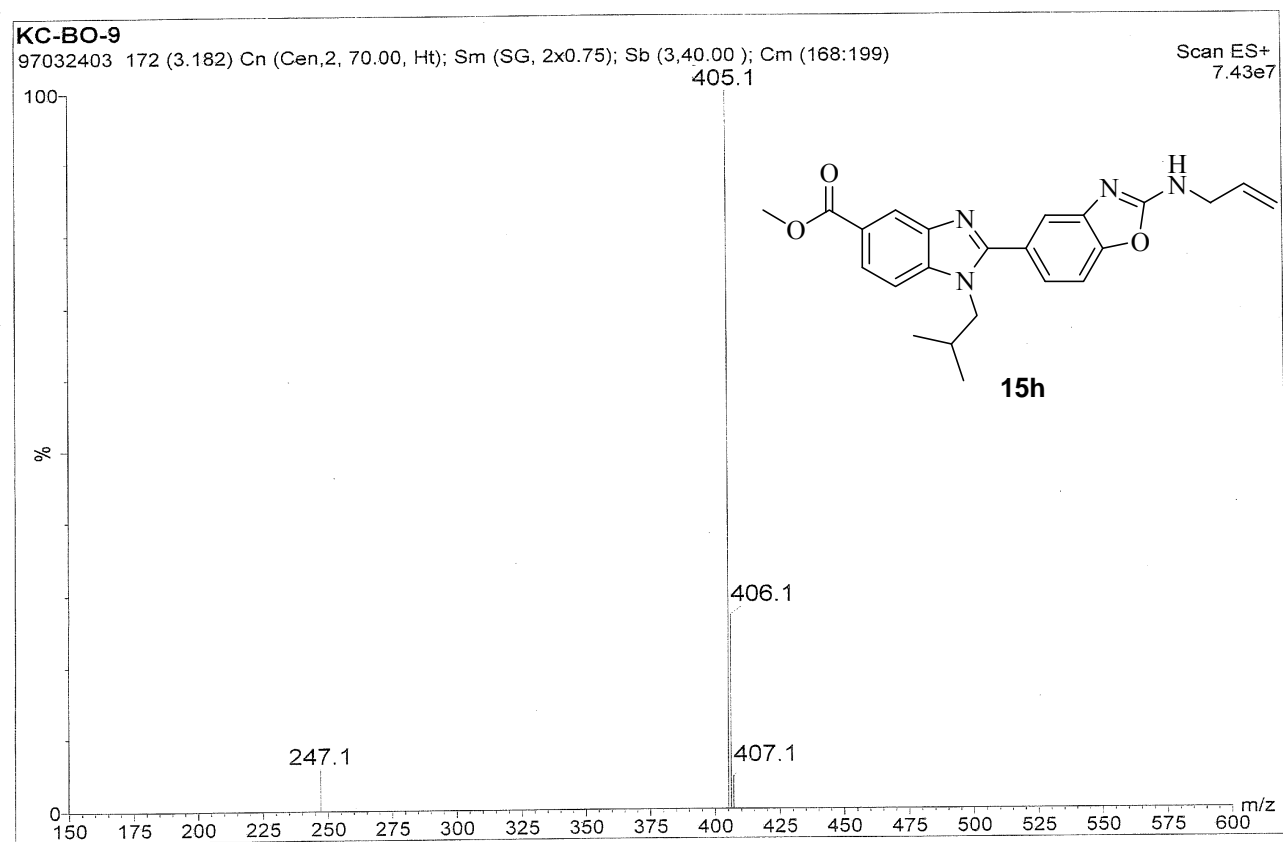

LR Mass Spectra of Compound 15h

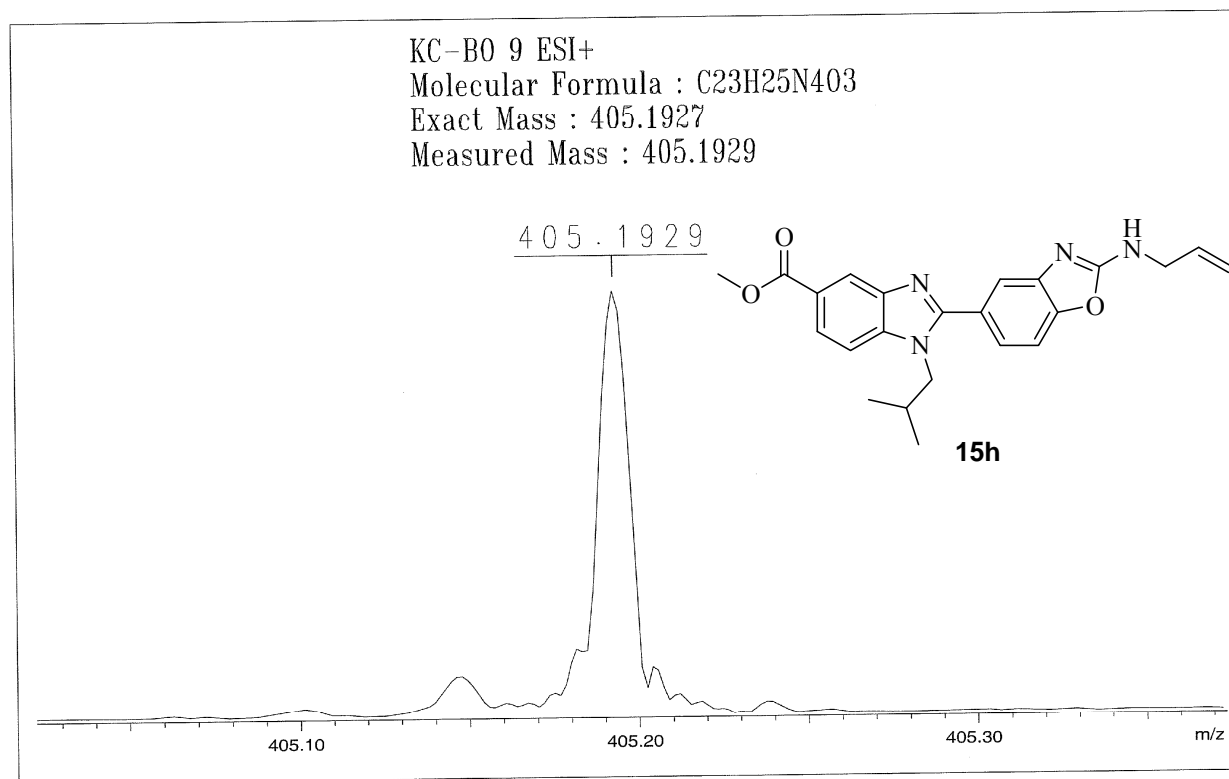

/d=/Data/yy/KCBO9/1/pdata/1 Administrator Thu Aug 7 16:56:26 2008

### HR Mass Spectra of Compound 15h

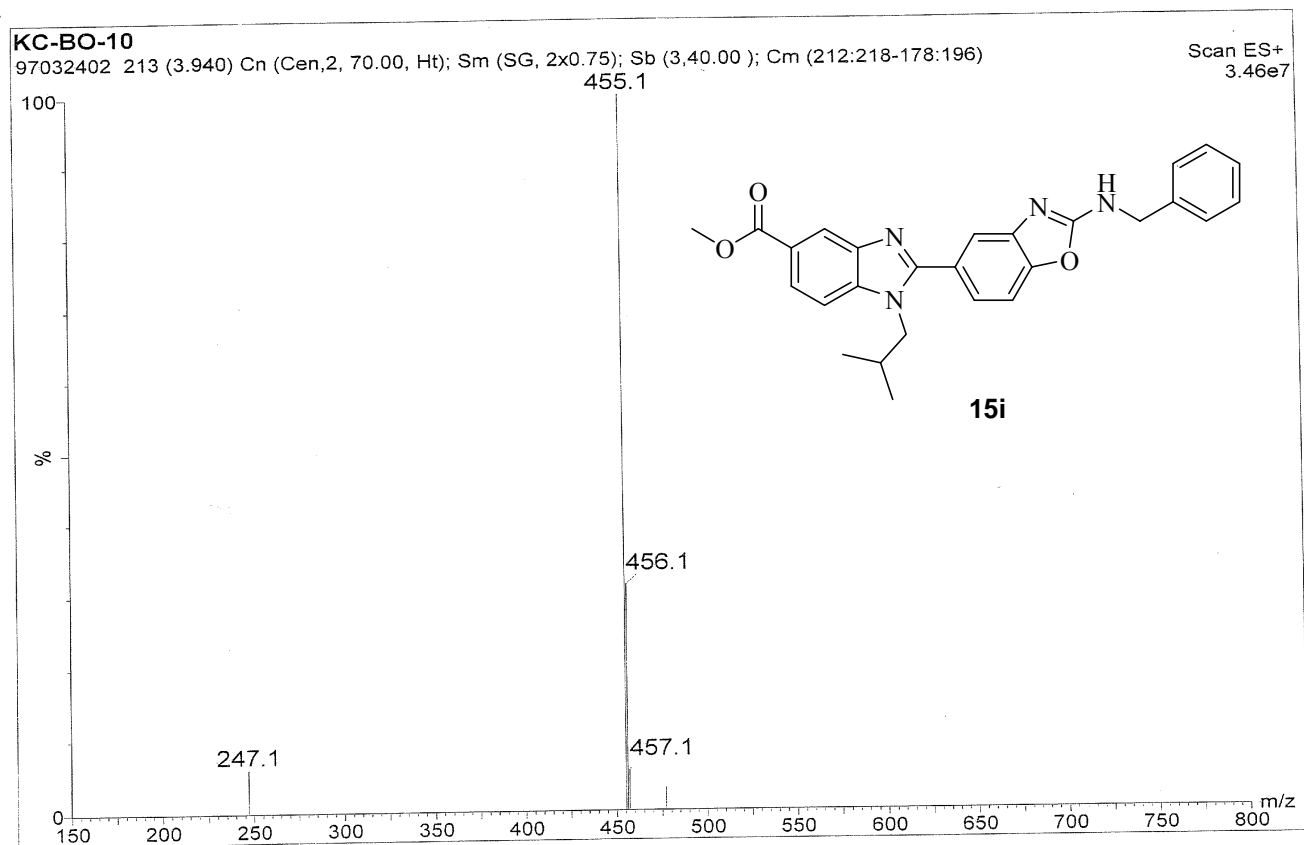

**LR Mass Spectra of Compound 15i**

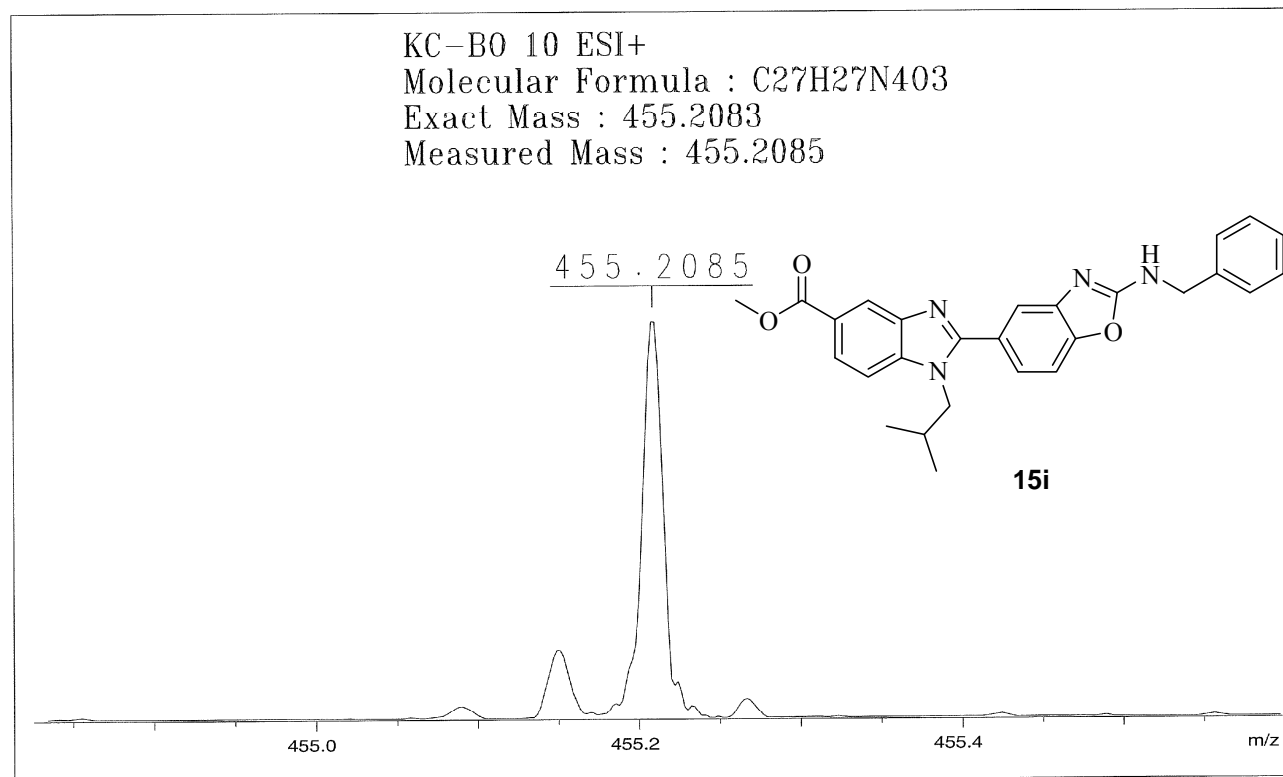

/d=/Data/yl/KCBO10/1/pdata/1 Administrator Thu Aug 7 17:15:41 2008

### HR Mass Spectra of Compound 15i



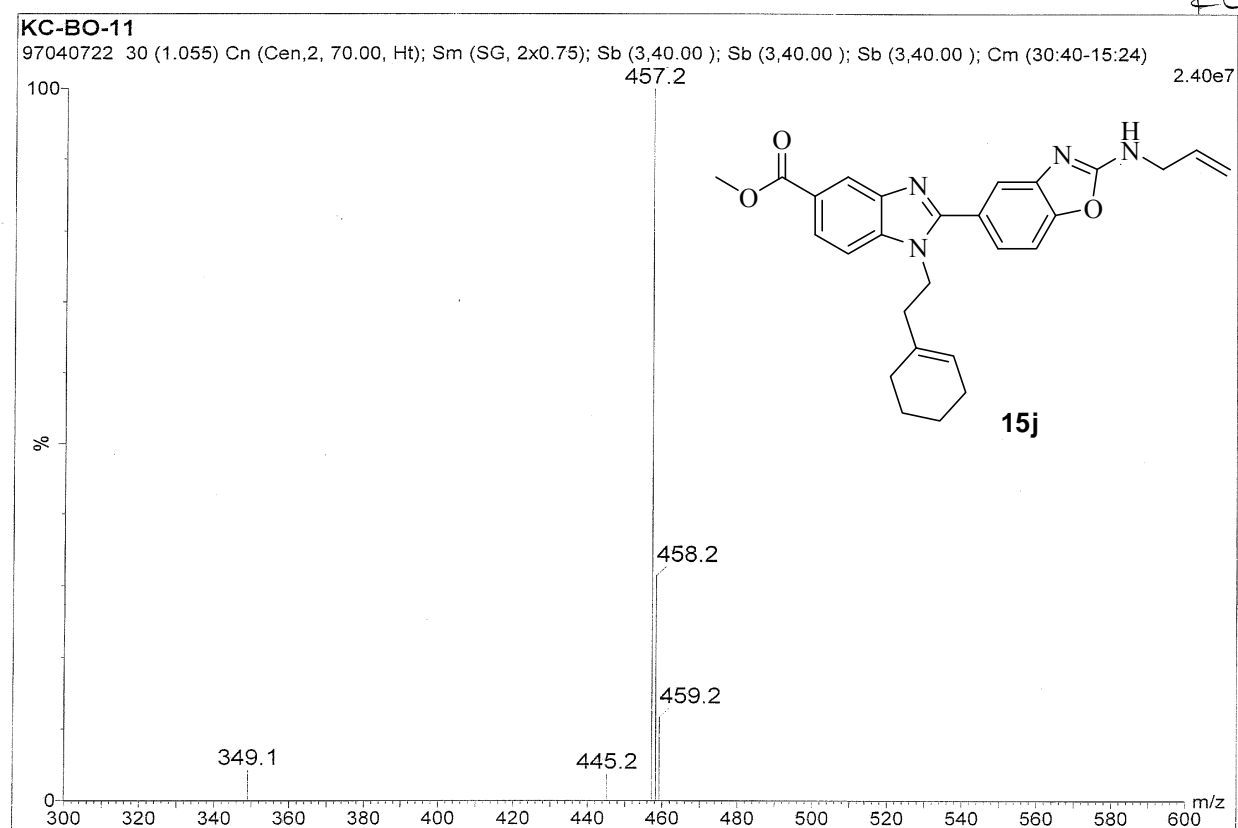

**LR Mass Spectra of Compound 15j**

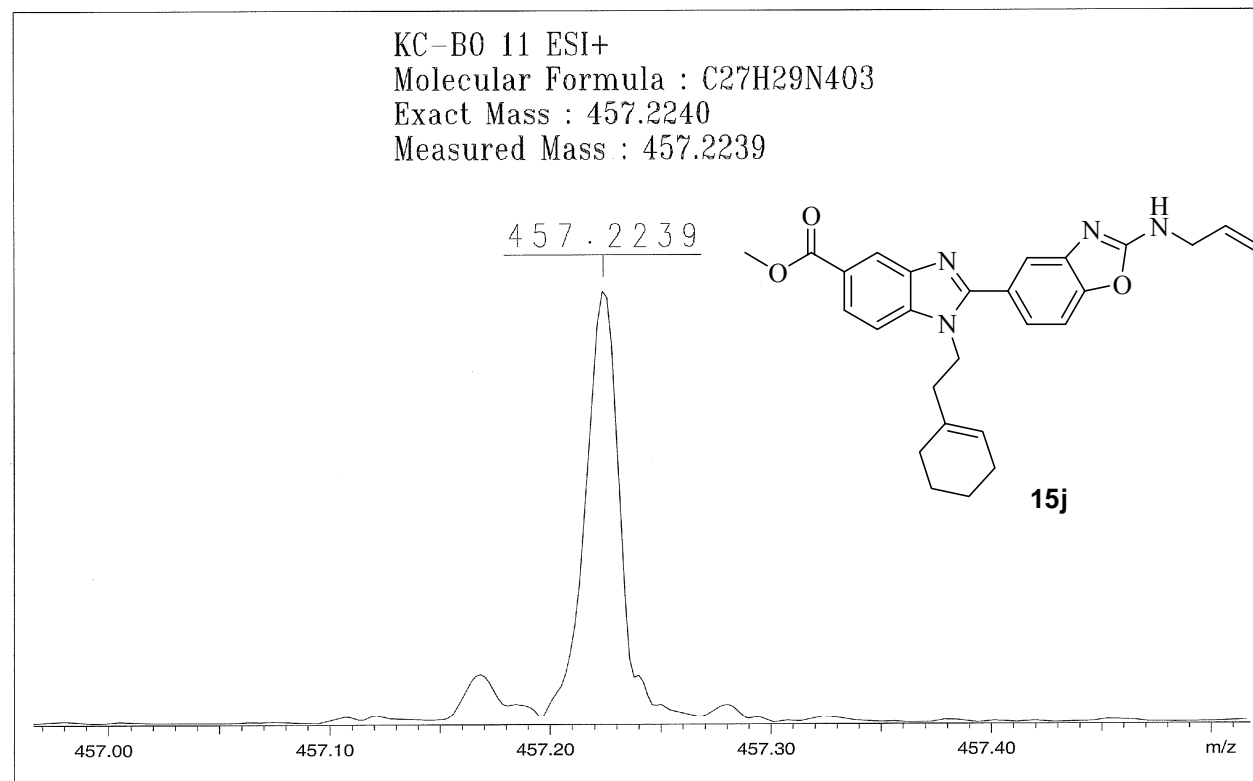

/d=/Data/yl/KCBO11/1/pdata/1 Administrator Thu Aug 7 17:23:48 2008

### HR Mass Spectra of Compound 15j

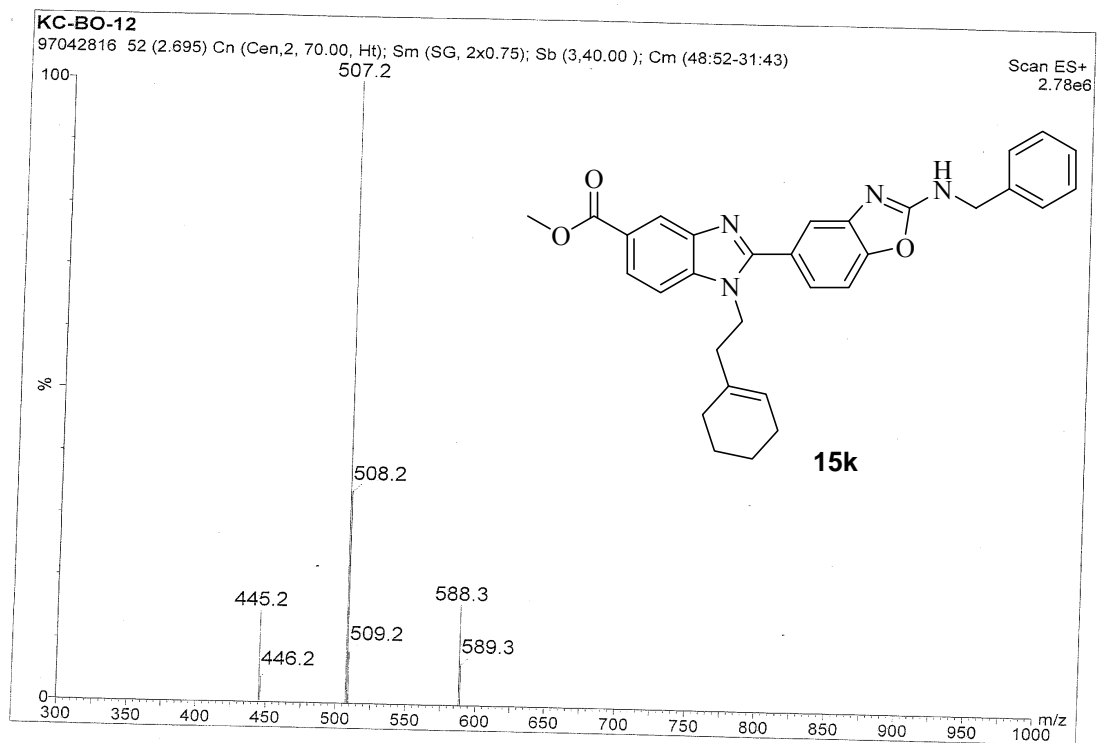

**LR Mass Spectra of Compound 15k**

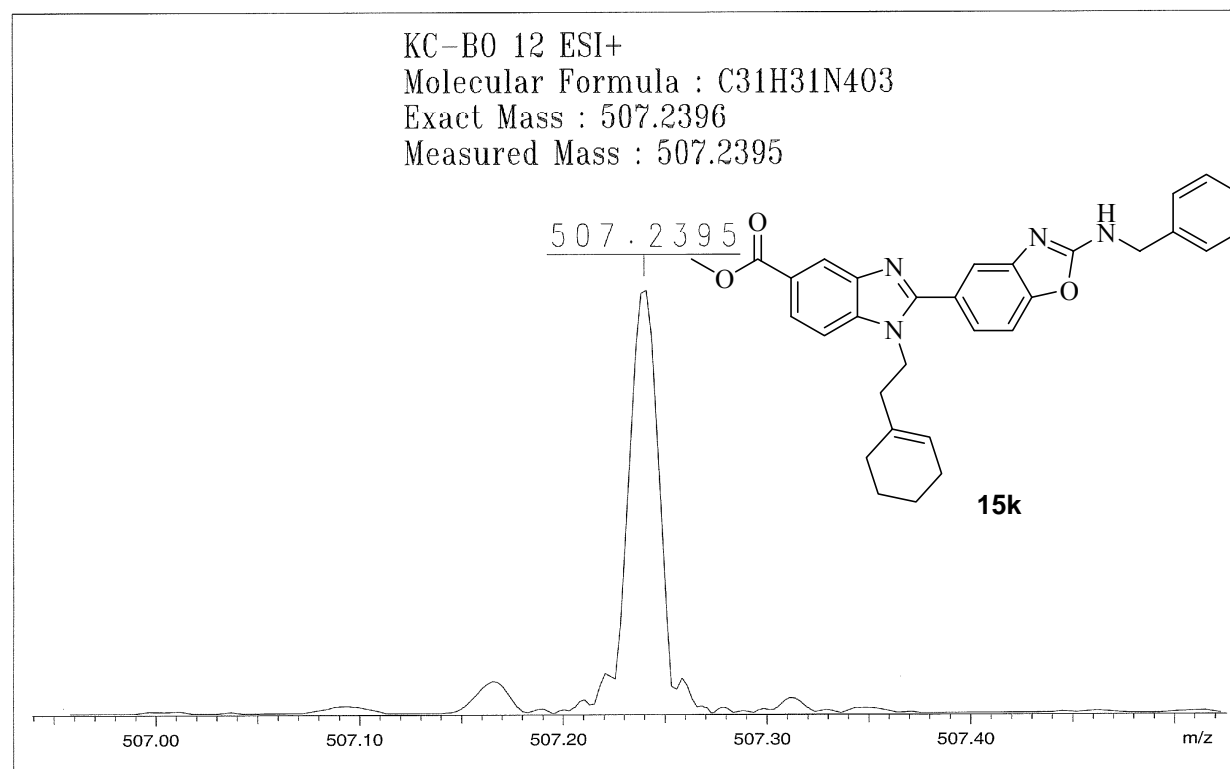

/d=/Data/yl/KCBO12/2/pdata/1 Administrator Fri Aug 8 11:09:35 2008

### HR Mass Spectra of Compound 15k

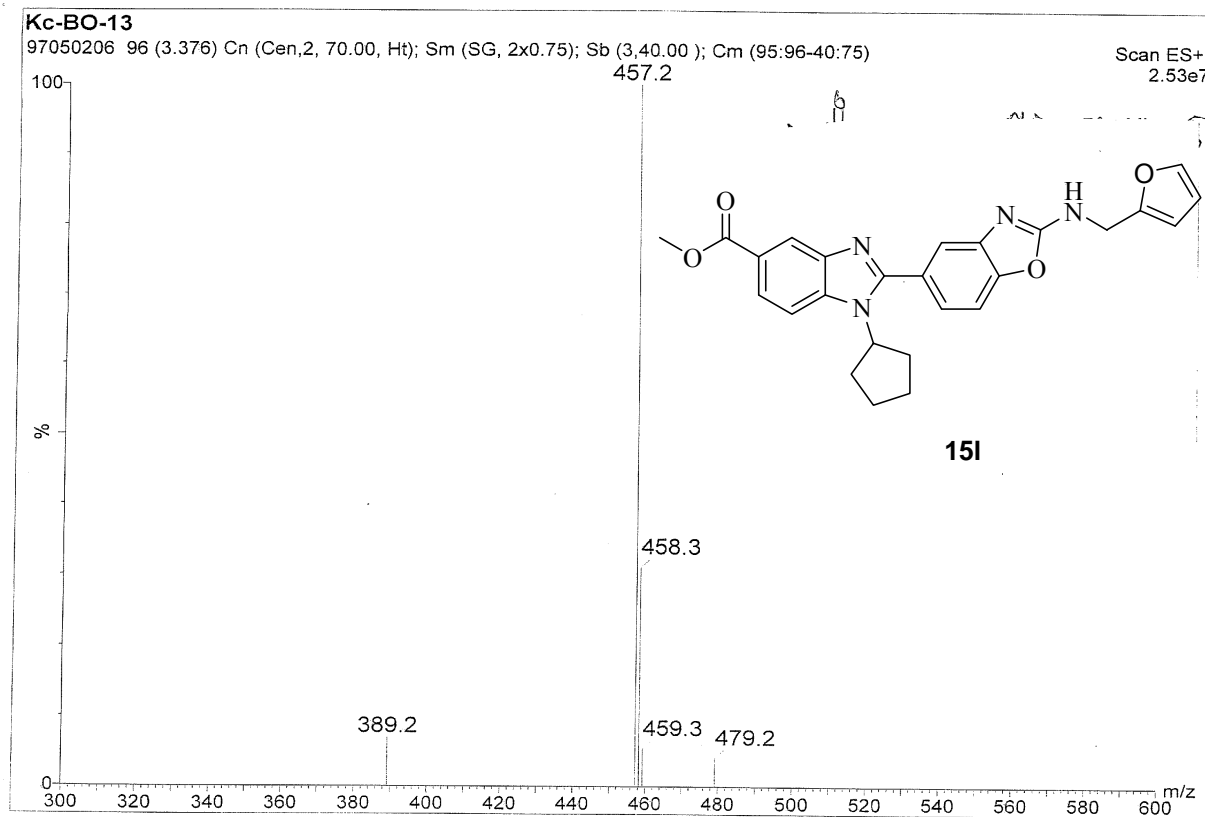

**LR Mass Spectra of Compound 15l**

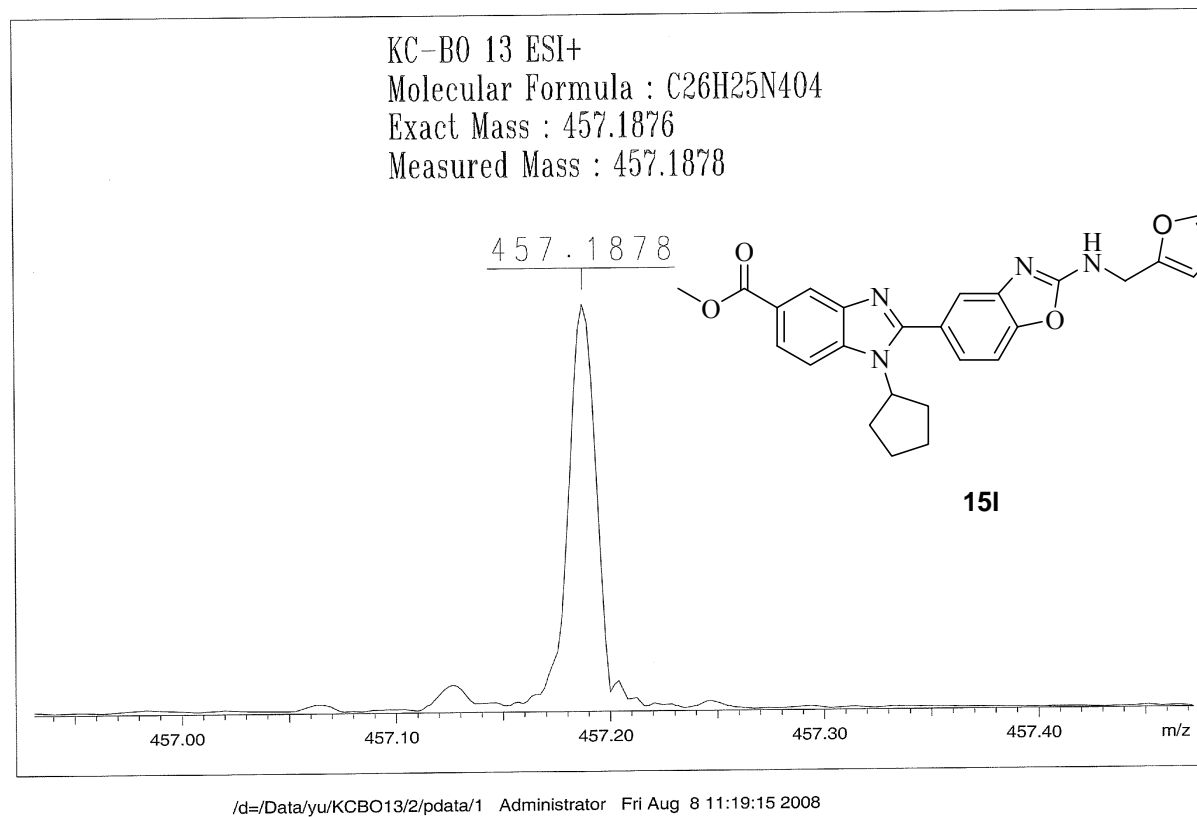

### HR Mass Spectra of Compound 15I

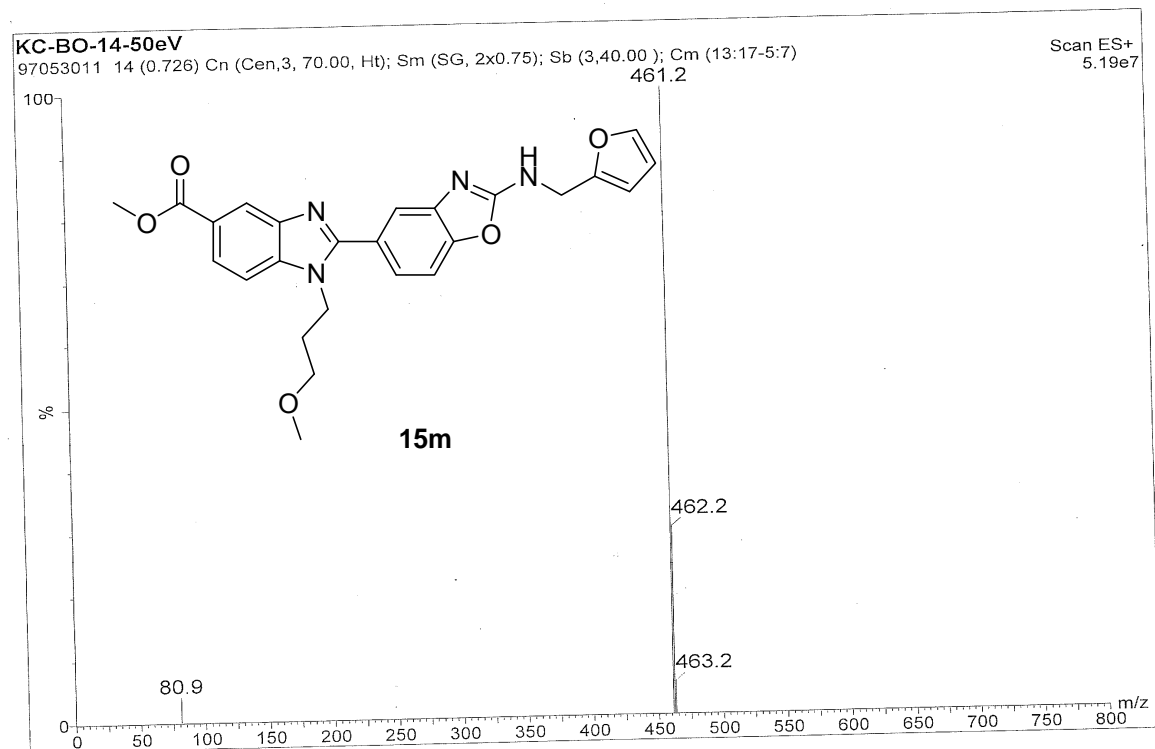

**LR Mass Spectra of Compound 15m**

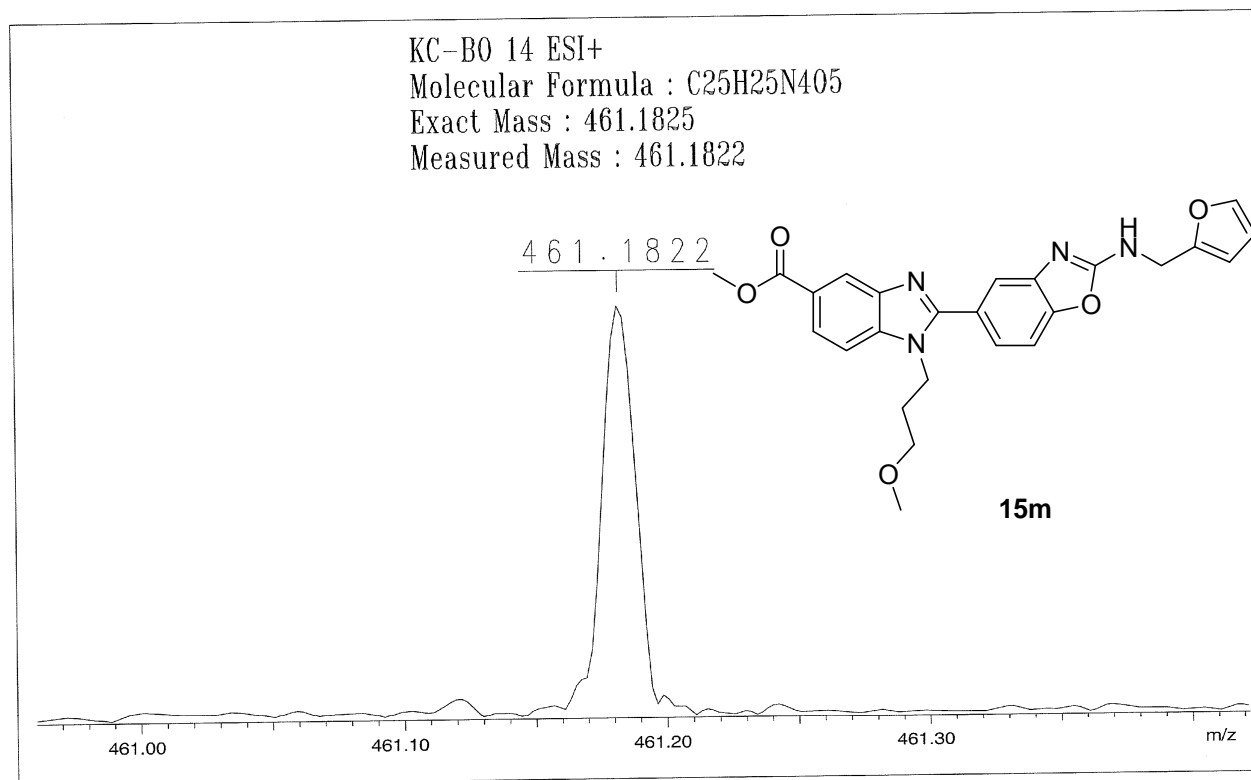

/d=/Data/you/KCBO14/2/pdata/1 Administrator Fri Aug 8 11:28:30 2008

### HR Mass Spectra of Compound 15m



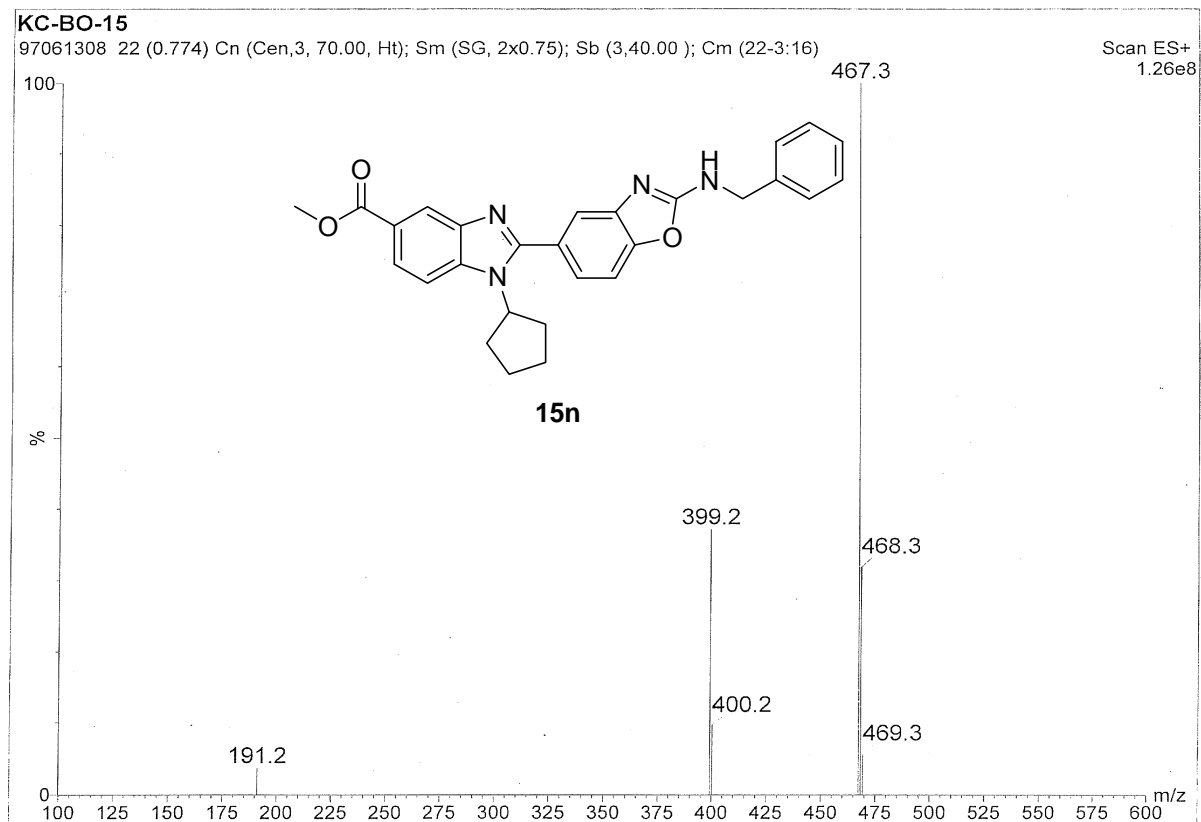

**LR Mass Spectra of Compound 15n**

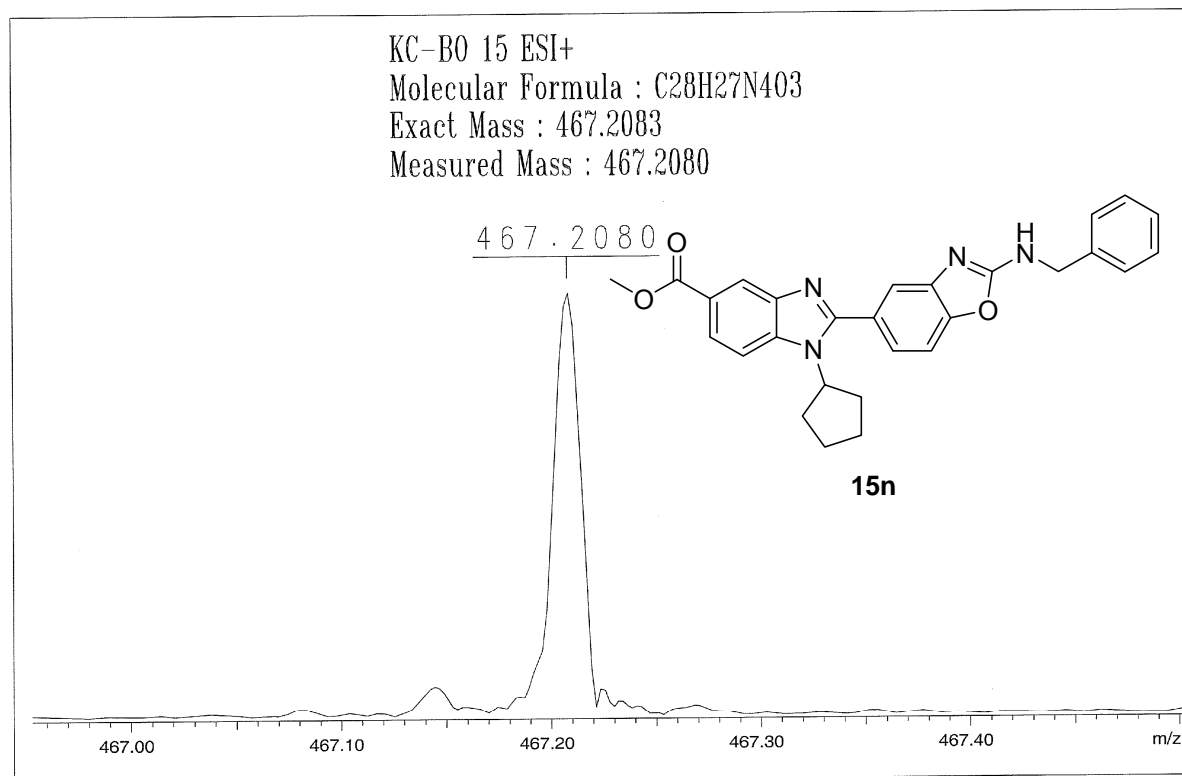

/d=/Data/yy/KCBO15/1/pdata/1 Administrator Fri Aug 8 11:38:31 2008

### HR Mass Spectra of Compound 15n

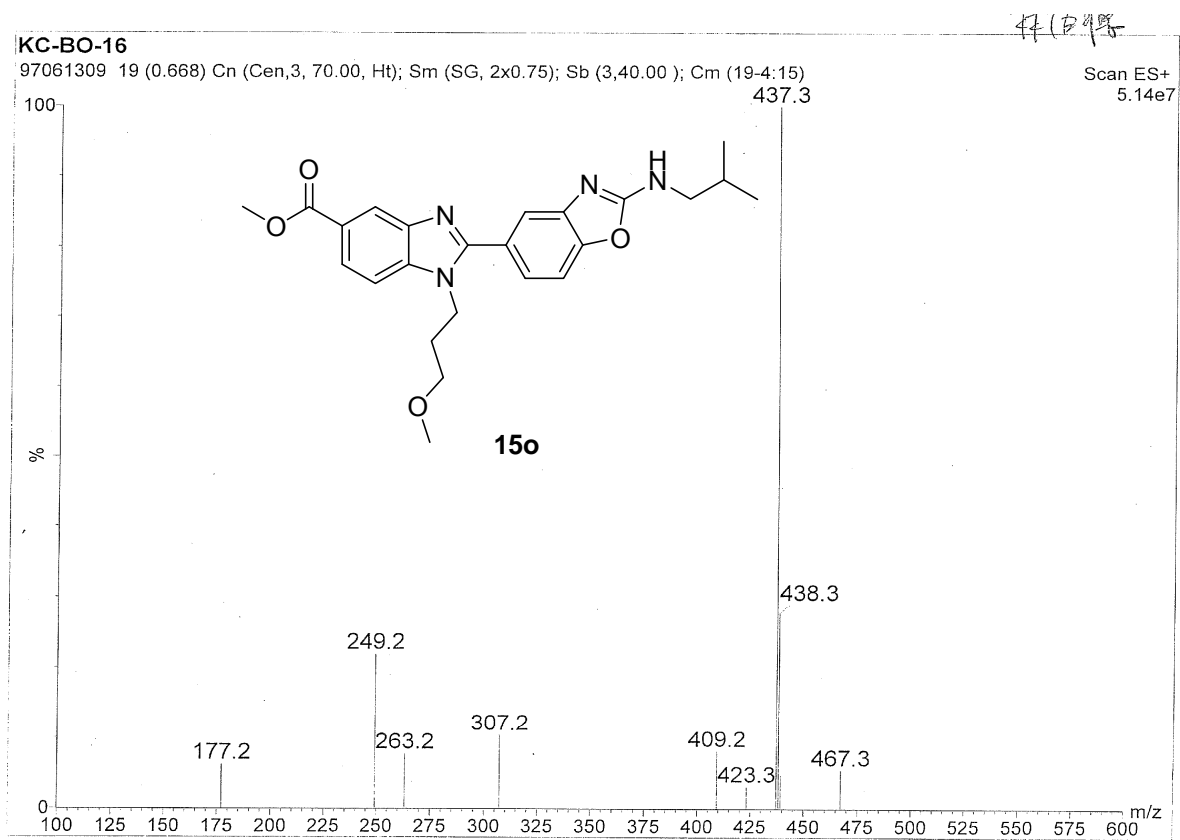

**LR Mass Spectra of Compound 15o**

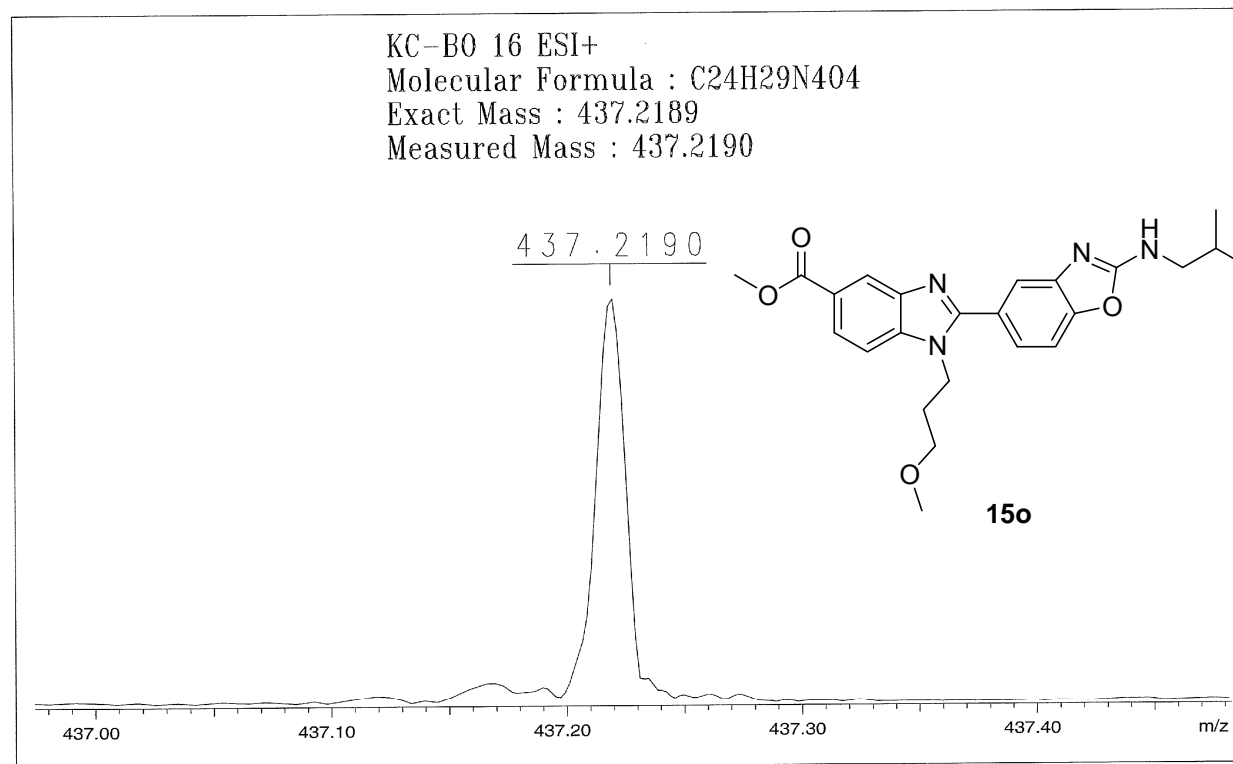

/d=/Data/yy/KCBO16/1/pdata/1 Administrator Fri Aug 8 11:59:16 2008

### HR Mass Spectra of Compound 15o

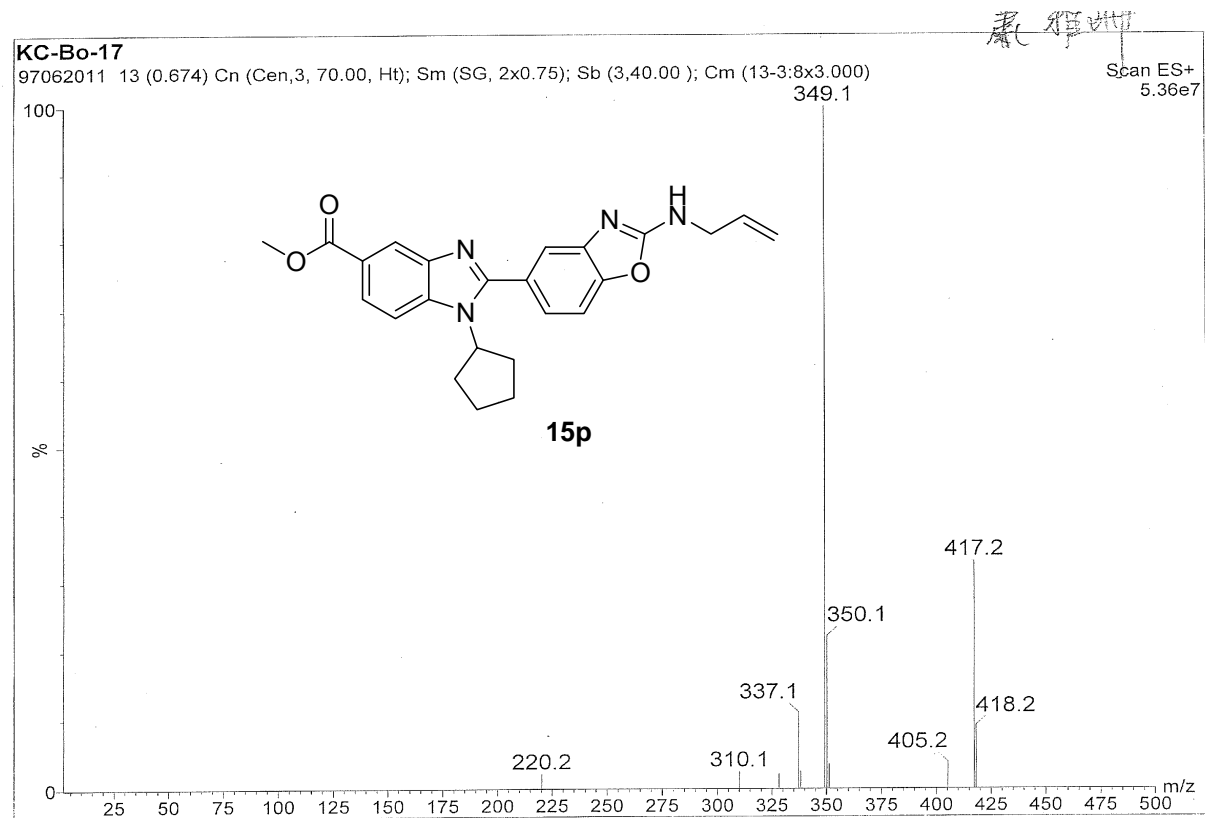

LR Mass Spectra of Compound 15p

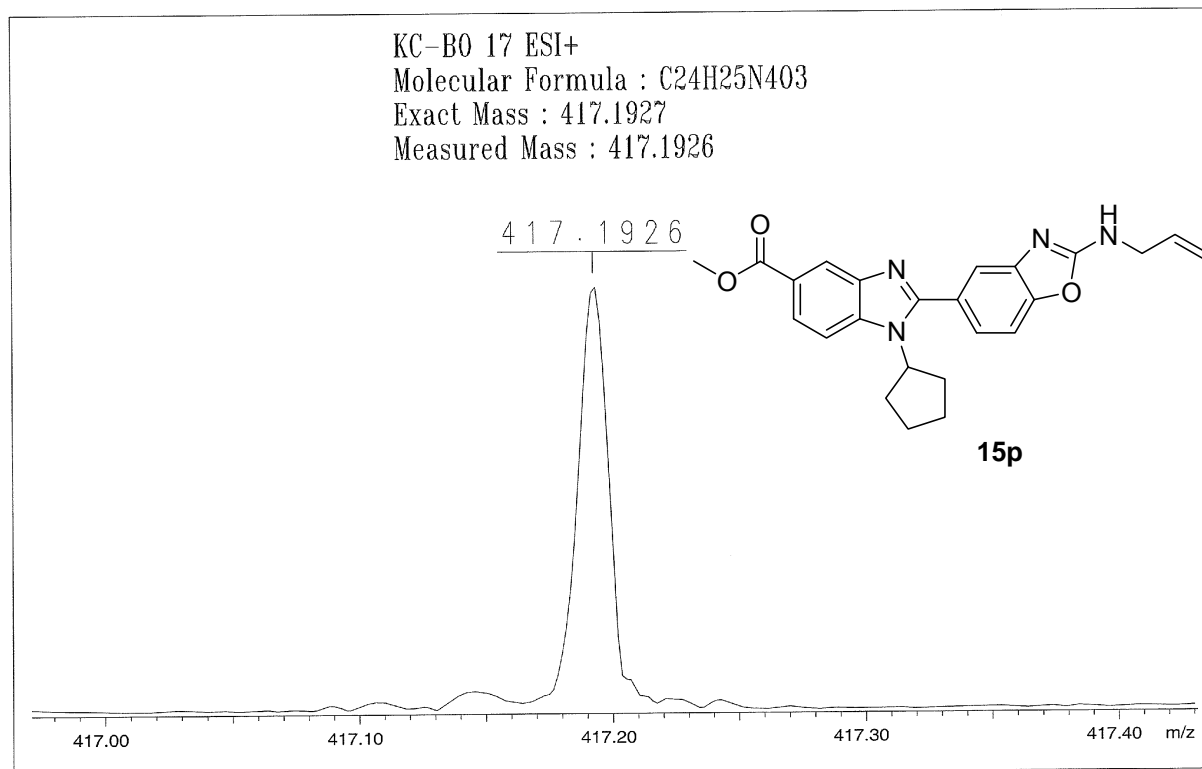

/d=/Data/yl/KCBO17/1/pdata/1 Administrator Fri Aug 8 12:07:11 2008

### HR Mass Spectra of Compound 15p

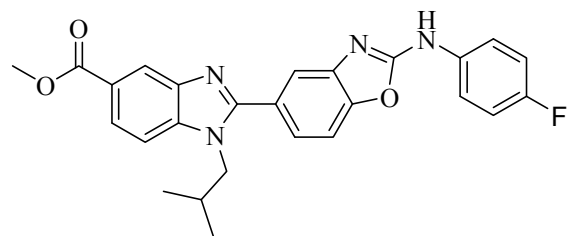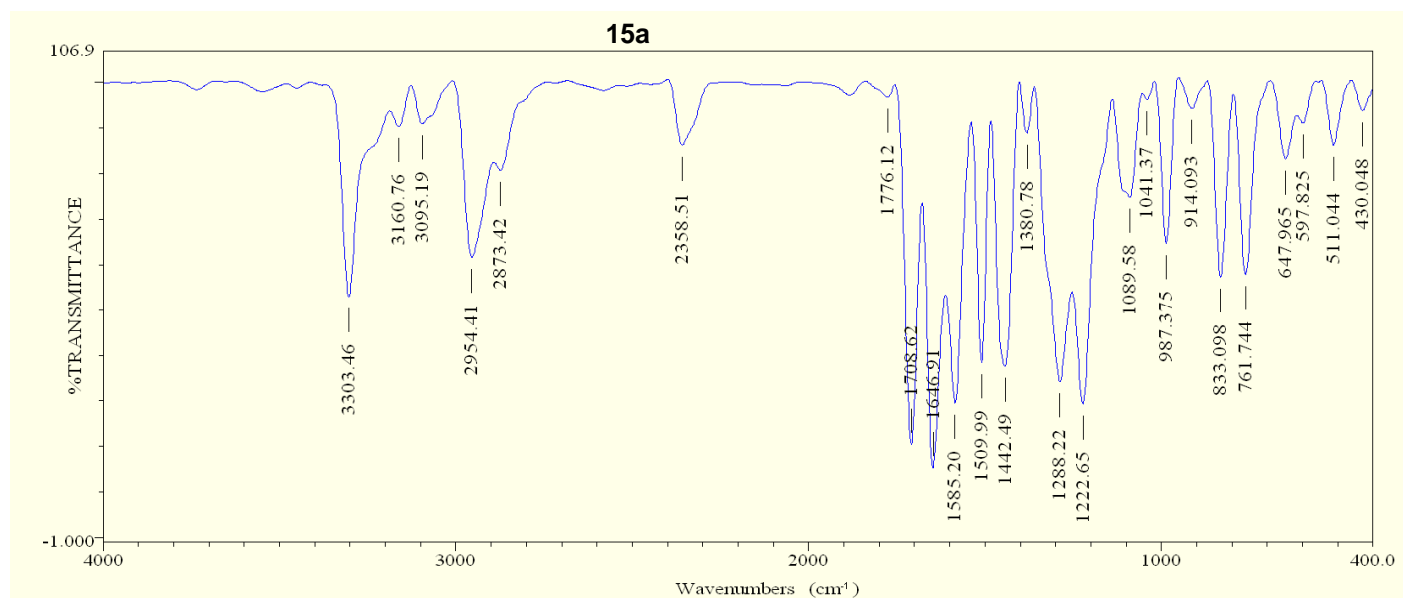

**IR Spectra of Compound 15a**

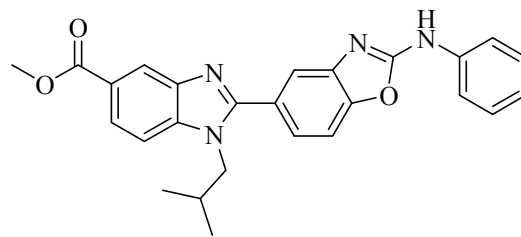

**15b**

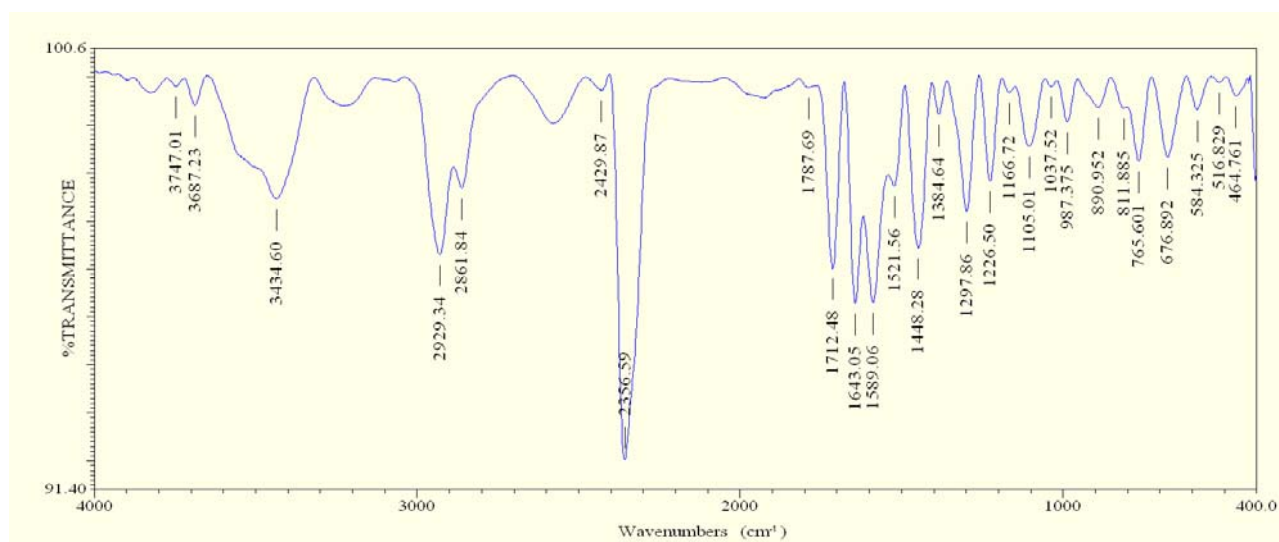

**IR Spectra of Compound 15b**



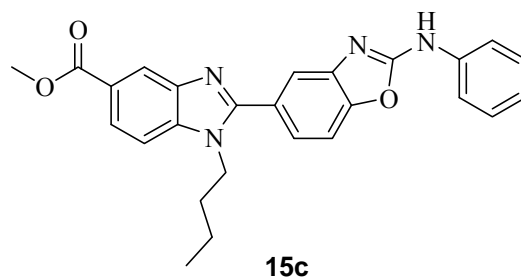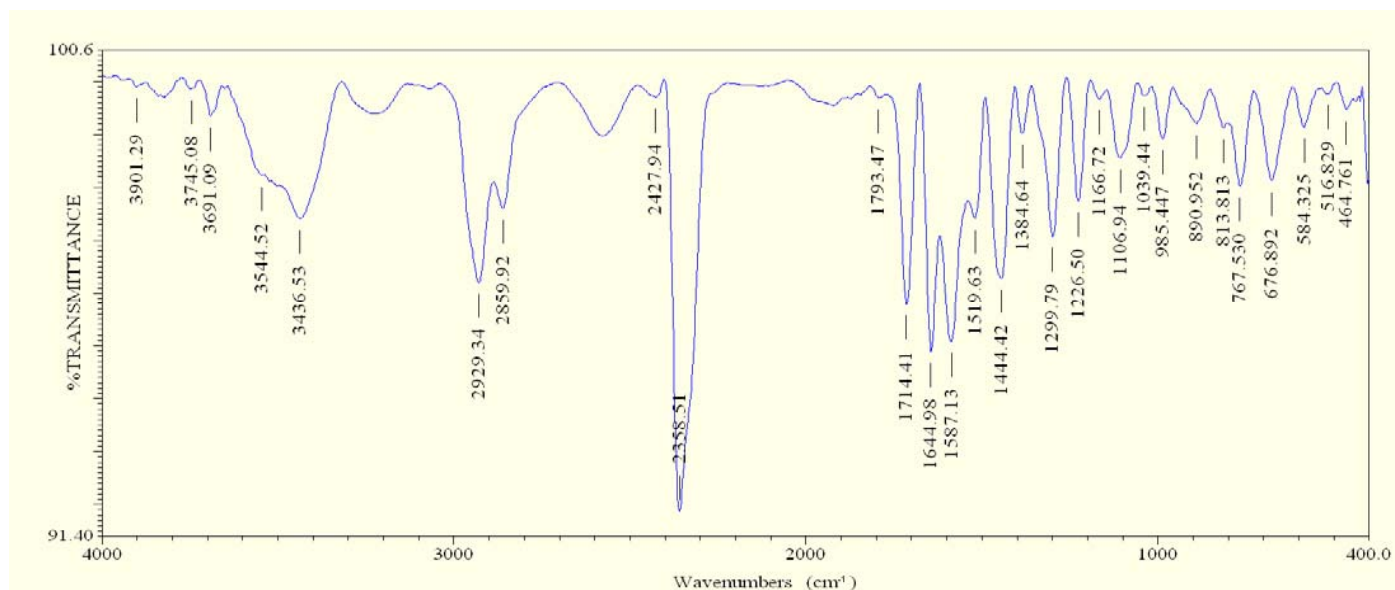

IR Spectra of Compound 15c

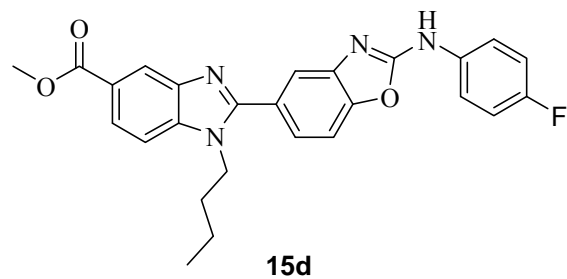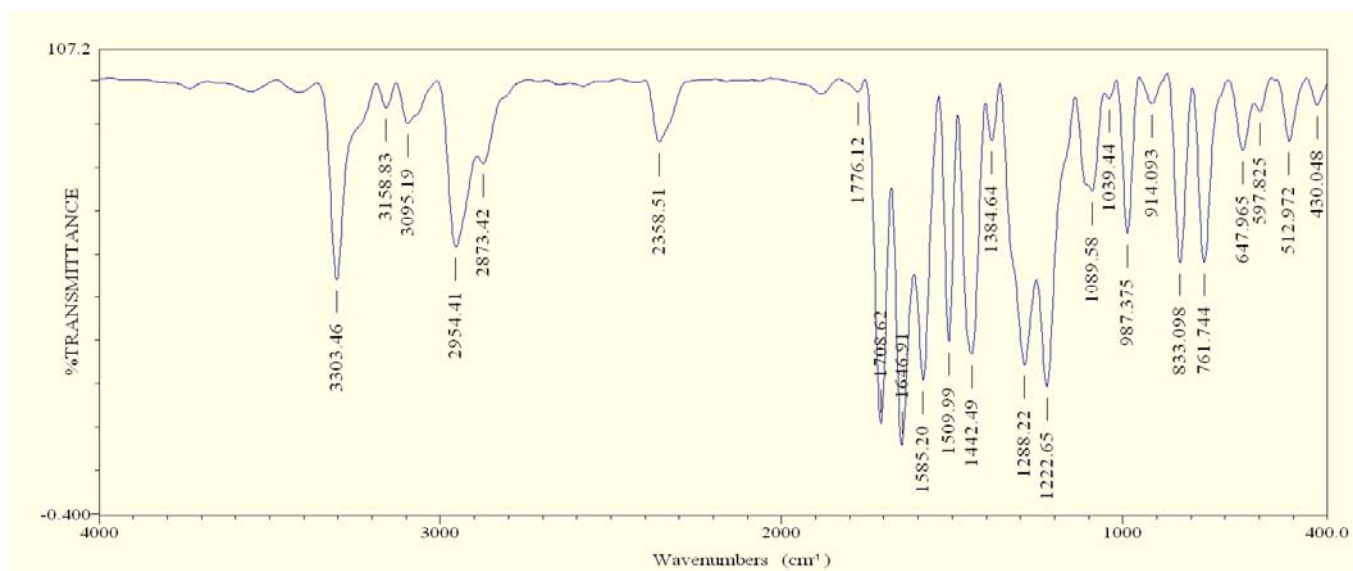

IR Spectra of Compound 15d

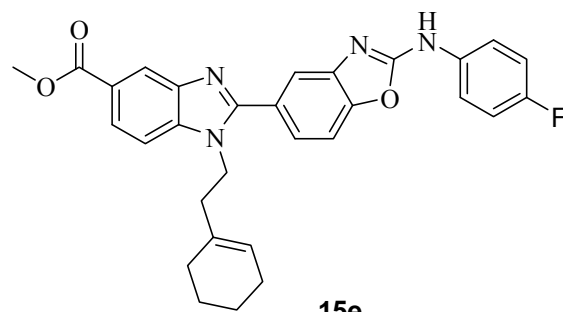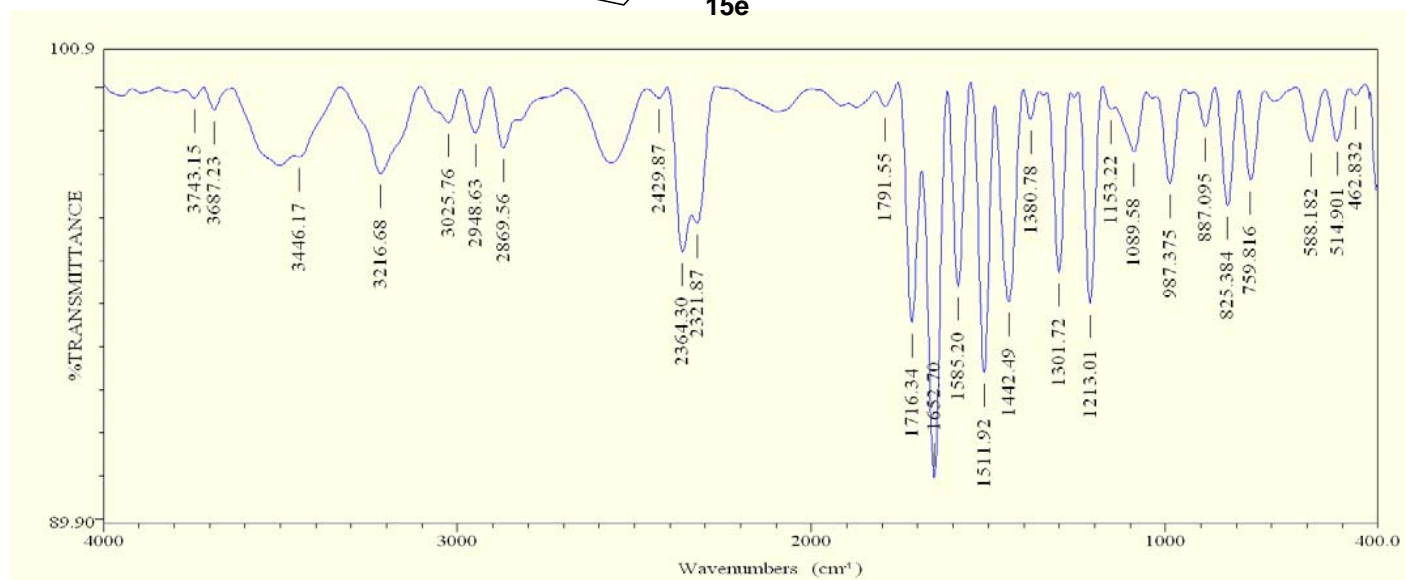

**IR Spectra of Compound 15e**

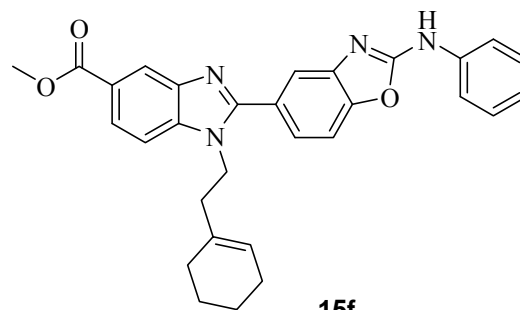

15f

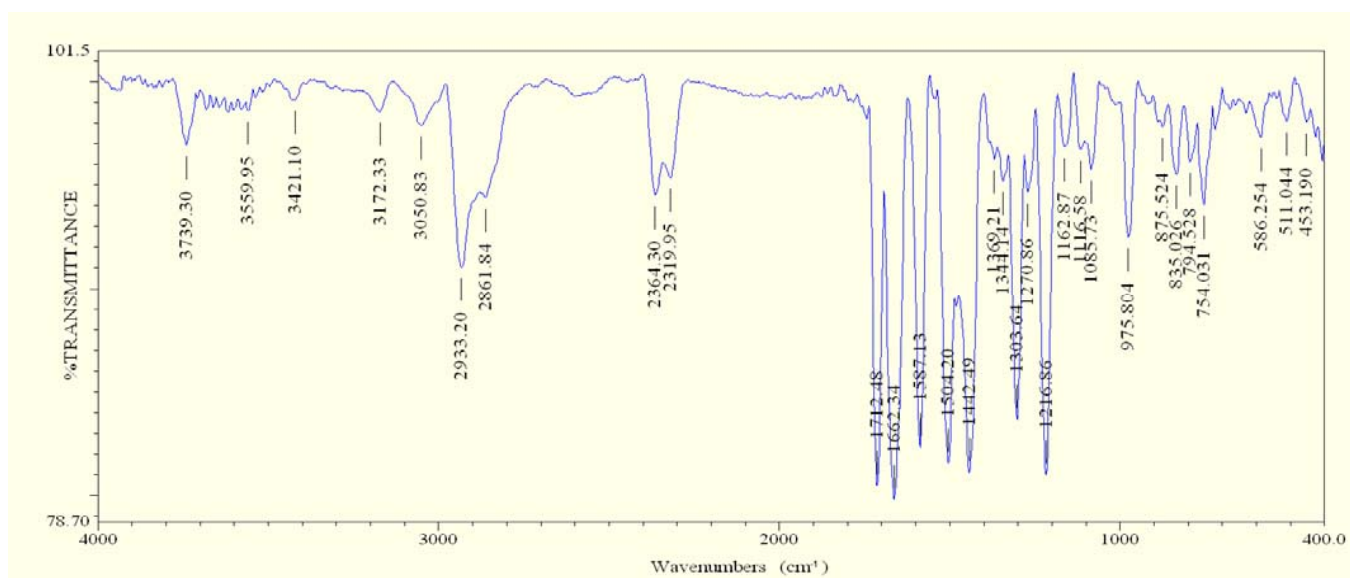

IR Spectra of Compound 15f

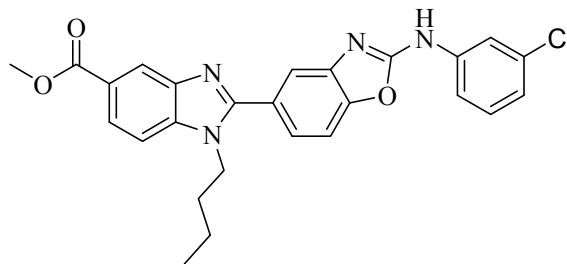

**15g**

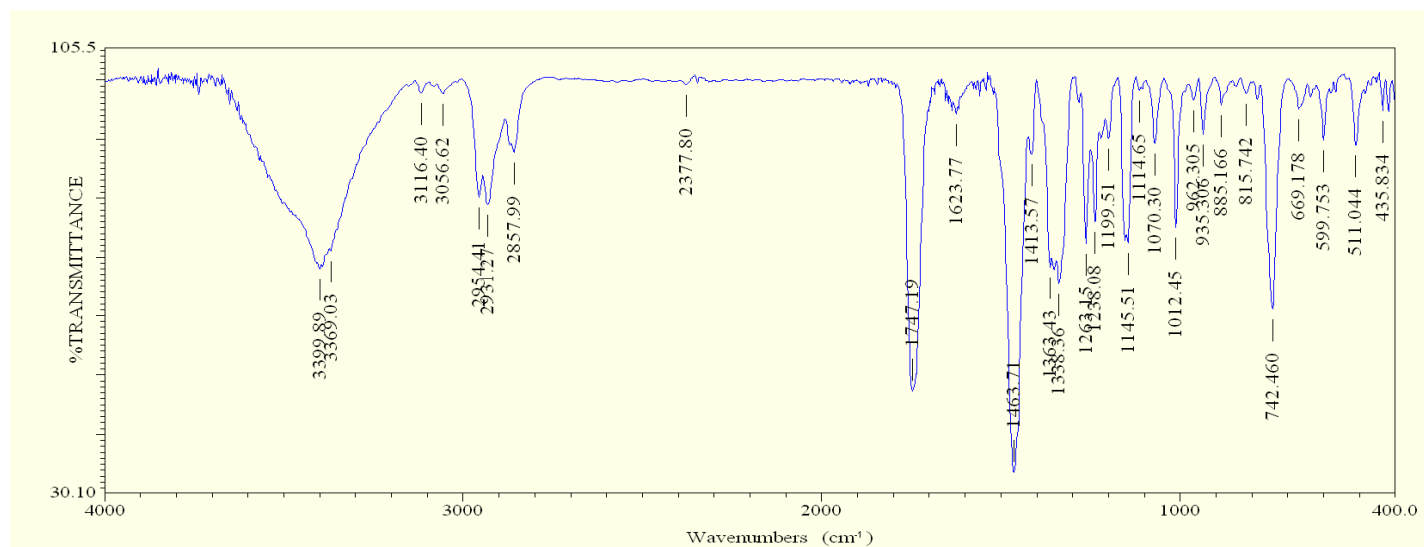

**IR Spectra of Compound 15g**

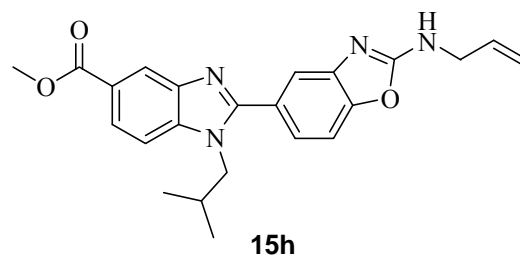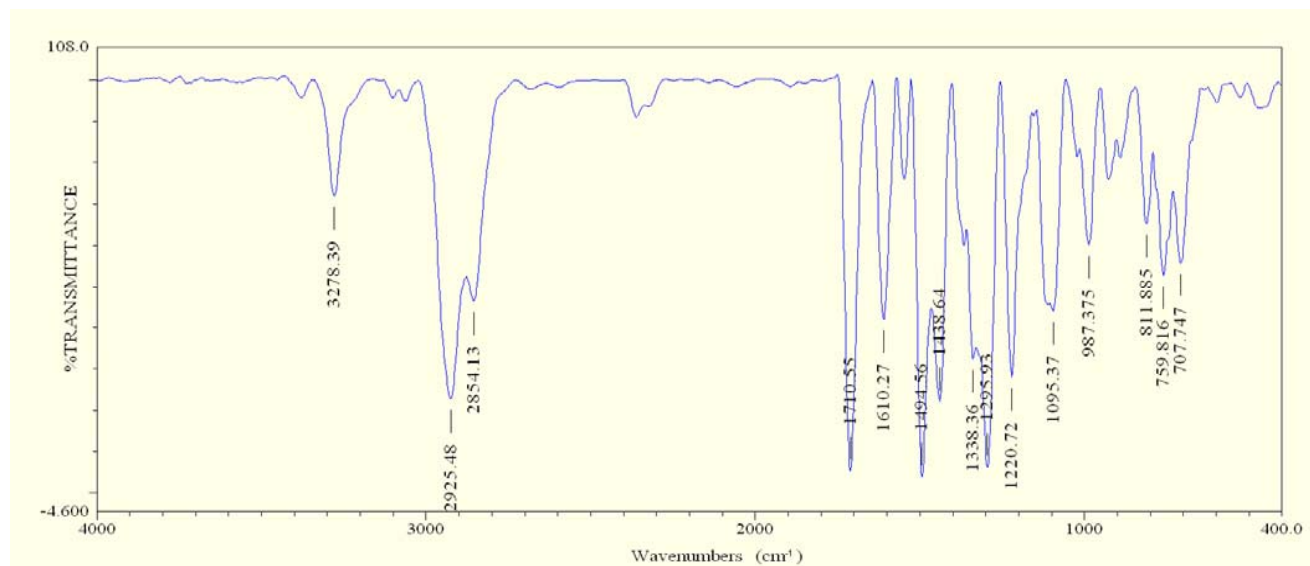

**IR Spectra of Compound 15h**

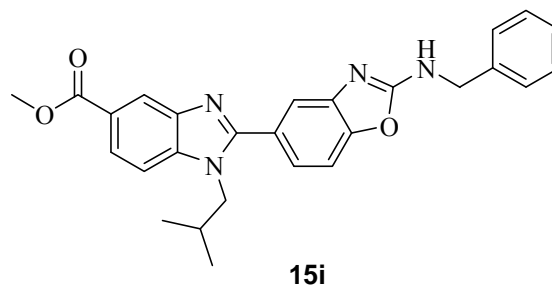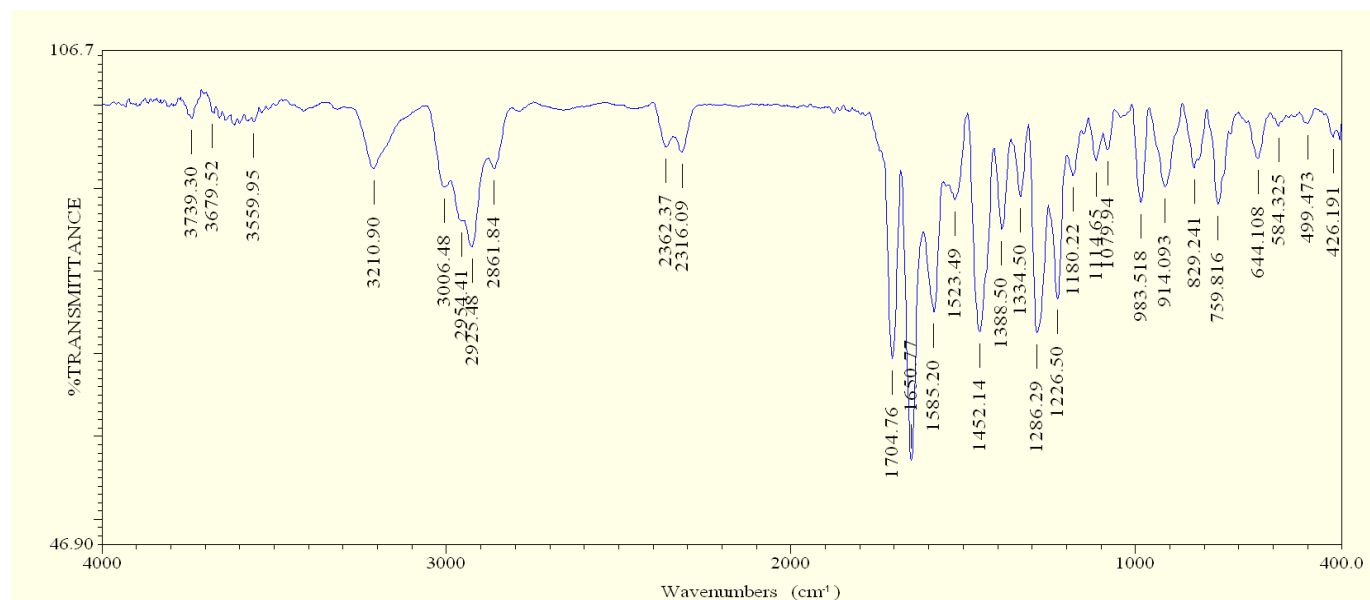

**IR Spectra of Compound 15i**

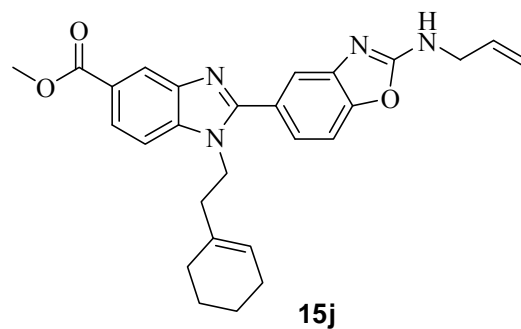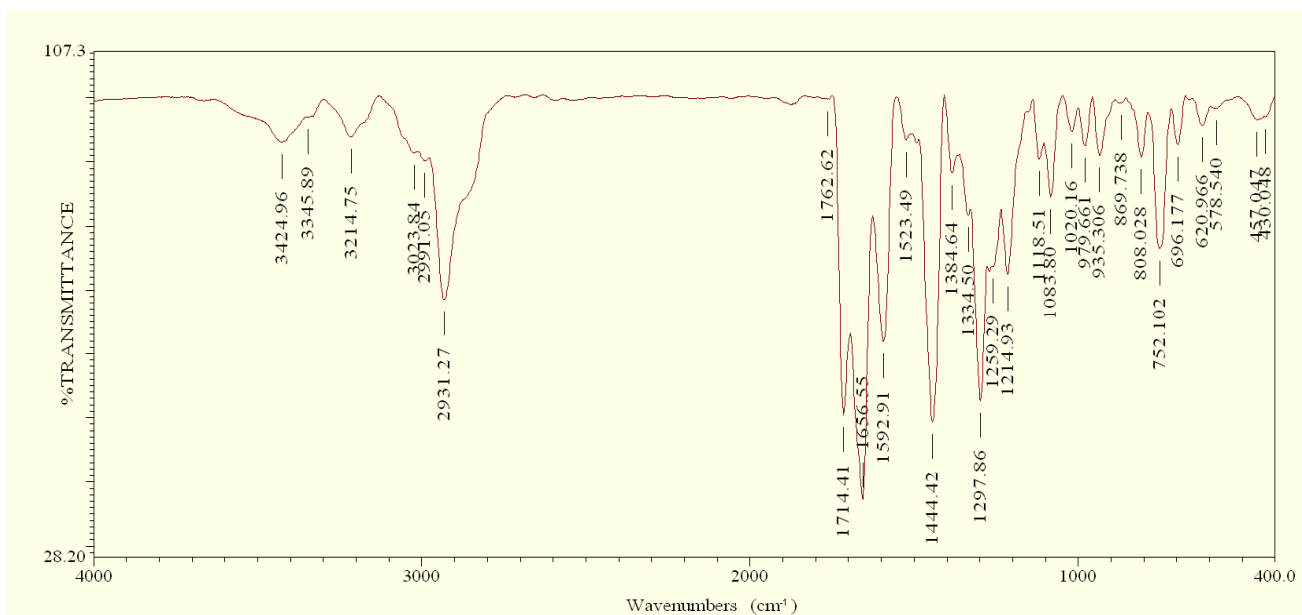

**IR Spectra of Compound 15j**



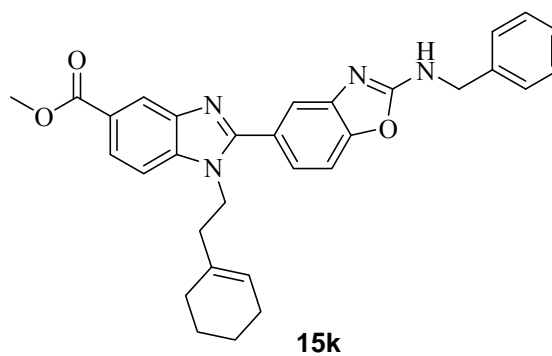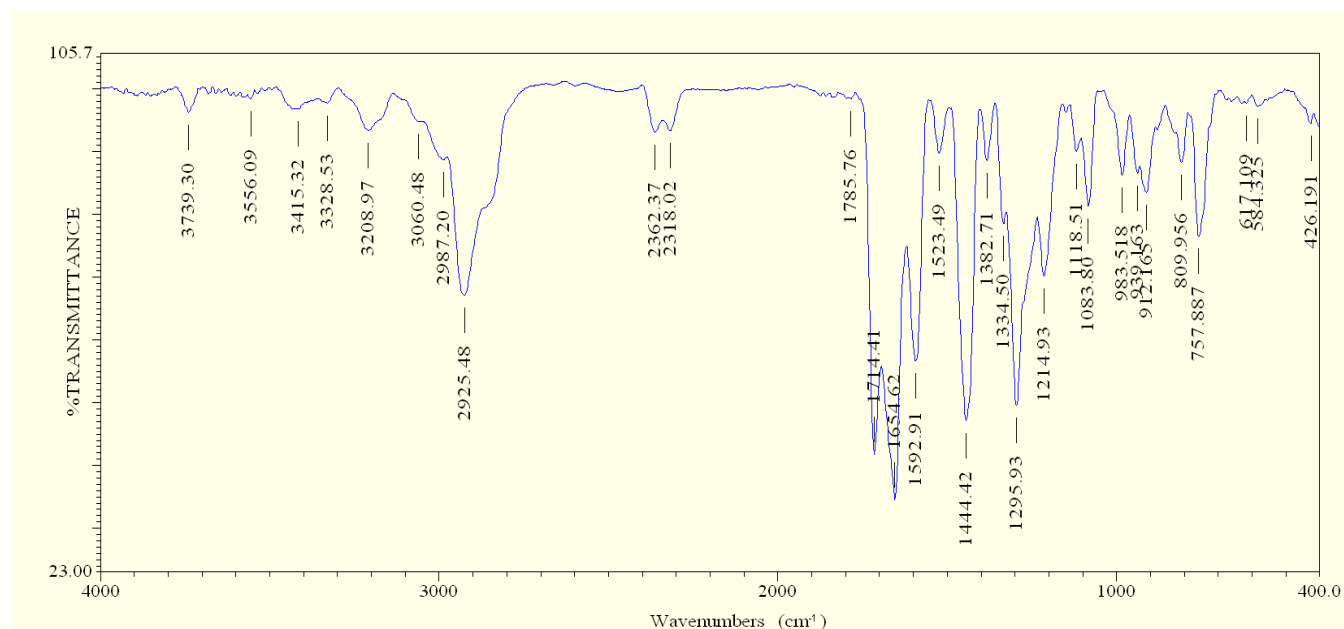

**IR Spectra of Compound 15k**

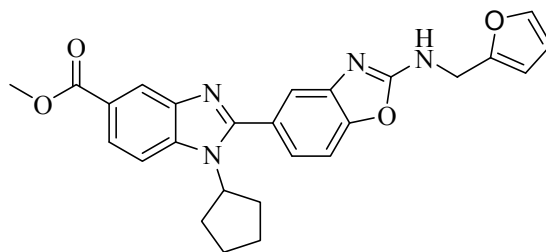

**15l**

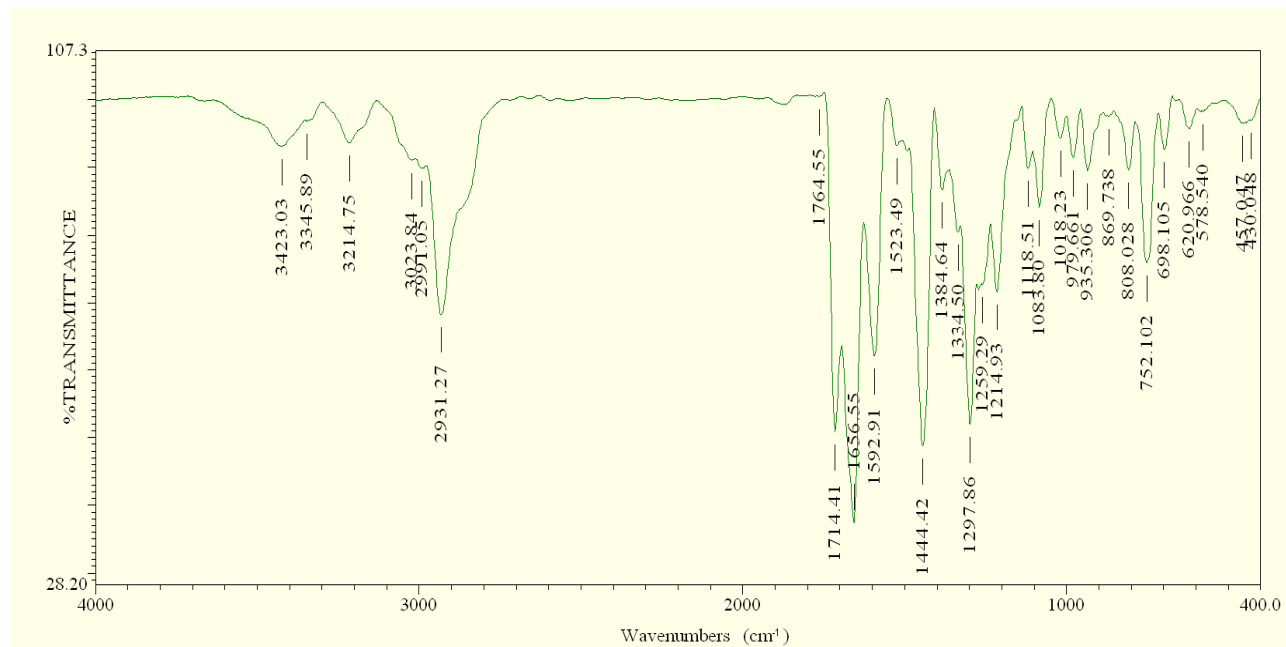

**IR Spectra of Compound 15l**

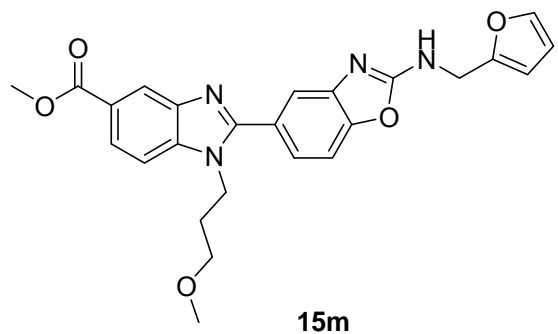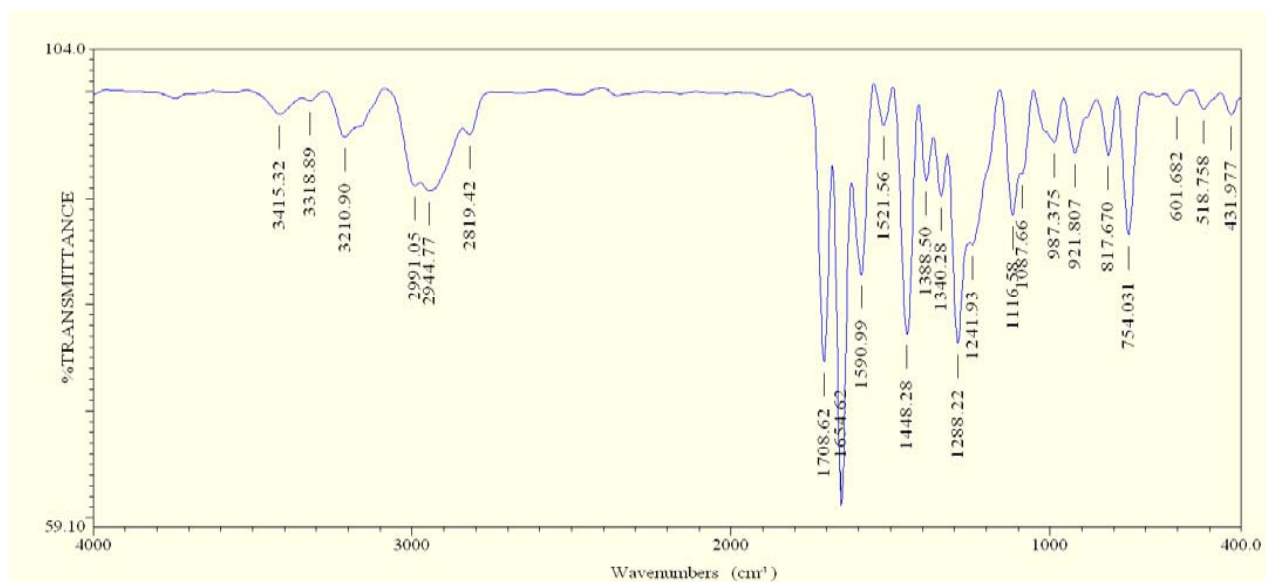

**IR Spectra of Compound 15m**

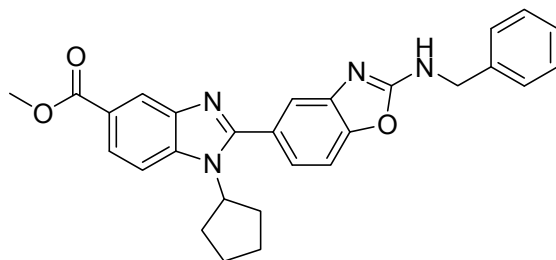

**15n**

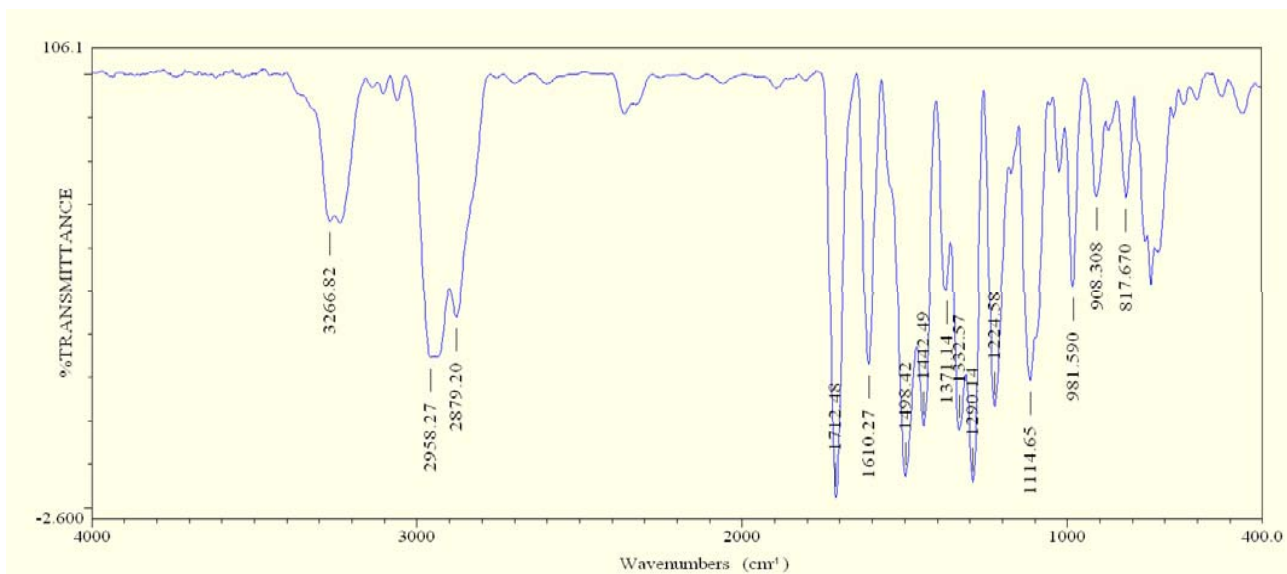

**IR Spectra of Compound 15n**

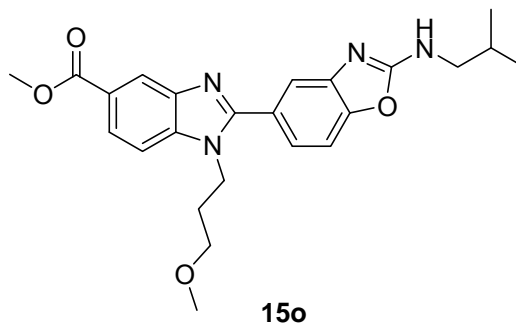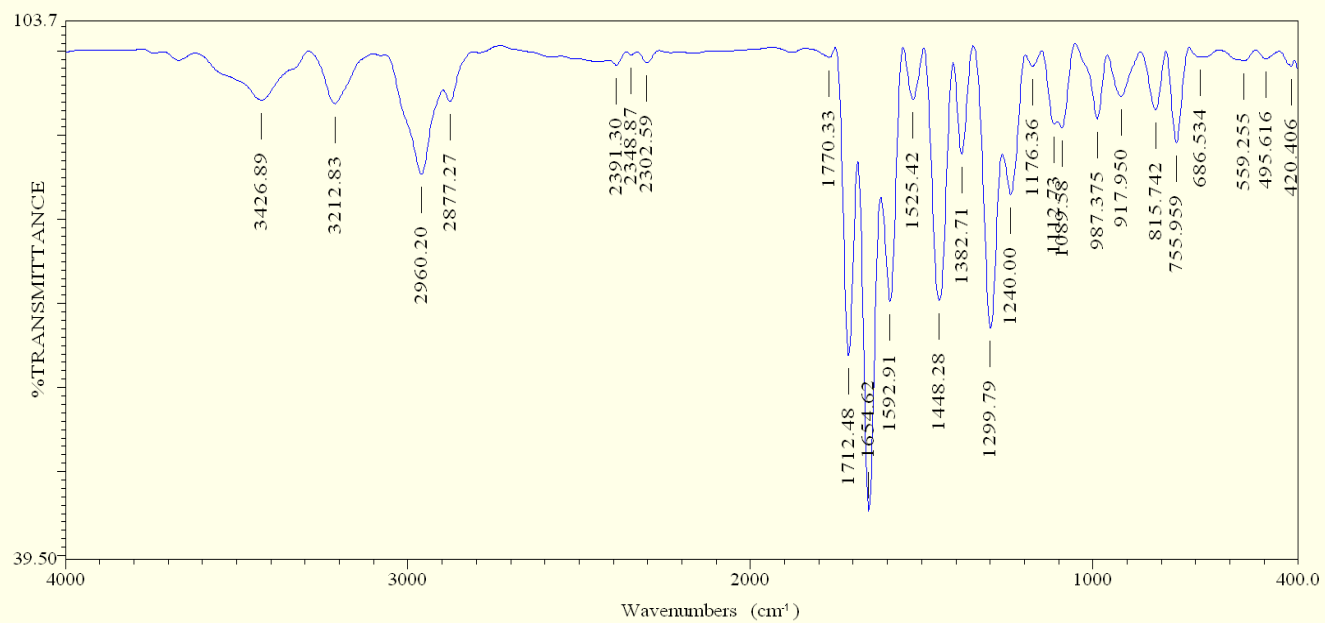

**IR Spectra of Compound 15o**

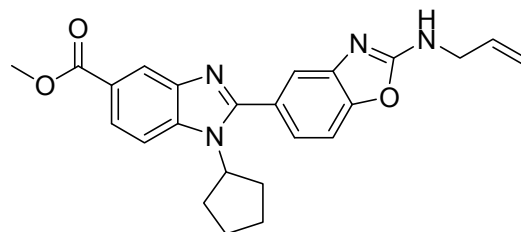

**15p**

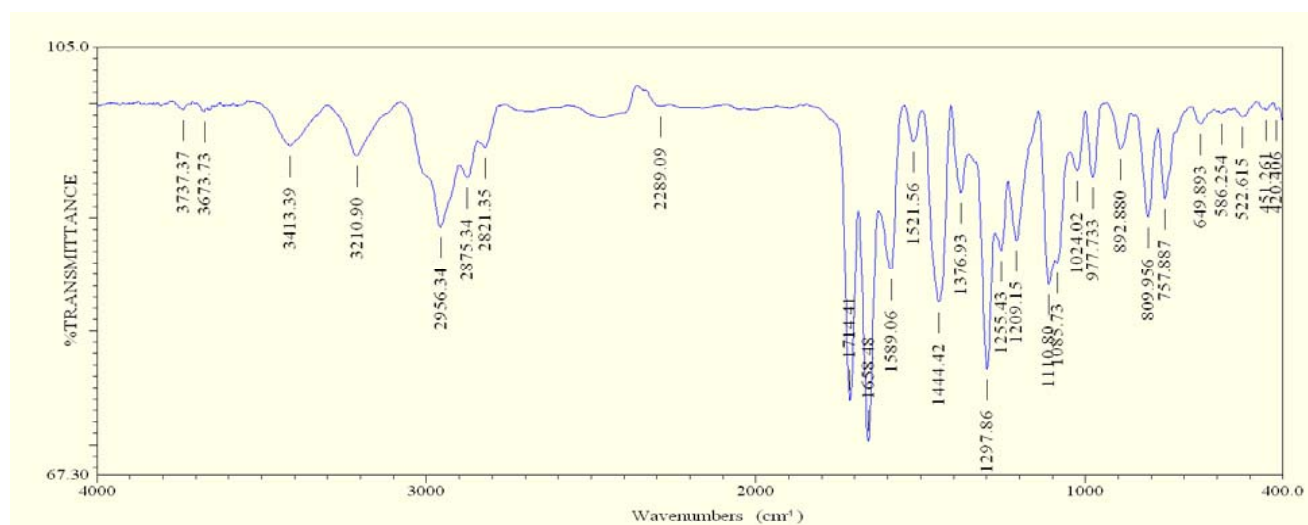

**IR Spectra of Compound 15p**

Methyl 2-(3-(3-allylthioureido)-4-hydroxyphenyl)-1-isobutyl-1H-benzo[d]imidazole-5-carboxylate (**a**):

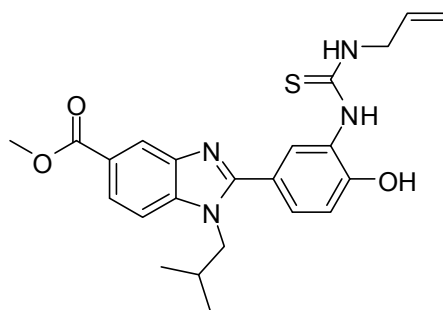

**a**

$^1\text{H}$  NMR (300 MHz,  $\text{CDCl}_3$ )  $\delta$  8.53 (d,  $J = 1.3$  Hz, 1H), 8.04 (dd,  $J = 8.5, 1.3$  Hz, 1H), 7.68 (s, 1H), 7.46-7.40 (m, 3H), 6.03 (m, 1H), 5.59 (brs, OH), 5.36 (dd,  $J = 17.2, 1.2$  Hz, 1H), 5.26 (dd,  $J = 10.3, 1.2$  Hz, 1H), 4.29-4.04 (m, 4H), 3.93 (s, 3H), 2.10(sept,  $J = 6.6$  Hz, 1H), 0.72 (d,  $J = 6.6$  Hz, 6H);  $^{13}\text{C}$  NMR (75 MHz,  $\text{CDCl}_3$ ):  $\delta$  168.1, 163.1, 156.5, 149.9, 143.7, 142.9, 139.4, 133.8, 126.7, 124.6, 124.5, 123.4, 123.2, 122.6, 117.8, 110.5, 109.6, 52.5, 52.4, 45.0, 29.1, 20.5; MS (ESI)  $m/z$ : 438 ( $\text{M}^+$ ), 439 ( $\text{M}+\text{H}$ );

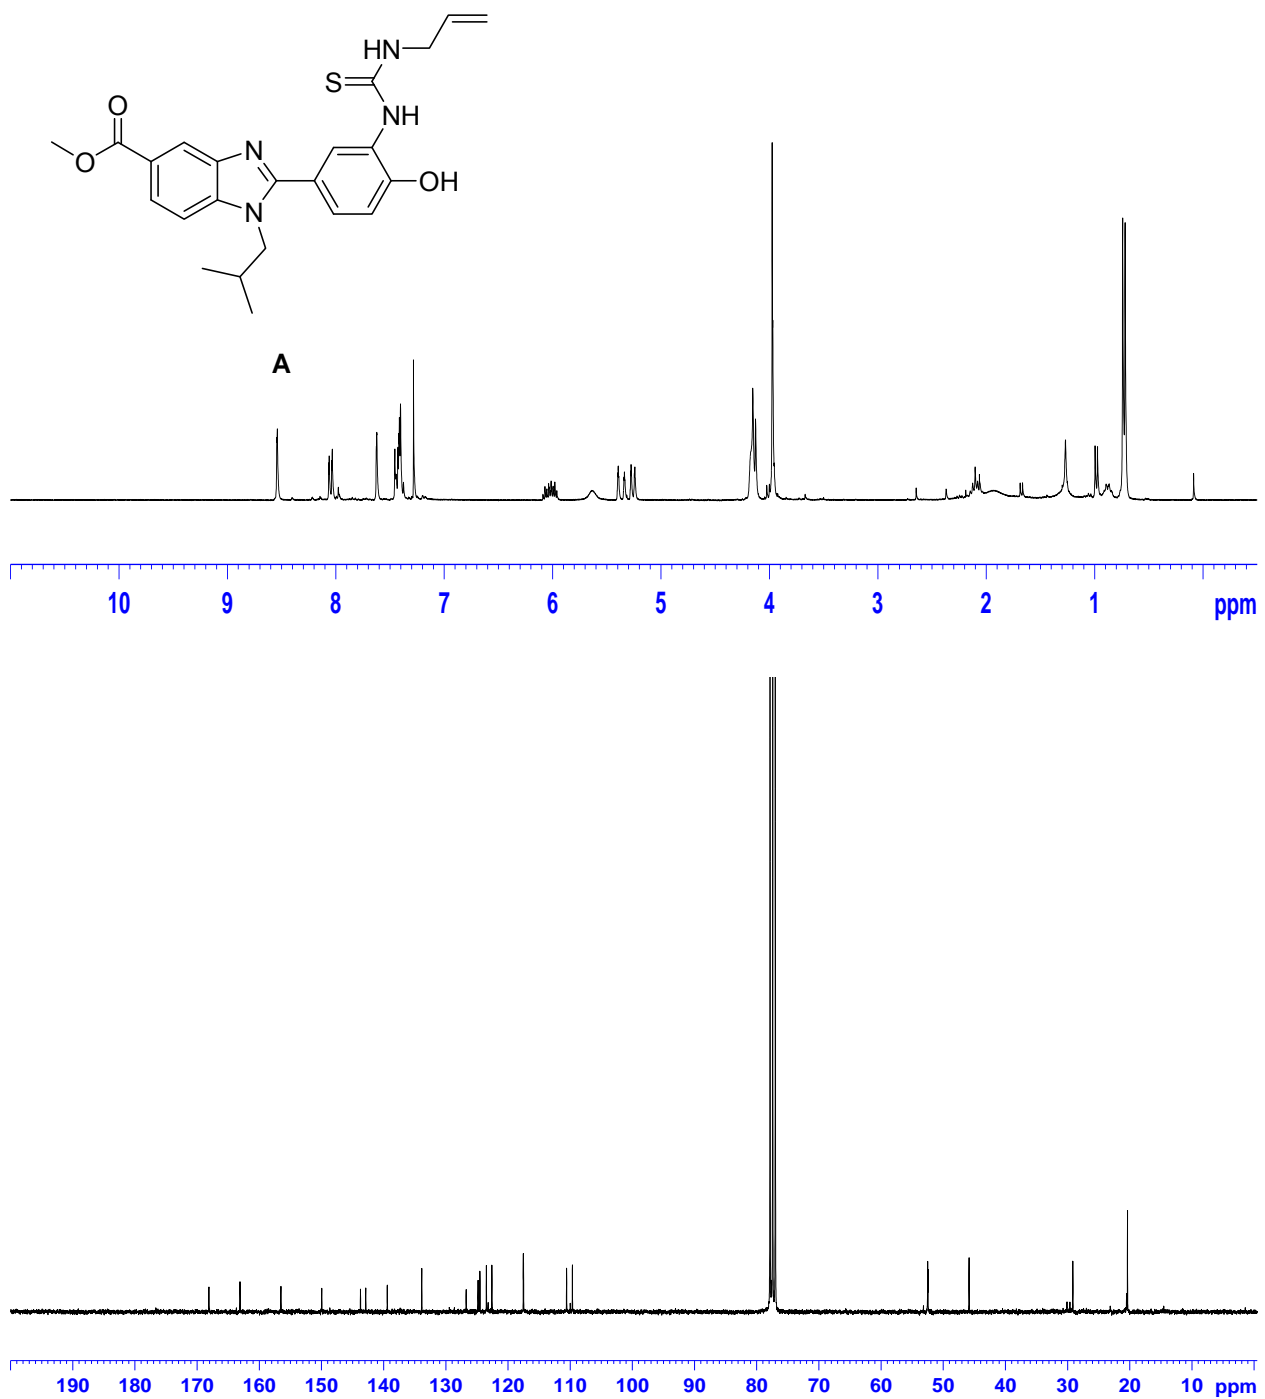

**$^1\text{H}$  and  $^{13}\text{C}$  Spectra of Intermediate 'a'**



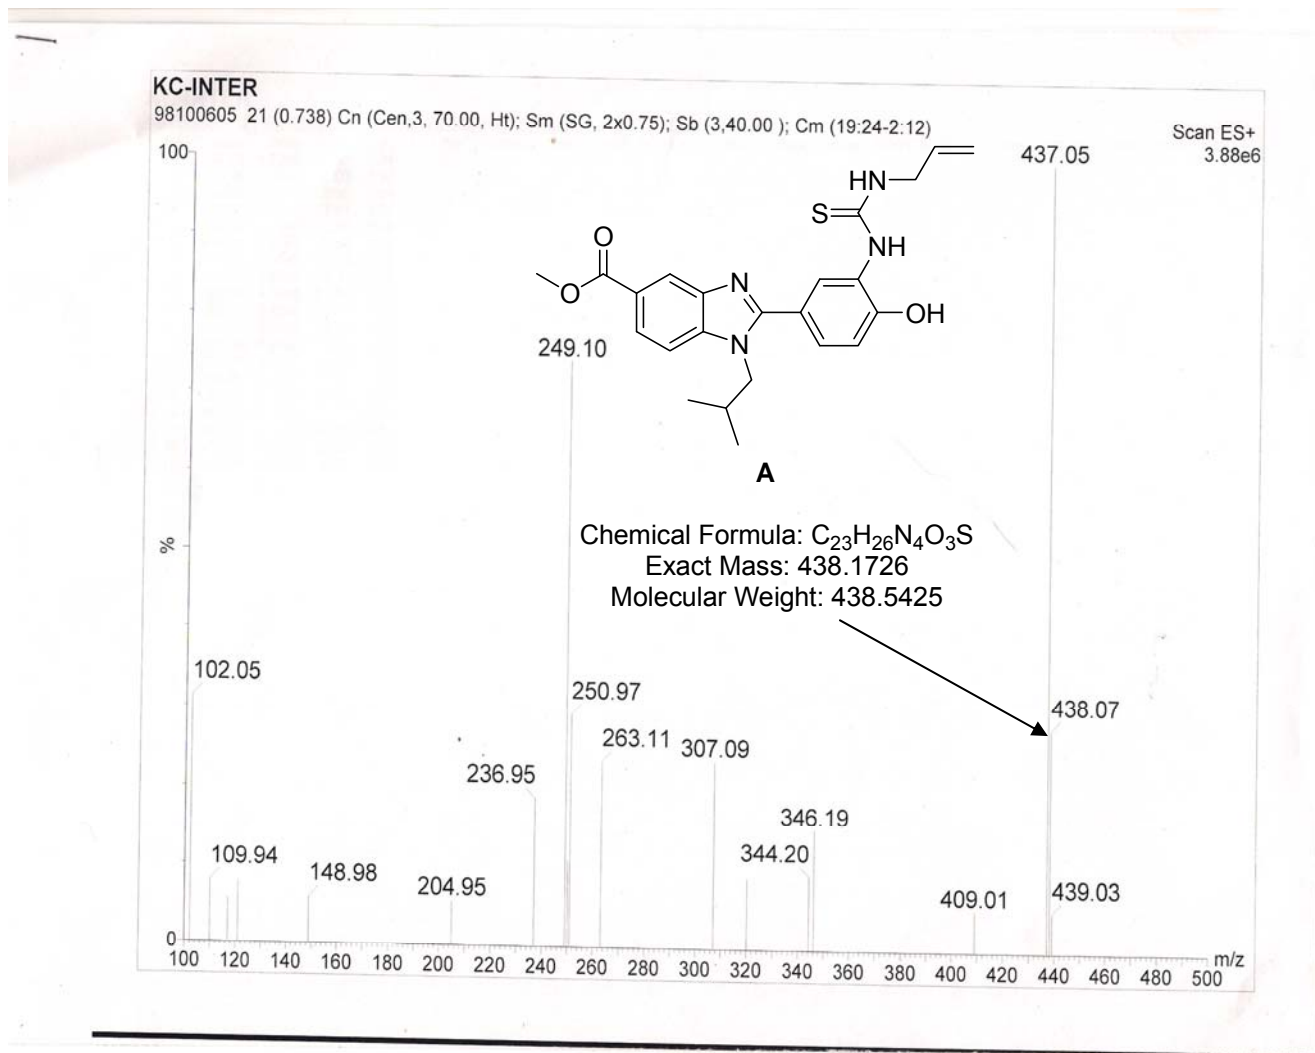

### LR Mass Spectral Data of Intermediate 'a'

## Elemental Analysis of Compound 15n

| 中興大學研發處貴重儀器使用中心                                                                                                                                                                                   |                    |                    |                       |       |       |
|---------------------------------------------------------------------------------------------------------------------------------------------------------------------------------------------------|--------------------|--------------------|-----------------------|-------|-------|
| 元素分析儀 Elementar vario EL III CHN-OS Rapid 服務報告書 NO. 1                                                                                                                                             |                    |                    |                       |       |       |
| NAME: <u>Barnab</u>                                                                                                                                                                               |                    |                    |                       |       |       |
| 使用者姓名:                                                                                                                                                                                            | <u>馬娜莉</u>         | 中心編號:              | _____                 |       |       |
| 服務單位:                                                                                                                                                                                             | <u>交大應化所</u>       | 名稱或代號:             | <u>Kr-B0-15 [15n]</u> |       |       |
| 主管姓名:                                                                                                                                                                                             | <u>孫仲銘</u>         |                    |                       |       |       |
| 收件日期:                                                                                                                                                                                             | <u>99年11月4日</u>    | 完成日期:              | <u>99年11月4日</u>       |       |       |
| 分析結果:                                                                                                                                                                                             |                    |                    |                       |       |       |
| 樣品重量:                                                                                                                                                                                             | 1) <u>3.566 mg</u> | 2) <u>3.516 mg</u> | 3) _____              | mg    |       |
| <i>Weight</i>                                                                                                                                                                                     | N %                | C %                | H %                   | S %   | O %   |
| 實驗值:                                                                                                                                                                                              | 1) <u>11.81</u>    | <u>72.05</u>       | <u>5.68</u>           | _____ | _____ |
| <i>experimental value</i>                                                                                                                                                                         | 2) <u>11.81</u>    | <u>72.00</u>       | <u>5.77</u>           | _____ | _____ |
|                                                                                                                                                                                                   | 3) _____           | _____              | _____                 | _____ | _____ |
| 推測值:                                                                                                                                                                                              | <u>12.01</u>       | <u>72.09</u>       | <u>5.62</u>           | _____ | _____ |
| <i>Calculated Value</i>                                                                                                                                                                           |                    |                    |                       |       |       |
| 本日所用之 Standard:                                                                                                                                                                                   |                    |                    |                       |       |       |
| ★ <input type="checkbox"/> Acetanilid <input type="checkbox"/> 4-Nitroaniline <input type="checkbox"/> Benzoic acid                                                                               |                    |                    |                       |       |       |
| <input type="checkbox"/> Sulfanilic acid <input type="checkbox"/> 1-Chloro-2,4-dinitrobenzene                                                                                                     |                    |                    |                       |       |       |
|                                                                                                                                                                                                   | N %                | C %                | H %                   | S %   | O %   |
| 理論值:                                                                                                                                                                                              | <u>10.36</u>       | <u>71.09</u>       | <u>6.71</u>           | _____ | _____ |
| 測出值:                                                                                                                                                                                              | <u>10.29</u>       | <u>71.07</u>       | <u>6.63</u>           | _____ | _____ |
| 建議:                                                                                                                                                                                               |                    |                    |                       |       |       |
| 費用核算: C H N: <u>1000</u>                                                                                                                                                                          |                    |                    |                       |       |       |
| O: _____                                                                                                                                                                                          |                    |                    |                       |       |       |
| S: _____    合計台幣: <u>1000</u>                                                                                                                                                                     |                    |                    |                       |       |       |
| 儀器負責人簽章: 鄭政峯  技術員簽章: 陳宜絹  |                    |                    |                       |       |       |
| 報告日期: 99年11月5日                                                                                                                                                                                    |                    |                    |                       |       |       |

## 中興大學研發處貴重儀器使用中心

元素分析儀 Elementar vario EL III CHN-OS Rapid 服務報告書 NO. 1

|                           |                    |                          |                             |                                     |              |
|---------------------------|--------------------|--------------------------|-----------------------------|-------------------------------------|--------------|
| Name: <i>Bornali</i>      |                    |                          |                             |                                     |              |
| 使用者姓名:                    | <u>馬娜莉</u>         | 中心編號:                    | _____                       |                                     |              |
| 服務單位:                     | <u>交大應化所</u>       | 名稱或代號:                   | <u>Kr-B0-15 [15H]</u>       |                                     |              |
| 主管姓名:                     | <u>孫仲銘</u>         |                          |                             |                                     |              |
| 收件日期:                     | <u>99年11月4日</u>    | 完成日期:                    | <u>99年</u>                  | <u>11月</u>                          | <u>5日</u>    |
| 分析結果:                     |                    |                          |                             |                                     |              |
| 樣品重量:                     | 1) <u>2.115 mg</u> | 2) <u>2.105 mg</u>       | 3) _____                    | mg                                  |              |
| <i>Weight</i>             | N %                | C %                      | H %                         | S %                                 | O %          |
| 實驗值:                      | 1) _____           | _____                    | _____                       | _____                               | <u>10.45</u> |
| <i>experimental value</i> | 2) _____           | _____                    | _____                       | _____                               | <u>10.41</u> |
|                           | 3) _____           | _____                    | _____                       | _____                               | _____        |
| 推測值:                      | _____              | _____                    | _____                       | _____                               | <u>10.29</u> |
| <i>Calculated value</i>   |                    |                          |                             |                                     |              |
| 本日所用之 Standard:           |                    |                          |                             |                                     |              |
| <input type="checkbox"/>  | Acetanilid         | <input type="checkbox"/> | 4-Nitroaniline              | <input checked="" type="checkbox"/> | Benzoic acid |
| <input type="checkbox"/>  | Sulfanilic acid    | <input type="checkbox"/> | 1-Chloro-2,4-dinitrobenzene |                                     |              |
|                           | N %                | C %                      | H %                         | S %                                 | O %          |
| 理論值:                      | _____              | _____                    | _____                       | _____                               | <u>26.20</u> |
| 測出值:                      | _____              | _____                    | _____                       | _____                               | <u>26.14</u> |
| 建議:                       |                    |                          |                             |                                     |              |
| 費用核算: C H N: _____        |                    |                          |                             |                                     |              |
|                           | O:                 | <u>1000</u>              | _____                       |                                     |              |
|                           | S:                 | _____                    | 合計台幣:                       | <u>1000</u>                         | _____        |

儀器負責人簽章: 鄭政峯  技術員簽章: 陳宜絹

 技術員  
陳宜絹

報告日期: 99年11月6日

## X ray crystallographic data of compound 15n

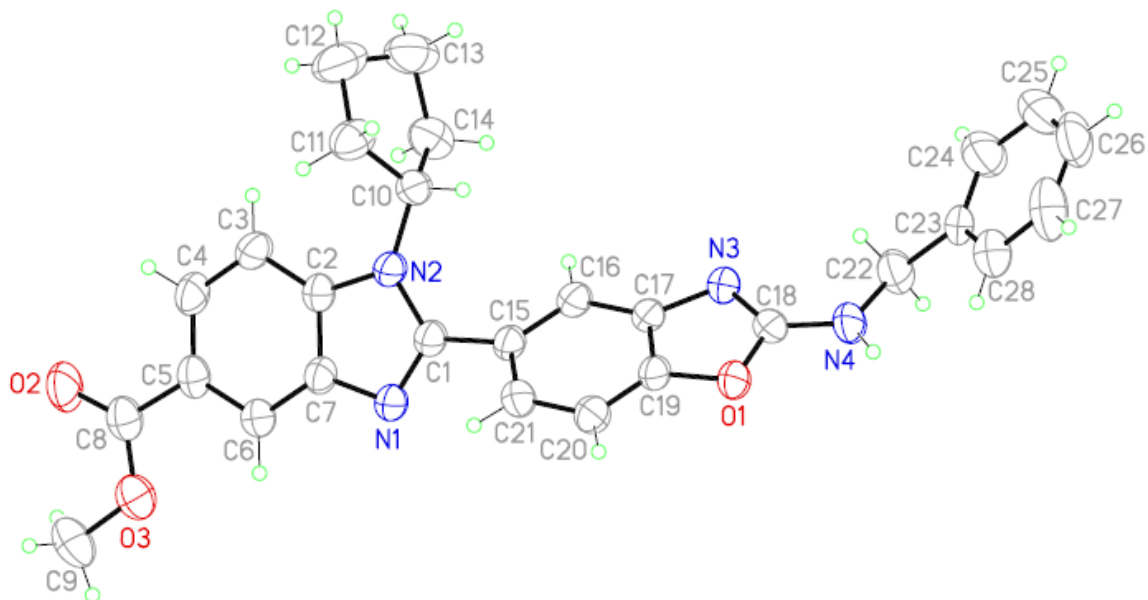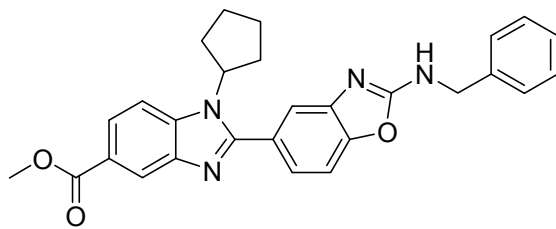

15n

## ORTEP diagram of Compound 15n

**Table 1.** Crystal data and structure refinement for 100220\_0m.

|                                   |                                                                                                                                        |
|-----------------------------------|----------------------------------------------------------------------------------------------------------------------------------------|
| Identification code               | 100220_0m                                                                                                                              |
| Empirical formula                 | C <sub>28</sub> H <sub>26</sub> N <sub>4</sub> O <sub>3</sub>                                                                          |
| Formula weight                    | 466.53                                                                                                                                 |
| Temperature                       | 296(2) K                                                                                                                               |
| Wavelength                        | 0.71073 Å                                                                                                                              |
| Crystal system                    | Monoclinic                                                                                                                             |
| Space group                       | P2(1)/c                                                                                                                                |
| Unit cell dimensions              | a = 11.2213(3) Å, $\alpha = 90^\circ$ .<br>b = 11.0837(2) Å, $\beta = 100.1810(10)^\circ$ .<br>c = 18.7917(5) Å, $\gamma = 90^\circ$ . |
| Volume                            | 2300.39(10) Å <sup>3</sup>                                                                                                             |
| Z                                 | 4                                                                                                                                      |
| Density (calculated)              | 1.347 Mg/m <sup>3</sup>                                                                                                                |
| Absorption coefficient            | 0.089 mm <sup>-1</sup>                                                                                                                 |
| F(000)                            | 984                                                                                                                                    |
| Crystal size                      | 0.30 x 0.10 x 0.10 mm <sup>3</sup>                                                                                                     |
| Theta range for data collection   | 2.14 to 26.38°.                                                                                                                        |
| Index ranges                      | -11 ≤ h ≤ 14, -13 ≤ k ≤ 13, -<br>23 ≤ l ≤ 22                                                                                           |
| Reflections collected             | 17349                                                                                                                                  |
| Independent reflections           | 4699 [R(int) = 0.0355]                                                                                                                 |
| Completeness to theta = 26.38°    | 99.8 %                                                                                                                                 |
| Absorption correction             | Empirical                                                                                                                              |
| Max. and min. transmission        | 0.7454 and 0.6978                                                                                                                      |
| Refinement method                 | Full-matrix least-squares on F <sup>2</sup>                                                                                            |
| Data / restraints / parameters    | 4699 / 12 / 336                                                                                                                        |
| Goodness-of-fit on F <sup>2</sup> | 1.032                                                                                                                                  |
| Final R indices [I > 2σ(I)]       | R1 = 0.0473, wR2 = 0.1126                                                                                                              |
| R indices (all data)              | R1 = 0.0844, wR2 = 0.1300                                                                                                              |
| Largest diff. peak and hole       | 0.268 and -0.299 e.Å <sup>-3</sup>                                                                                                     |

**Table 2.** Atomic coordinates ( $\times 10^4$ ) and equivalent isotropic displacement parameters ( $\text{\AA}^2 \times 10^3$ ) for 100220\_0m.  $U(\text{eq})$  is defined as one third of the trace of the orthogonalized  $U^{ij}$  tensor.

|        | x         | y         | z        | U(eq)  |
|--------|-----------|-----------|----------|--------|
| C(1)   | 3423(2)   | 3441(2)   | 479(1)   | 37(1)  |
| C(2)   | 2816(2)   | 5347(2)   | 440(1)   | 38(1)  |
| C(3)   | 2606(2)   | 6576(2)   | 522(1)   | 47(1)  |
| C(4)   | 1644(2)   | 7076(2)   | 67(1)    | 49(1)  |
| C(5)   | 895(2)    | 6397(2)   | -460(1)  | 43(1)  |
| C(6)   | 1107(2)   | 5175(2)   | -532(1)  | 44(1)  |
| C(7)   | 2070(2)   | 4654(2)   | -75(1)   | 38(1)  |
| C(8)   | -123(2)   | 7014(2)   | -929(1)  | 47(1)  |
| C(9)   | -1688(2)  | 6808(2)   | -1939(1) | 64(1)  |
| C(10)  | 4641(2)   | 4848(2)   | 1417(1)  | 42(1)  |
| C(11)  | 4190(2)   | 5479(2)   | 2048(1)  | 57(1)  |
| C(12)  | 4965(3)   | 6613(2)   | 2214(2)  | 79(1)  |
| C(13)  | 6076(3)   | 6382(2)   | 1901(2)  | 75(1)  |
| C(14)  | 5614(2)   | 5679(2)   | 1216(1)  | 59(1)  |
| C(15)  | 4107(2)   | 2317(2)   | 684(1)   | 37(1)  |
| C(16)  | 5363(2)   | 2254(2)   | 739(1)   | 39(1)  |
| C(17)  | 5905(2)   | 1123(2)   | 846(1)   | 37(1)  |
| C(18)  | 7063(2)   | -399(2)   | 926(1)   | 42(1)  |
| C(19)  | 5187(2)   | 113(2)    | 882(1)   | 38(1)  |
| C(20)  | 3961(2)   | 145(2)    | 848(1)   | 44(1)  |
| C(21)  | 3426(2)   | 1277(2)   | 748(1)   | 41(1)  |
| C(22)  | 9181(2)   | -827(2)   | 916(1)   | 52(1)  |
| C(23)  | 10128(16) | -1440(5)  | 1491(10) | 44(1)  |
| C(24)  | 11199(4)  | -864(4)   | 1724(3)  | 78(2)  |
| C(25)  | 12073(5)  | -1408(4)  | 2235(3)  | 104(2) |
| C(26)  | 11885(5)  | -2508(5)  | 2512(3)  | 79(2)  |
| C(27)  | 10809(5)  | -3080(5)  | 2303(3)  | 74(2)  |
| C(28)  | 9937(4)   | -2562(4)  | 1776(3)  | 54(1)  |
| C(23') | 10070(50) | -1262(17) | 1510(30) | 44(1)  |
| C(24') | 10817(12) | -596(12)  | 2003(8)  | 78(2)  |

|        |           |           |          |        |
|--------|-----------|-----------|----------|--------|
| C(25') | 11603(13) | -1115(12) | 2565(9)  | 104(2) |
| C(26') | 11595(16) | -2297(14) | 2671(9)  | 79(2)  |
| C(27') | 11028(18) | -3033(17) | 2112(9)  | 74(2)  |
| C(28') | 10222(13) | -2501(14) | 1550(7)  | 54(1)  |
| N(1)   | 2469(1)   | 3463(1)   | -42(1)   | 41(1)  |
| N(2)   | 3686(1)   | 4556(1)   | 799(1)   | 38(1)  |
| O(1)   | 5933(1)   | -886(1)   | 941(1)   | 44(1)  |
| N(4)   | 7952(1)   | -1210(1)  | 963(1)   | 49(1)  |
| N(3)   | 7112(1)   | 770(1)    | 884(1)   | 42(1)  |
| O(2)   | -405(1)   | 8053(1)   | -869(1)  | 63(1)  |
| O(3)   | -716(1)   | 6278(1)   | -1437(1) | 59(1)  |

**Table 3.** Bond lengths [Å] and angles [°] for 100220\_0m.

|            |          |
|------------|----------|
| C(1)-N(1)  | 1.317(2) |
| C(1)-N(2)  | 1.383(2) |
| C(1)-C(15) | 1.479(2) |
| C(2)-N(2)  | 1.394(2) |
| C(2)-C(7)  | 1.395(3) |
| C(2)-C(3)  | 1.396(3) |
| C(3)-C(4)  | 1.370(3) |
| C(3)-H(3)  | 0.9300   |
| C(4)-C(5)  | 1.399(3) |
| C(4)-H(4)  | 0.9300   |
| C(5)-C(6)  | 1.386(2) |
| C(5)-C(8)  | 1.482(3) |
| C(6)-C(7)  | 1.382(2) |
| C(6)-H(6)  | 0.9300   |
| C(7)-N(1)  | 1.392(2) |
| C(8)-O(2)  | 1.204(2) |
| C(8)-O(3)  | 1.340(2) |
| C(9)-O(3)  | 1.435(2) |
| C(9)-H(9A) | 0.9600   |
| C(9)-H(9B) | 0.9600   |

|              |          |
|--------------|----------|
| C(9)-H(9C)   | 0.9600   |
| C(10)-N(2)   | 1.469(2) |
| C(10)-C(14)  | 1.525(3) |
| C(10)-C(11)  | 1.538(3) |
| C(10)-H(10)  | 0.9800   |
| C(11)-C(12)  | 1.529(3) |
| C(11)-H(11A) | 0.9700   |
| C(11)-H(11B) | 0.9700   |
| C(12)-C(13)  | 1.491(4) |
| C(12)-H(12A) | 0.9700   |
| C(12)-H(12B) | 0.9700   |
| C(13)-C(14)  | 1.516(3) |
| C(13)-H(13A) | 0.9700   |
| C(13)-H(13B) | 0.9700   |
| C(14)-H(14A) | 0.9700   |
| C(14)-H(14B) | 0.9700   |
| C(15)-C(16)  | 1.397(3) |
| C(15)-C(21)  | 1.400(3) |
| C(16)-C(17)  | 1.393(2) |
| C(16)-H(16)  | 0.9300   |
| C(17)-C(19)  | 1.387(3) |
| C(17)-N(3)   | 1.400(2) |
| C(18)-N(3)   | 1.300(2) |
| C(18)-N(4)   | 1.336(2) |
| C(18)-O(1)   | 1.383(2) |
| C(19)-C(20)  | 1.366(3) |
| C(19)-O(1)   | 1.381(2) |
| C(20)-C(21)  | 1.390(2) |
| C(20)-H(20)  | 0.9300   |
| C(21)-H(21)  | 0.9300   |
| C(22)-C(23') | 1.44(2)  |
| C(22)-N(4)   | 1.460(3) |
| C(22)-C(23)  | 1.534(7) |
| C(22)-H(22A) | 0.9699   |
| C(22)-H(22B) | 0.9697   |



|                 |            |
|-----------------|------------|
| C(23)-C(24)     | 1.363(12)  |
| C(23)-C(28)     | 1.385(12)  |
| C(24)-C(25)     | 1.383(5)   |
| C(24)-H(24)     | 0.9300     |
| C(25)-C(26)     | 1.357(6)   |
| C(25)-H(25)     | 0.9300     |
| C(26)-C(27)     | 1.359(6)   |
| C(26)-H(26)     | 0.9300     |
| C(27)-C(28)     | 1.387(5)   |
| C(27)-H(27)     | 0.9300     |
| C(28)-H(28)     | 0.9300     |
| C(23')-C(24')   | 1.357(17)  |
| C(23')-C(28')   | 1.384(17)  |
| C(24')-C(25')   | 1.376(13)  |
| C(24')-H(24')   | 0.9300     |
| C(25')-C(26')   | 1.326(14)  |
| C(25')-H(25')   | 0.9300     |
| C(26')-C(27')   | 1.392(15)  |
| C(26')-H(26')   | 0.9300     |
| C(27')-C(28')   | 1.395(14)  |
| C(27')-H(27')   | 0.9300     |
| C(28')-H(28')   | 0.9300     |
| N(4)-H(4A)      | 0.8600     |
| N(1)-C(1)-N(2)  | 112.98(14) |
| N(1)-C(1)-C(15) | 121.68(15) |
| N(2)-C(1)-C(15) | 125.33(15) |
| N(2)-C(2)-C(7)  | 105.81(15) |
| N(2)-C(2)-C(3)  | 132.71(17) |
| C(7)-C(2)-C(3)  | 121.48(16) |
| C(4)-C(3)-C(2)  | 117.09(18) |
| C(4)-C(3)-H(3)  | 121.5      |
| C(2)-C(3)-H(3)  | 121.5      |
| C(3)-C(4)-C(5)  | 122.19(17) |
| C(3)-C(4)-H(4)  | 118.9      |
| C(5)-C(4)-H(4)  | 118.9      |

|                     |            |
|---------------------|------------|
| C(6)-C(5)-C(4)      | 120.24(17) |
| C(6)-C(5)-C(8)      | 121.35(18) |
| C(4)-C(5)-C(8)      | 118.41(17) |
| C(7)-C(6)-C(5)      | 118.39(18) |
| C(7)-C(6)-H(6)      | 120.8      |
| C(5)-C(6)-H(6)      | 120.8      |
| C(6)-C(7)-N(1)      | 129.33(17) |
| C(6)-C(7)-C(2)      | 120.61(16) |
| N(1)-C(7)-C(2)      | 110.05(15) |
| O(2)-C(8)-O(3)      | 122.90(18) |
| O(2)-C(8)-C(5)      | 125.0(2)   |
| O(3)-C(8)-C(5)      | 112.09(17) |
| O(3)-C(9)-H(9A)     | 109.5      |
| O(3)-C(9)-H(9B)     | 109.5      |
| H(9A)-C(9)-H(9B)    | 109.5      |
| O(3)-C(9)-H(9C)     | 109.5      |
| H(9A)-C(9)-H(9C)    | 109.5      |
| H(9B)-C(9)-H(9C)    | 109.5      |
| N(2)-C(10)-C(14)    | 113.10(17) |
| N(2)-C(10)-C(11)    | 114.57(17) |
| C(14)-C(10)-C(11)   | 105.25(16) |
| N(2)-C(10)-H(10)    | 107.9      |
| C(14)-C(10)-H(10)   | 107.9      |
| C(11)-C(10)-H(10)   | 107.9      |
| C(12)-C(11)-C(10)   | 106.2(2)   |
| C(12)-C(11)-H(11A)  | 110.5      |
| C(10)-C(11)-H(11A)  | 110.5      |
| C(12)-C(11)-H(11B)  | 110.5      |
| C(10)-C(11)-H(11B)  | 110.5      |
| H(11A)-C(11)-H(11B) | 108.7      |
| C(13)-C(12)-C(11)   | 105.3(2)   |
| C(13)-C(12)-H(12A)  | 110.7      |
| C(11)-C(12)-H(12A)  | 110.7      |
| C(13)-C(12)-H(12B)  | 110.7      |
| C(11)-C(12)-H(12B)  | 110.7      |

|                     |            |
|---------------------|------------|
| H(12A)-C(12)-H(12B) | 108.8      |
| C(12)-C(13)-C(14)   | 103.8(2)   |
| C(12)-C(13)-H(13A)  | 111.0      |
| C(14)-C(13)-H(13A)  | 111.0      |
| C(12)-C(13)-H(13B)  | 111.0      |
| C(14)-C(13)-H(13B)  | 111.0      |
| H(13A)-C(13)-H(13B) | 109.0      |
| C(13)-C(14)-C(10)   | 104.7(2)   |
| C(13)-C(14)-H(14A)  | 110.8      |
| C(10)-C(14)-H(14A)  | 110.8      |
| C(13)-C(14)-H(14B)  | 110.8      |
| C(10)-C(14)-H(14B)  | 110.8      |
| H(14A)-C(14)-H(14B) | 108.9      |
| C(16)-C(15)-C(21)   | 120.83(16) |
| C(16)-C(15)-C(1)    | 122.14(16) |
| C(21)-C(15)-C(1)    | 116.69(17) |
| C(17)-C(16)-C(15)   | 117.65(17) |
| C(17)-C(16)-H(16)   | 121.2      |
| C(15)-C(16)-H(16)   | 121.2      |
| C(19)-C(17)-C(16)   | 119.43(17) |
| C(19)-C(17)-N(3)    | 109.71(15) |
| C(16)-C(17)-N(3)    | 130.74(17) |
| N(3)-C(18)-N(4)     | 129.38(19) |
| N(3)-C(18)-O(1)     | 116.08(16) |
| N(4)-C(18)-O(1)     | 114.54(16) |
| C(20)-C(19)-O(1)    | 127.96(16) |
| C(20)-C(19)-C(17)   | 124.42(16) |
| O(1)-C(19)-C(17)    | 107.60(16) |
| C(19)-C(20)-C(21)   | 115.94(17) |
| C(19)-C(20)-H(20)   | 122.0      |
| C(21)-C(20)-H(20)   | 122.0      |
| C(20)-C(21)-C(15)   | 121.67(18) |
| C(20)-C(21)-H(21)   | 119.2      |
| C(15)-C(21)-H(21)   | 119.2      |
| C(23')-C(22)-N(4)   | 113(3)     |

|                      |           |
|----------------------|-----------|
| C(23')-C(22)-C(23)   | 7(2)      |
| N(4)-C(22)-C(23)     | 111.9(8)  |
| C(23')-C(22)-H(22A)  | 104.0     |
| N(4)-C(22)-H(22A)    | 109.2     |
| C(23)-C(22)-H(22A)   | 110.8     |
| C(23')-C(22)-H(22B)  | 113.3     |
| N(4)-C(22)-H(22B)    | 109.2     |
| C(23)-C(22)-H(22B)   | 107.9     |
| H(22A)-C(22)-H(22B)  | 107.9     |
| C(24)-C(23)-C(28)    | 118.9(5)  |
| C(24)-C(23)-C(22)    | 118.7(8)  |
| C(28)-C(23)-C(22)    | 122.3(8)  |
| C(23)-C(24)-C(25)    | 119.7(5)  |
| C(23)-C(24)-H(24)    | 120.1     |
| C(25)-C(24)-H(24)    | 120.1     |
| C(26)-C(25)-C(24)    | 121.3(4)  |
| C(26)-C(25)-H(25)    | 119.4     |
| C(24)-C(25)-H(25)    | 119.4     |
| C(25)-C(26)-C(27)    | 119.9(4)  |
| C(25)-C(26)-H(26)    | 120.0     |
| C(27)-C(26)-H(26)    | 120.1     |
| C(26)-C(27)-C(28)    | 119.4(5)  |
| C(26)-C(27)-H(27)    | 120.3     |
| C(28)-C(27)-H(27)    | 120.3     |
| C(23)-C(28)-C(27)    | 120.7(5)  |
| C(23)-C(28)-H(28)    | 119.7     |
| C(27)-C(28)-H(28)    | 119.7     |
| C(24')-C(23')-C(28') | 116.3(15) |
| C(24')-C(23')-C(22)  | 127.5(15) |
| C(28')-C(23')-C(22)  | 116.1(15) |
| C(23')-C(24')-C(25') | 122.3(13) |
| C(23')-C(24')-H(24') | 118.8     |
| C(25')-C(24')-H(24') | 118.8     |
| C(26')-C(25')-C(24') | 120.5(12) |
| C(26')-C(25')-H(25') | 119.7     |

|                      |            |
|----------------------|------------|
| C(24')-C(25')-H(25') | 119.7      |
| C(25')-C(26')-C(27') | 118.7(14)  |
| C(25')-C(26')-H(26') | 120.7      |
| C(27')-C(26')-H(26') | 120.7      |
| C(26')-C(27')-C(28') | 118.2(14)  |
| C(26')-C(27')-H(27') | 120.9      |
| C(28')-C(27')-H(27') | 120.9      |
| C(23')-C(28')-C(27') | 121.4(15)  |
| C(23')-C(28')-H(28') | 119.3      |
| C(27')-C(28')-H(28') | 119.3      |
| C(1)-N(1)-C(7)       | 105.25(14) |
| C(1)-N(2)-C(2)       | 105.91(14) |
| C(1)-N(2)-C(10)      | 127.60(14) |
| C(2)-N(2)-C(10)      | 126.41(14) |
| C(19)-O(1)-C(18)     | 103.26(13) |
| C(18)-N(4)-C(22)     | 120.43(16) |
| C(18)-N(4)-H(4A)     | 119.8      |
| C(22)-N(4)-H(4A)     | 119.8      |
| C(18)-N(3)-C(17)     | 103.31(16) |
| C(8)-O(3)-C(9)       | 116.28(17) |

Symmetry transformations used to generate equivalent atoms:

**Table 4.** Anisotropic displacement parameters ( $\text{\AA}^2 \times 10^3$ ) for 100220\_0m. The anisotropic displacement factor exponent takes the form:  $-2\pi^2 [ h^2 a^{*2} U^{11} + \dots + 2 h k a^* b^* U^{12} ]$

|      | $U^{11}$ | $U^{22}$ | $U^{33}$ | $U^{23}$ | $U^{13}$ | $U^{12}$ |
|------|----------|----------|----------|----------|----------|----------|
| C(1) | 40(1)    | 31(1)    | 40(1)    | 0(1)     | 6(1)     | 4(1)     |
| C(2) | 39(1)    | 33(1)    | 42(1)    | 3(1)     | 8(1)     | 6(1)     |
| C(3) | 54(1)    | 30(1)    | 53(1)    | -4(1)    | 1(1)     | 4(1)     |
| C(4) | 52(1)    | 31(1)    | 62(1)    | 3(1)     | 9(1)     | 9(1)     |
| C(5) | 40(1)    | 38(1)    | 52(1)    | 8(1)     | 11(1)    | 8(1)     |
| C(6) | 42(1)    | 40(1)    | 48(1)    | -1(1)    | 1(1)     | 6(1)     |
| C(7) | 40(1)    | 31(1)    | 43(1)    | 0(1)     | 7(1)     | 5(1)     |

|        |        |       |        |        |        |        |
|--------|--------|-------|--------|--------|--------|--------|
| C(8)   | 42(1)  | 44(1) | 56(1)  | 10(1)  | 11(1)  | 5(1)   |
| C(9)   | 49(1)  | 80(2) | 60(2)  | 16(1)  | -1(1)  | 13(1)  |
| C(10)  | 44(1)  | 37(1) | 41(1)  | -1(1)  | -1(1)  | 4(1)   |
| C(11)  | 71(2)  | 56(1) | 42(1)  | -6(1)  | 7(1)   | 0(1)   |
| C(12)  | 104(2) | 61(2) | 64(2)  | -19(1) | -5(2)  | -5(2)  |
| C(13)  | 76(2)  | 56(1) | 83(2)  | -1(1)  | -15(2) | -15(1) |
| C(14)  | 50(1)  | 62(1) | 62(2)  | 0(1)   | 4(1)   | -5(1)  |
| C(15)  | 41(1)  | 32(1) | 36(1)  | -2(1)  | 3(1)   | 7(1)   |
| C(16)  | 43(1)  | 31(1) | 42(1)  | -2(1)  | 4(1)   | 2(1)   |
| C(17)  | 39(1)  | 34(1) | 37(1)  | -4(1)  | 1(1)   | 4(1)   |
| C(18)  | 39(1)  | 39(1) | 42(1)  | -4(1)  | -5(1)  | 5(1)   |
| C(19)  | 42(1)  | 30(1) | 38(1)  | 0(1)   | -1(1)  | 8(1)   |
| C(20)  | 43(1)  | 32(1) | 53(1)  | 2(1)   | 4(1)   | 0(1)   |
| C(21)  | 38(1)  | 38(1) | 46(1)  | 1(1)   | 2(1)   | 4(1)   |
| C(22)  | 43(1)  | 52(1) | 60(1)  | 6(1)   | 4(1)   | 9(1)   |
| C(23)  | 38(2)  | 38(2) | 53(2)  | -6(3)  | 6(2)   | 13(3)  |
| C(24)  | 58(3)  | 53(2) | 112(4) | -1(2)  | -16(3) | 3(2)   |
| C(25)  | 69(3)  | 75(3) | 145(5) | -18(3) | -44(3) | 15(2)  |
| C(26)  | 68(3)  | 94(3) | 68(3)  | -1(2)  | -5(2)  | 44(2)  |
| C(27)  | 72(3)  | 77(2) | 77(4)  | 28(2)  | 27(2)  | 33(2)  |
| C(28)  | 52(3)  | 55(2) | 57(3)  | 8(2)   | 13(2)  | 12(2)  |
| C(23') | 38(2)  | 38(2) | 53(2)  | -6(3)  | 6(2)   | 13(3)  |
| C(24') | 58(3)  | 53(2) | 112(4) | -1(2)  | -16(3) | 3(2)   |
| C(25') | 69(3)  | 75(3) | 145(5) | -18(3) | -44(3) | 15(2)  |
| C(26') | 68(3)  | 94(3) | 68(3)  | -1(2)  | -5(2)  | 44(2)  |
| C(27') | 72(3)  | 77(2) | 77(4)  | 28(2)  | 27(2)  | 33(2)  |
| C(28') | 52(3)  | 55(2) | 57(3)  | 8(2)   | 13(2)  | 12(2)  |
| N(1)   | 43(1)  | 33(1) | 46(1)  | -2(1)  | 0(1)   | 7(1)   |
| N(2)   | 42(1)  | 30(1) | 40(1)  | -1(1)  | 2(1)   | 4(1)   |
| O(1)   | 43(1)  | 30(1) | 56(1)  | 1(1)   | 0(1)   | 7(1)   |
| N(4)   | 42(1)  | 37(1) | 65(1)  | 1(1)   | -1(1)  | 10(1)  |
| N(3)   | 39(1)  | 34(1) | 50(1)  | -4(1)  | 1(1)   | 7(1)   |
| O(2)   | 54(1)  | 42(1) | 90(1)  | 10(1)  | 3(1)   | 15(1)  |
| O(3)   | 58(1)  | 57(1) | 57(1)  | 6(1)   | -6(1)  | 15(1)  |

**Table 5.** Hydrogen coordinates ( $\times 10^4$ ) and isotropic displacement parameters ( $\text{\AA}^2 \times 10^{-3}$ ) for 100220\_0m.

|        | x     | y     | z     | U(eq) |
|--------|-------|-------|-------|-------|
| H(3)   | 3098  | 7036  | 871   | 56    |
| H(4)   | 1483  | 7893  | 110   | 58    |
| H(6)   | 613   | 4716  | -880  | 53    |
| H(9A)  | -2371 | 6935  | -1704 | 97    |
| H(9B)  | -1914 | 6277  | -2344 | 97    |
| H(9C)  | -1429 | 7567  | -2104 | 97    |
| H(10)  | 5033  | 4091  | 1599  | 50    |
| H(11A) | 3342  | 5691  | 1913  | 68    |
| H(11B) | 4285  | 4954  | 2467  | 68    |
| H(12A) | 4538  | 7317  | 1993  | 95    |
| H(12B) | 5171  | 6743  | 2732  | 95    |
| H(13A) | 6661  | 5913  | 2231  | 91    |
| H(13B) | 6450  | 7133  | 1793  | 91    |
| H(14A) | 6261  | 5215  | 1068  | 70    |
| H(14B) | 5274  | 6218  | 826   | 70    |
| H(16)  | 5822  | 2944  | 705   | 47    |
| H(20)  | 3512  | -549  | 889   | 52    |
| H(21)  | 2593  | 1346  | 722   | 50    |
| H(22A) | 9235  | 44    | 961   | 63    |
| H(22B) | 9356  | -1045 | 445   | 63    |
| H(24)  | 11342 | -109  | 1540  | 94    |
| H(25)  | 12802 | -1011 | 2392  | 124   |
| H(26)  | 12492 | -2869 | 2845  | 95    |
| H(27)  | 10659 | -3813 | 2511  | 88    |
| H(28)  | 9217  | -2971 | 1614  | 65    |
| H(24') | 10797 | 240   | 1963  | 94    |
| H(25') | 12144 | -632  | 2872  | 124   |
| H(26') | 11961 | -2628 | 3110  | 95    |
| H(27') | 11182 | -3858 | 2114  | 88    |
| H(28') | 9777  | -2988 | 1197  | 65    |
| H(4A)  | 7800  | -1962 | 1014  | 59    |

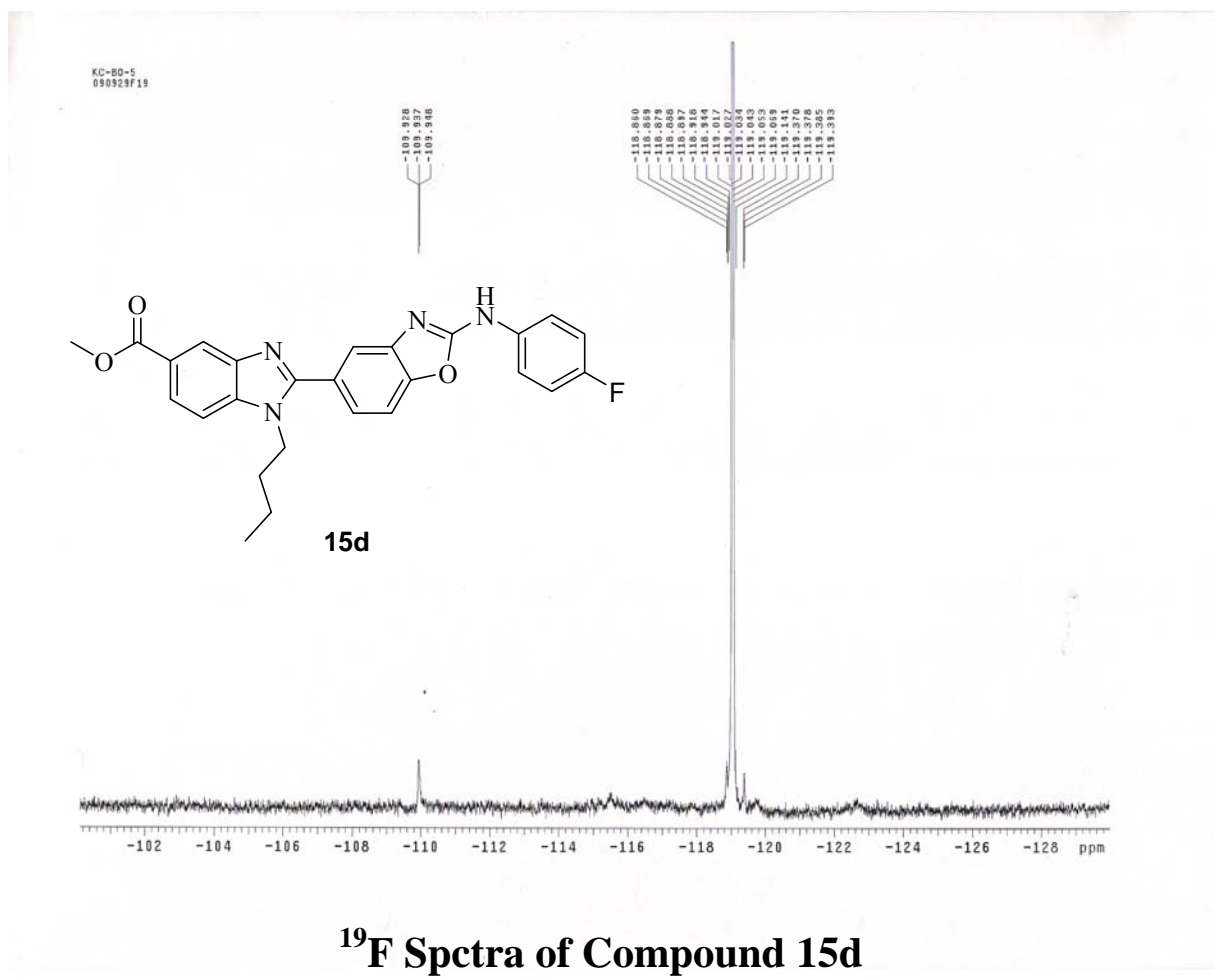



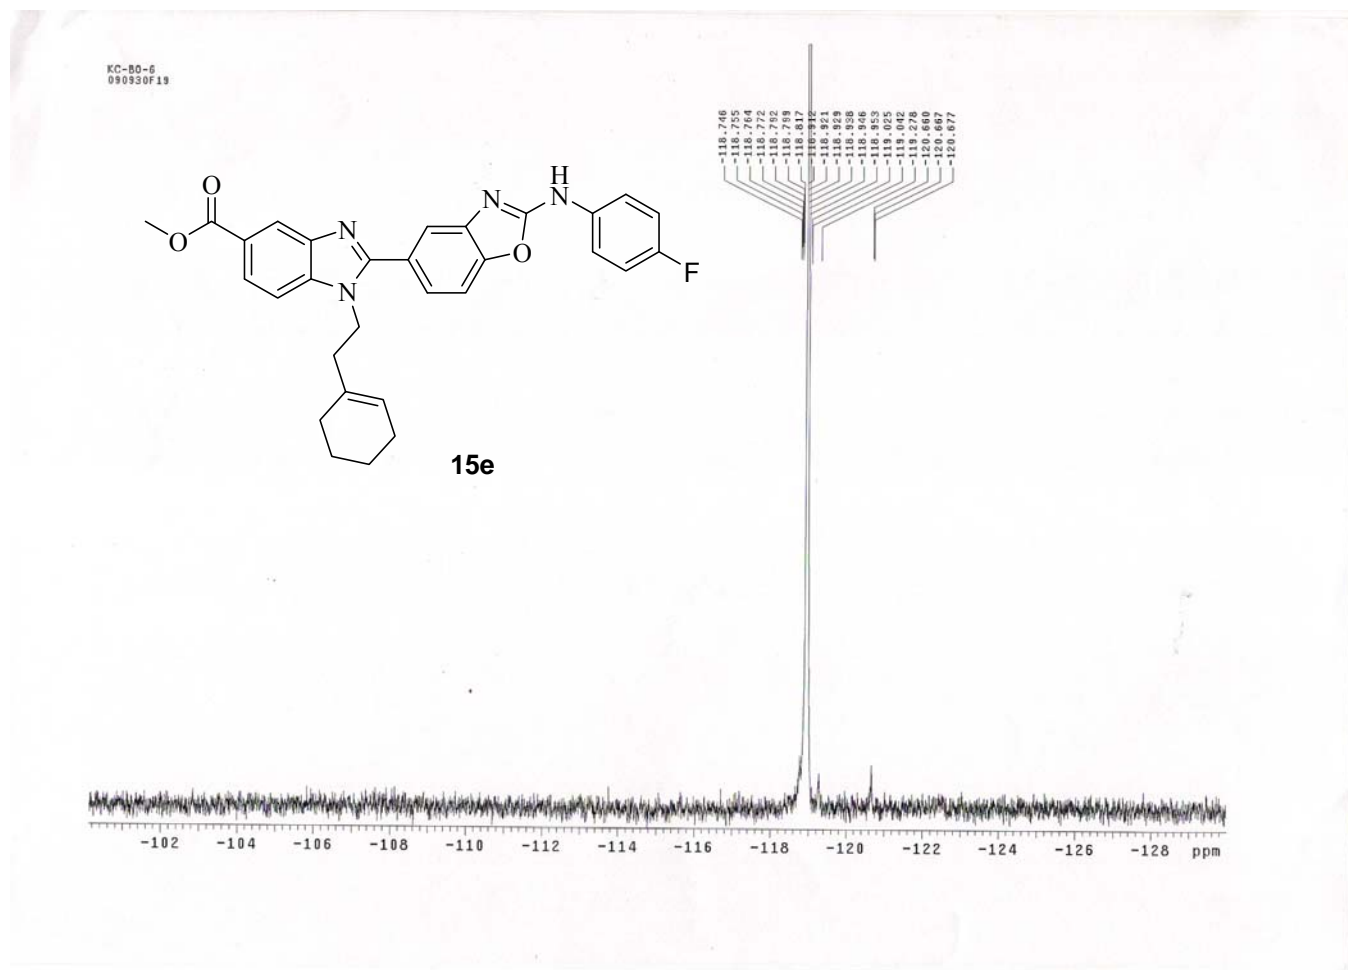

**$^{19}\text{F}$  Spectra of Compound 15e**

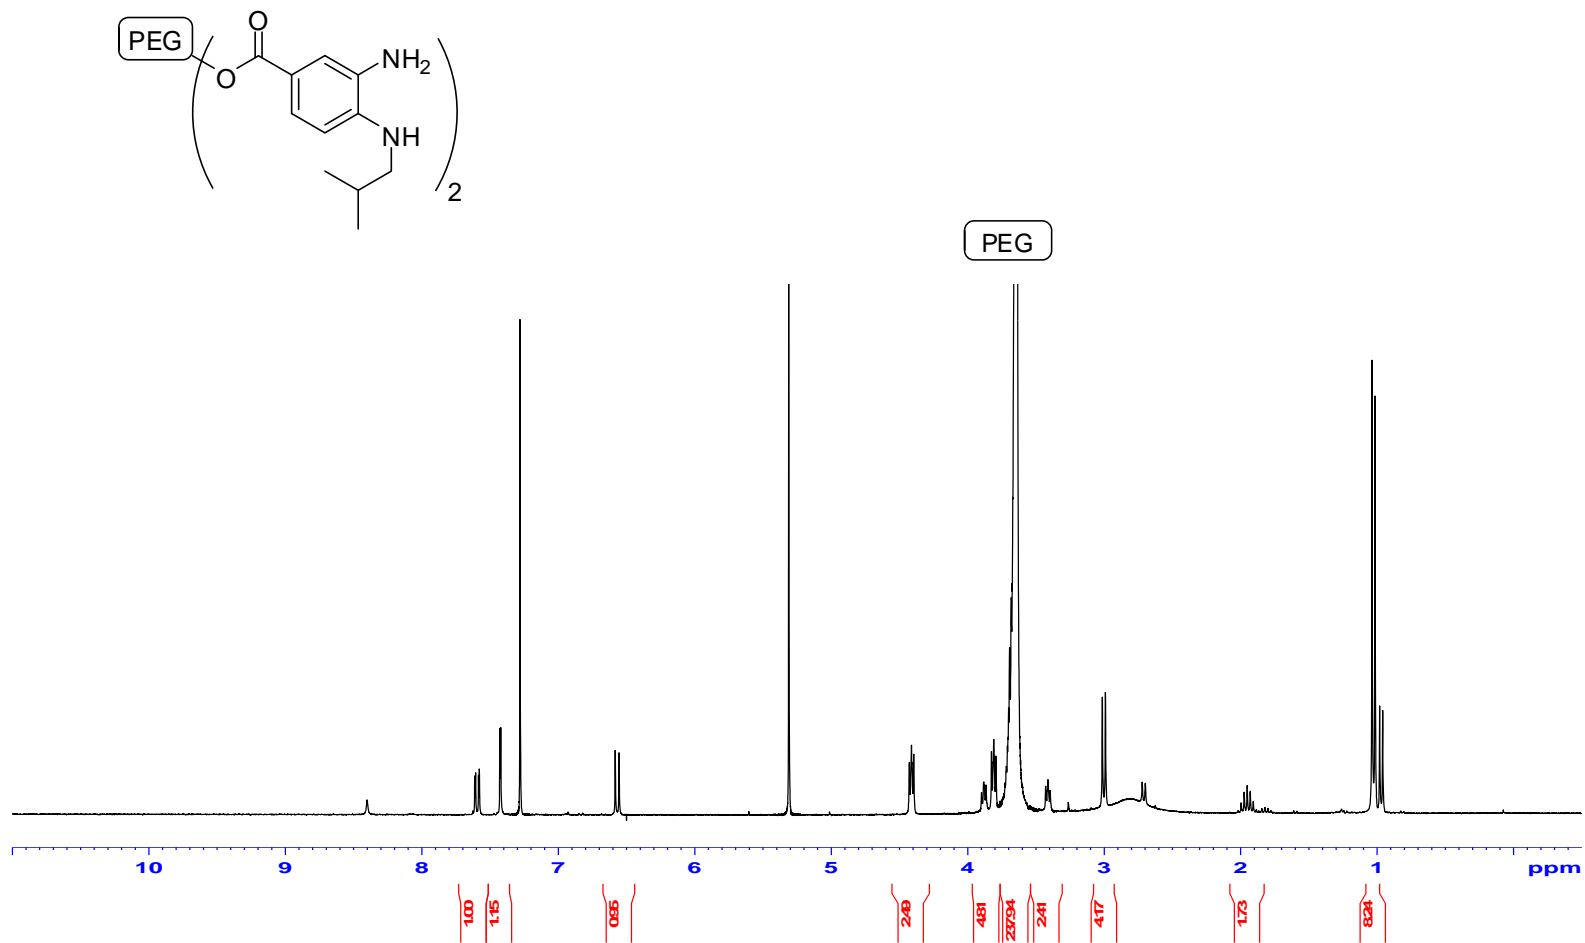

<sup>1</sup>H NMR Spectrum (300 MHz) of compound 9a in CDCl<sub>3</sub>

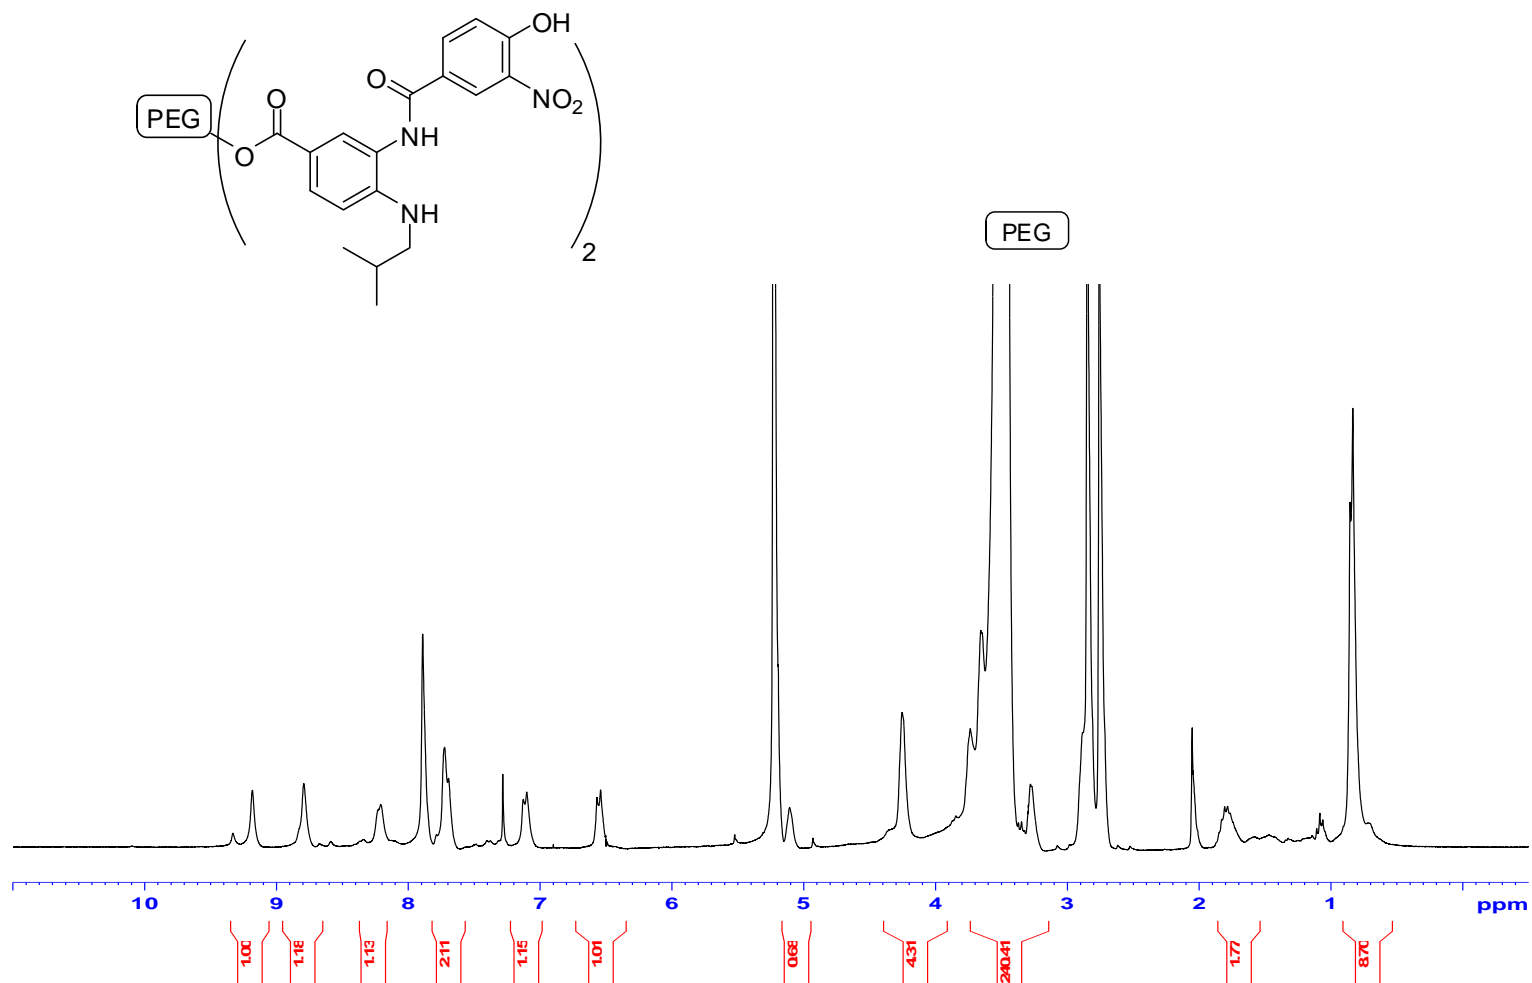

<sup>1</sup>H NMR Spectrum (300 MHz) of compound 11a in CDCl<sub>3</sub>

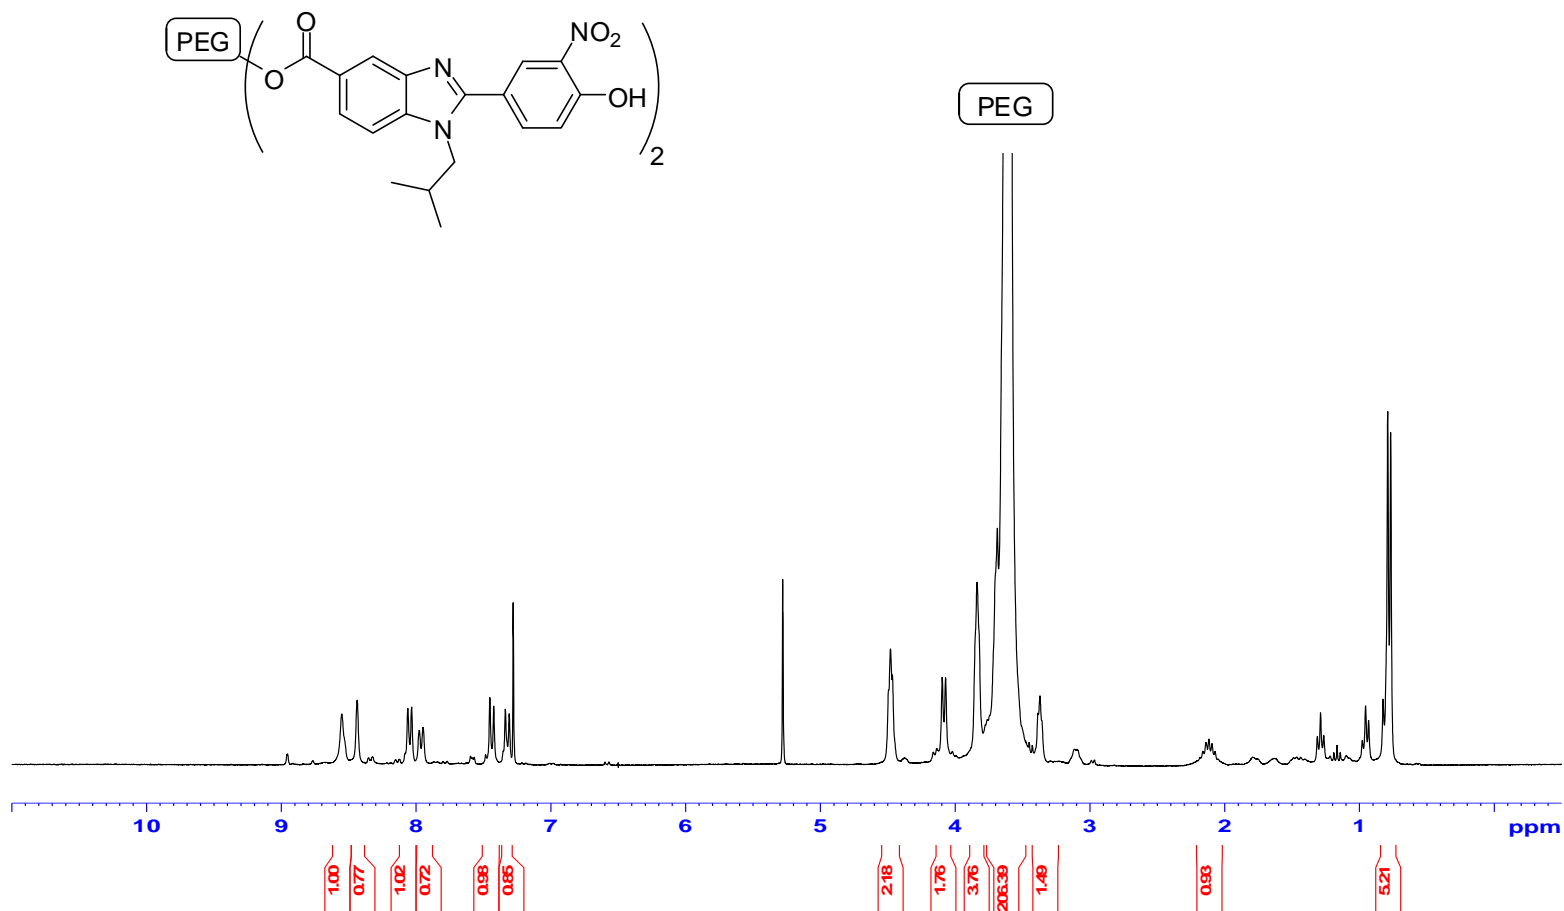

<sup>1</sup>H NMR Spectrum (300 MHz) of compound 12a in CDCl<sub>3</sub>

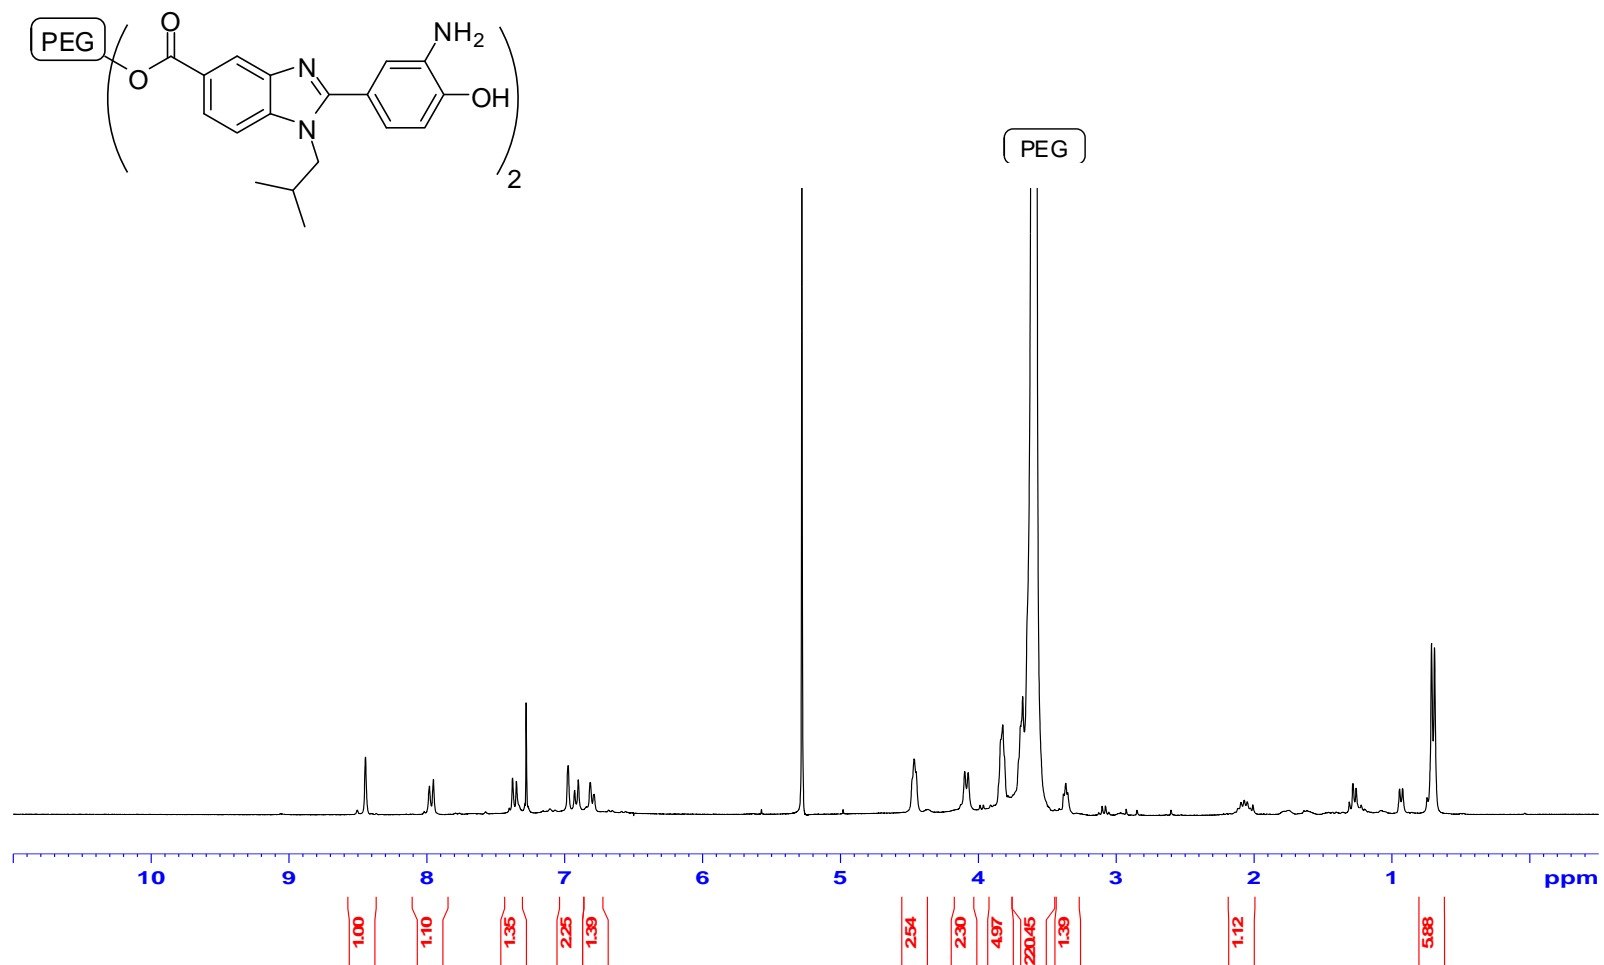

<sup>1</sup>H NMR Spectrum (300 MHz) of compound 13a in CDCl<sub>3</sub>

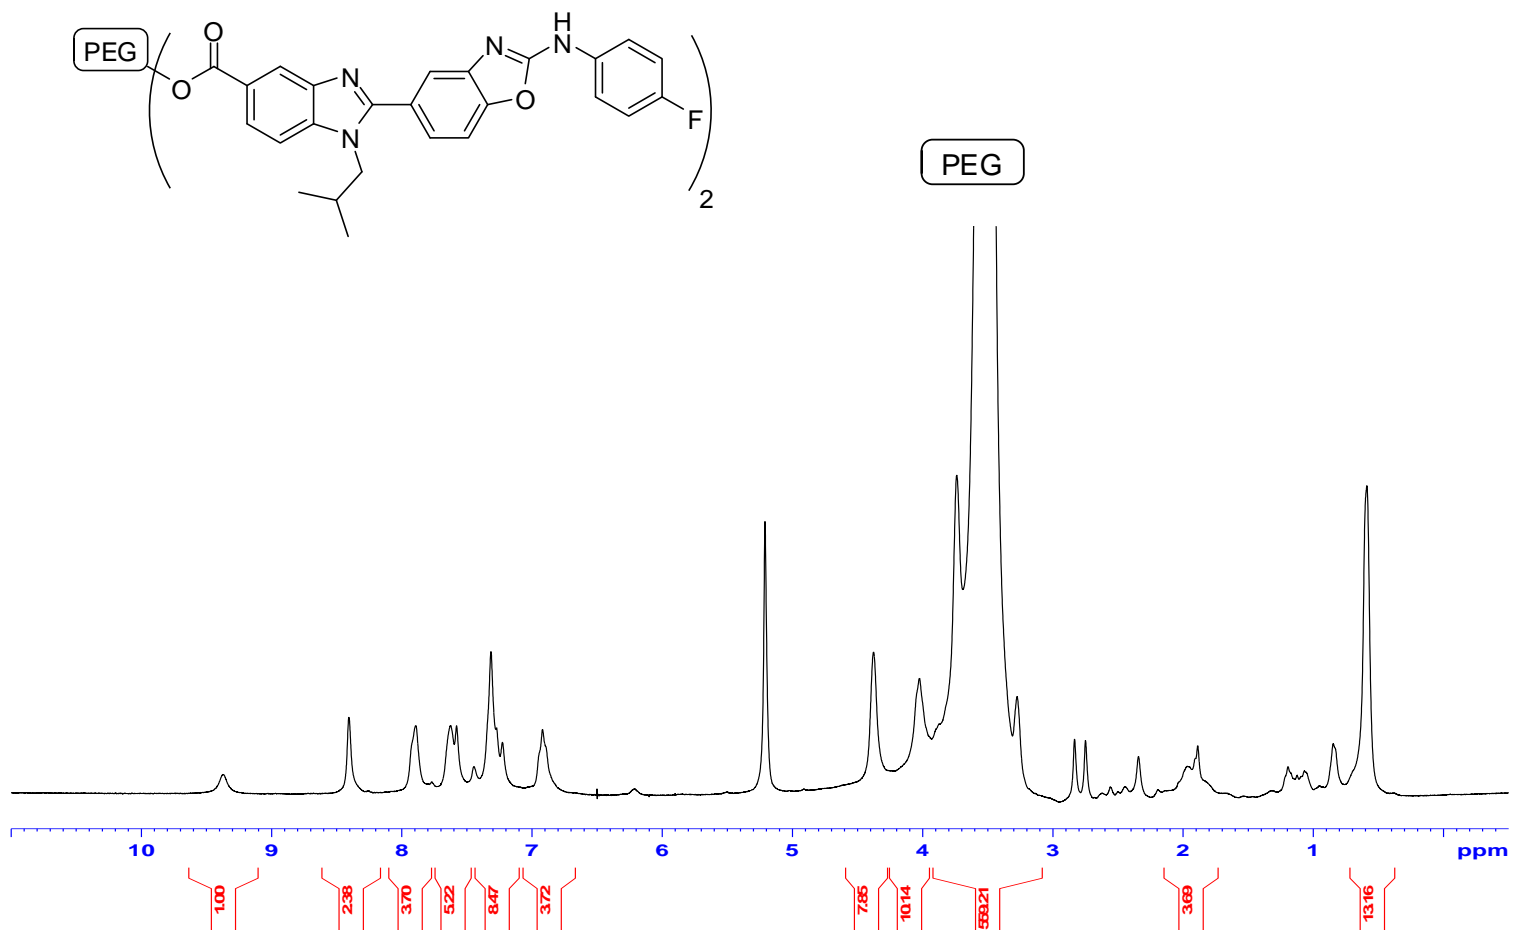

<sup>1</sup>H NMR Spectrum (300 MHz) of compound 14a in CDCl<sub>3</sub>

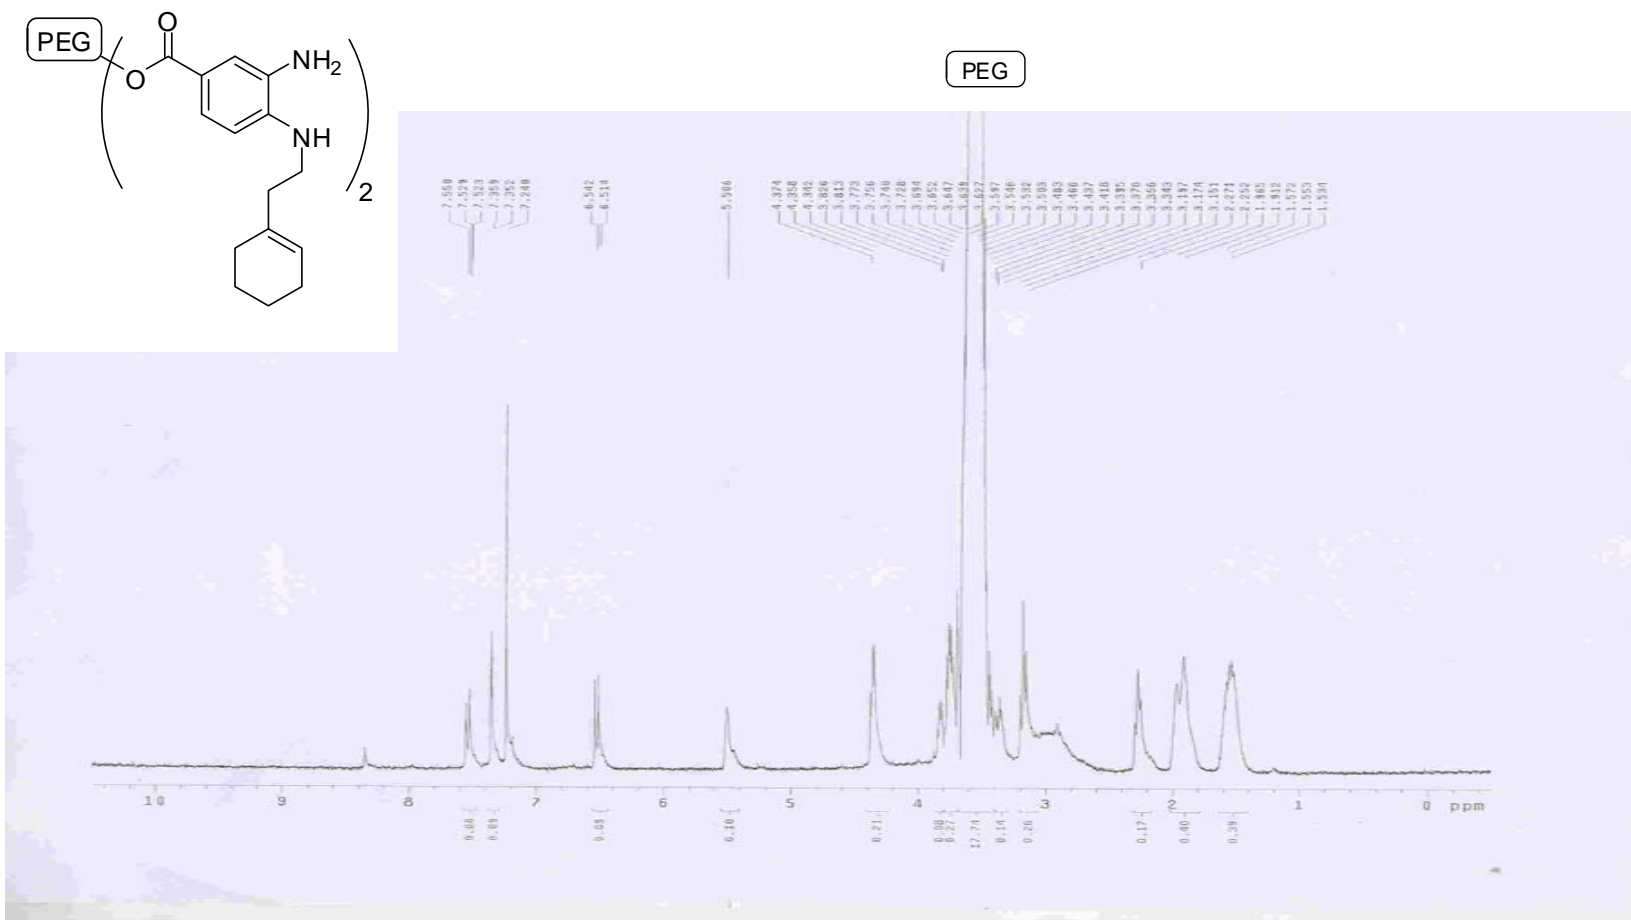

**<sup>1</sup>H NMR Spectrum (300 MHz) of compound 9f in CDCl<sub>3</sub>**

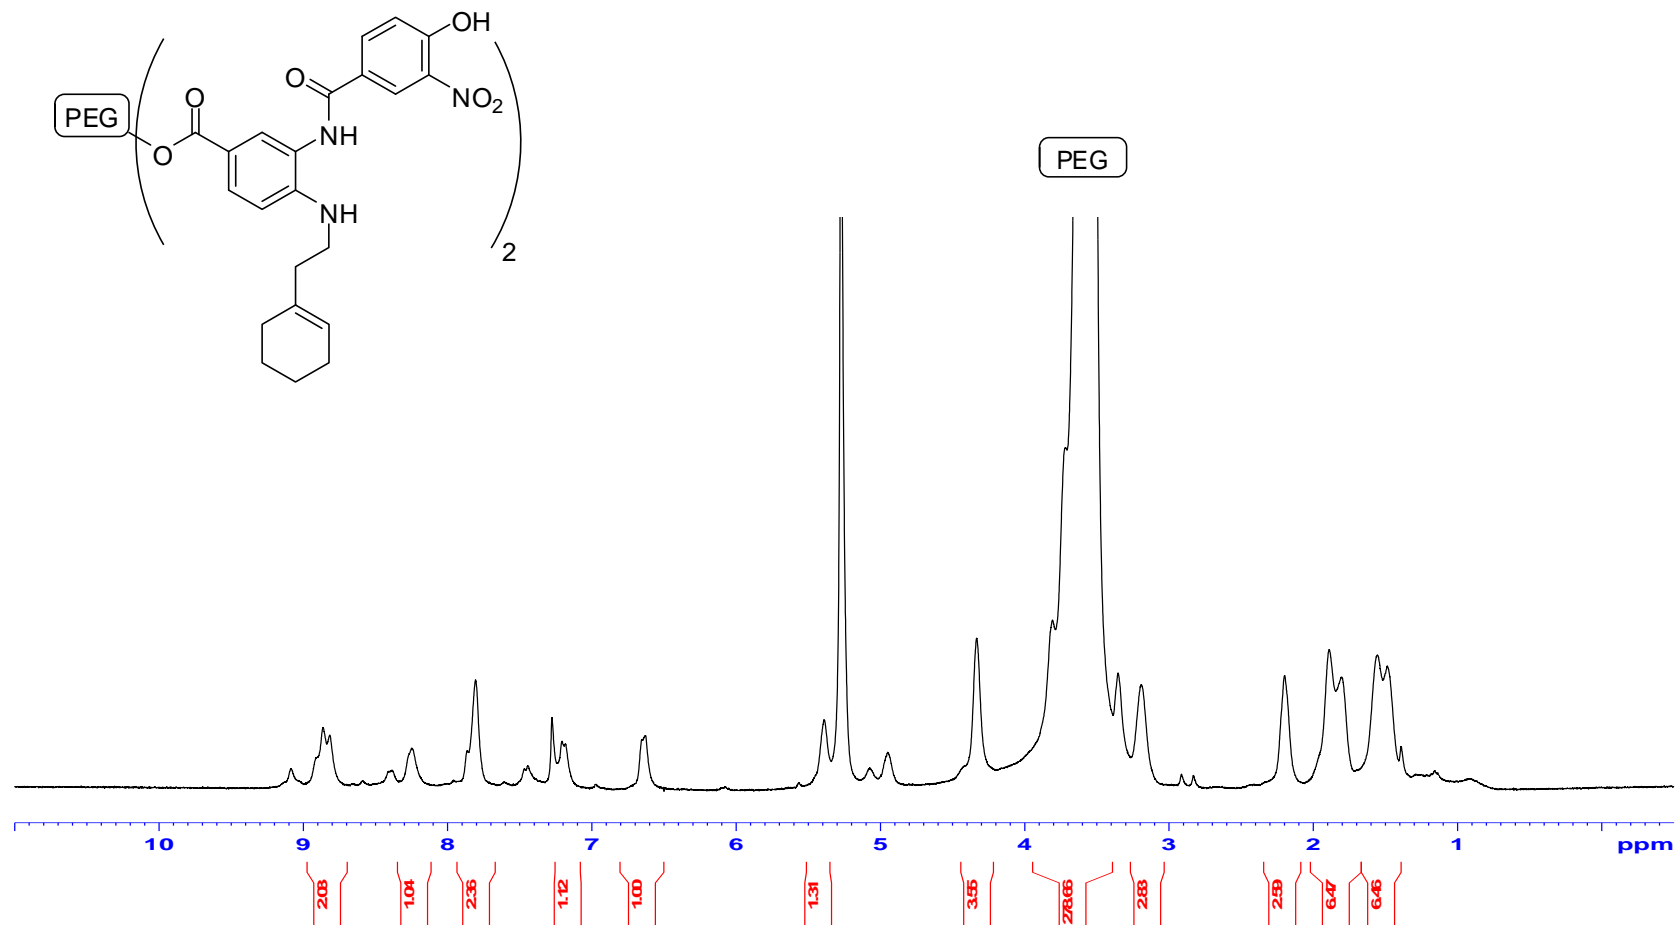

<sup>1</sup>H NMR Spectrum (300 MHz) of compound 11f in CDCl<sub>3</sub>



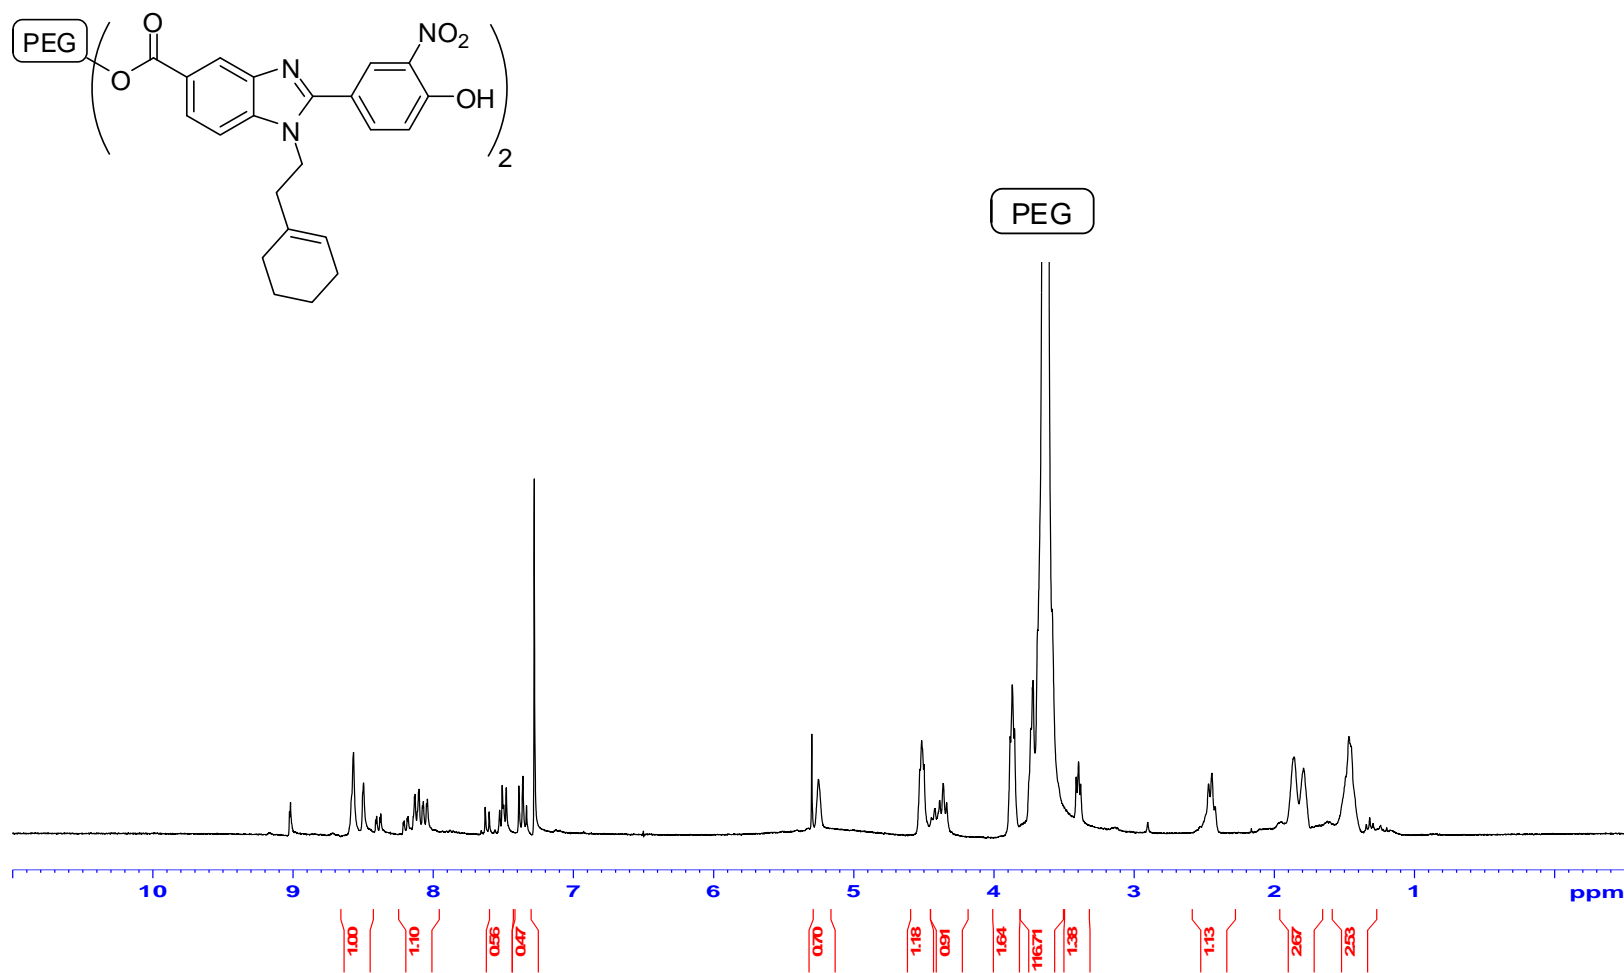

<sup>1</sup>H NMR Spectrum (300 MHz) of compound 12f in CDCl<sub>3</sub>

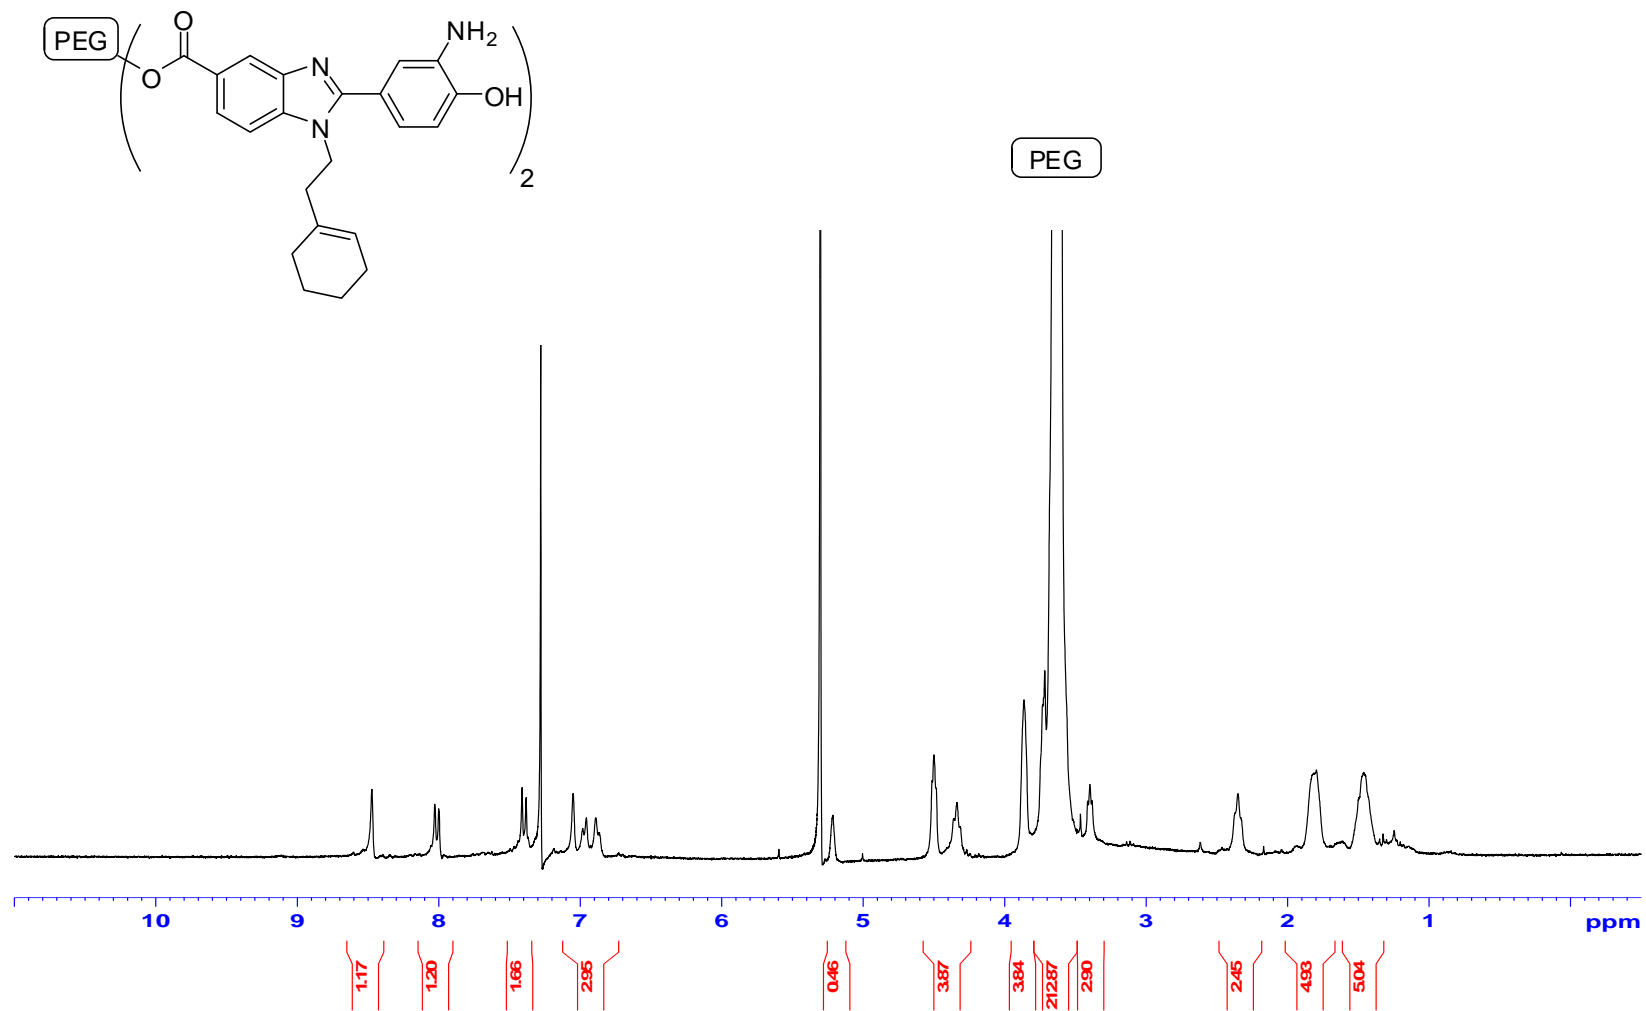

<sup>1</sup>H NMR Spectrum (300 MHz) of compound 13f in CDCl<sub>3</sub>

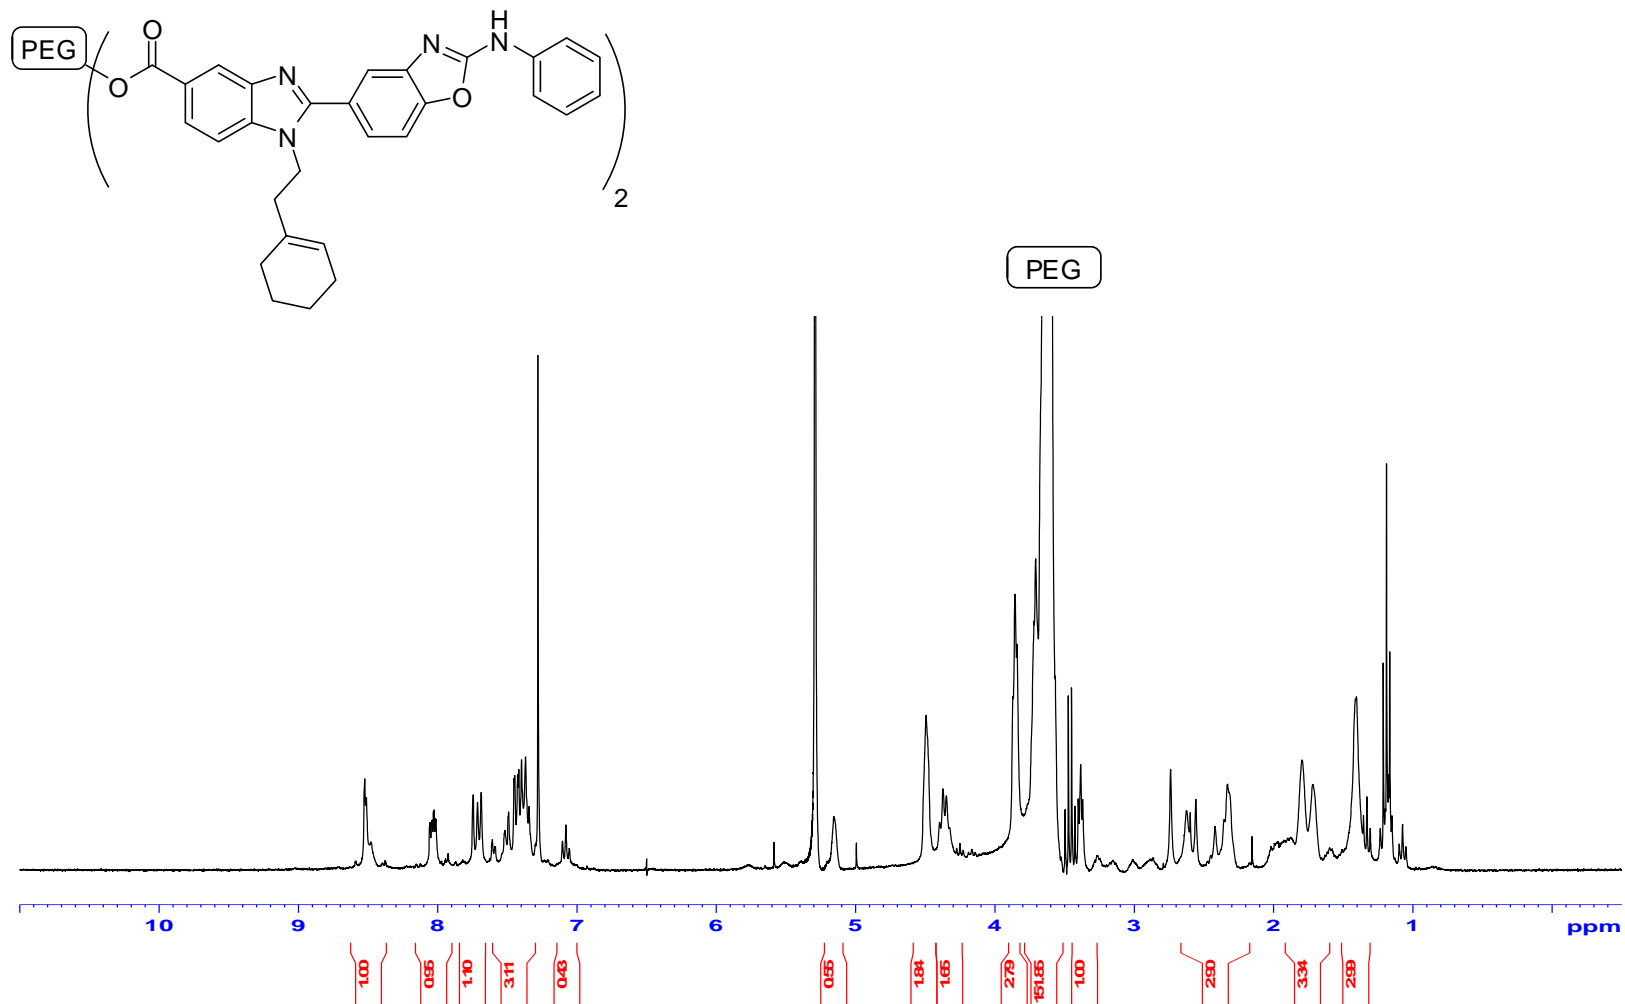

<sup>1</sup>H NMR Spectrum (300 MHz) of compound 14f in CDCl<sub>3</sub>

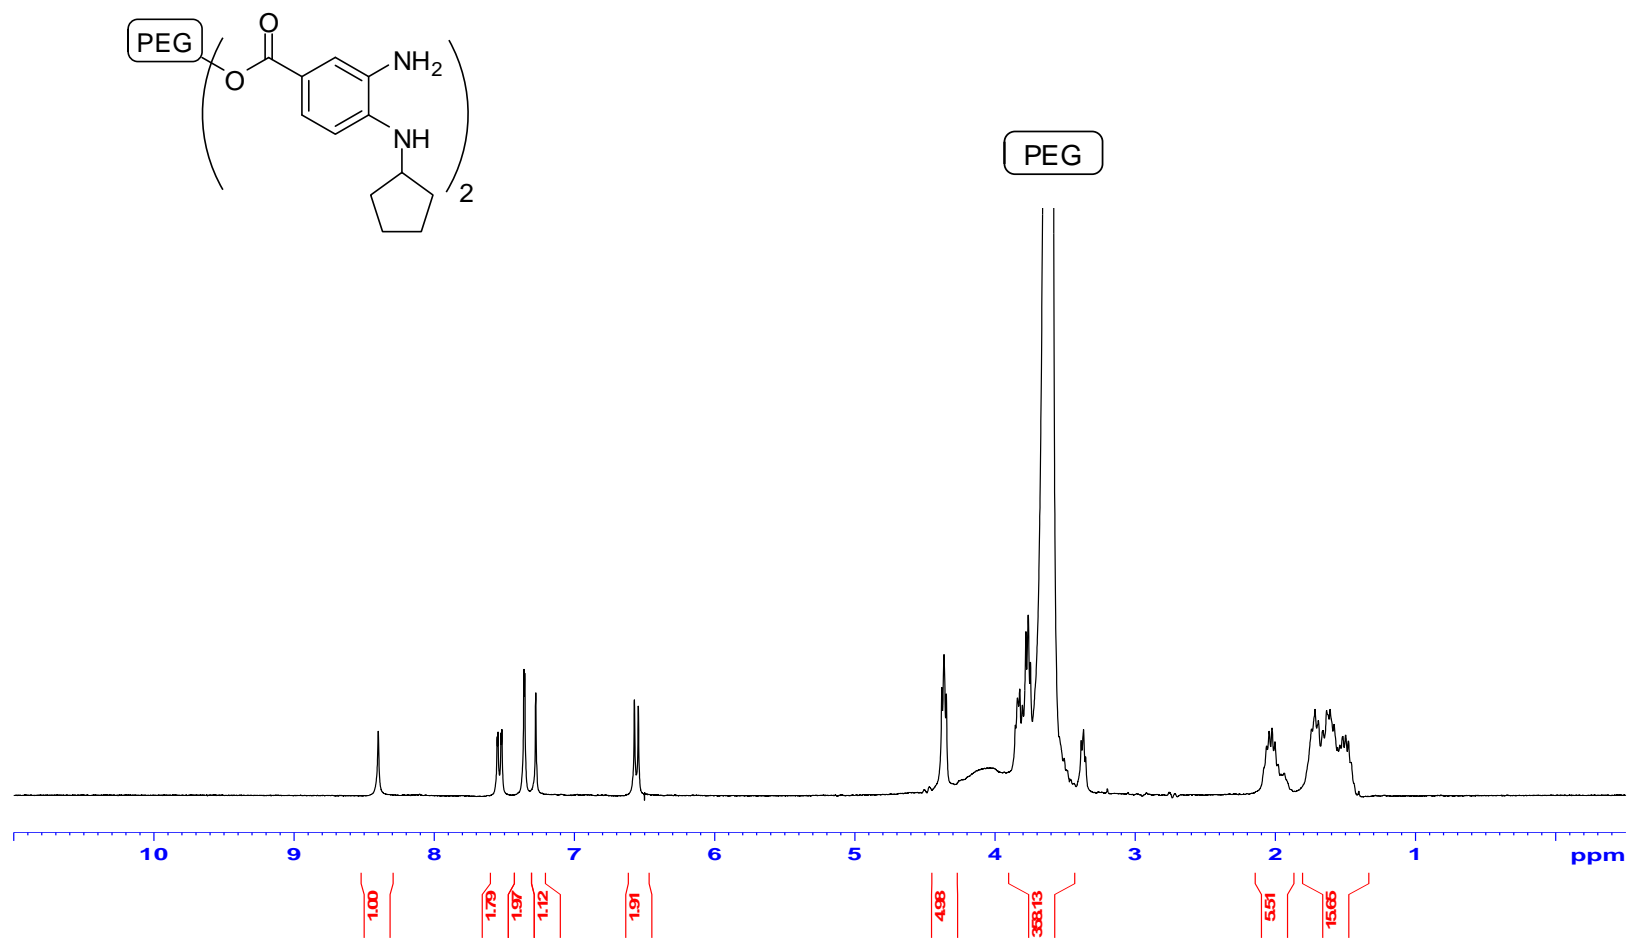

<sup>1</sup>H NMR Spectrum (300 MHz) of compound 9n in CDCl<sub>3</sub>

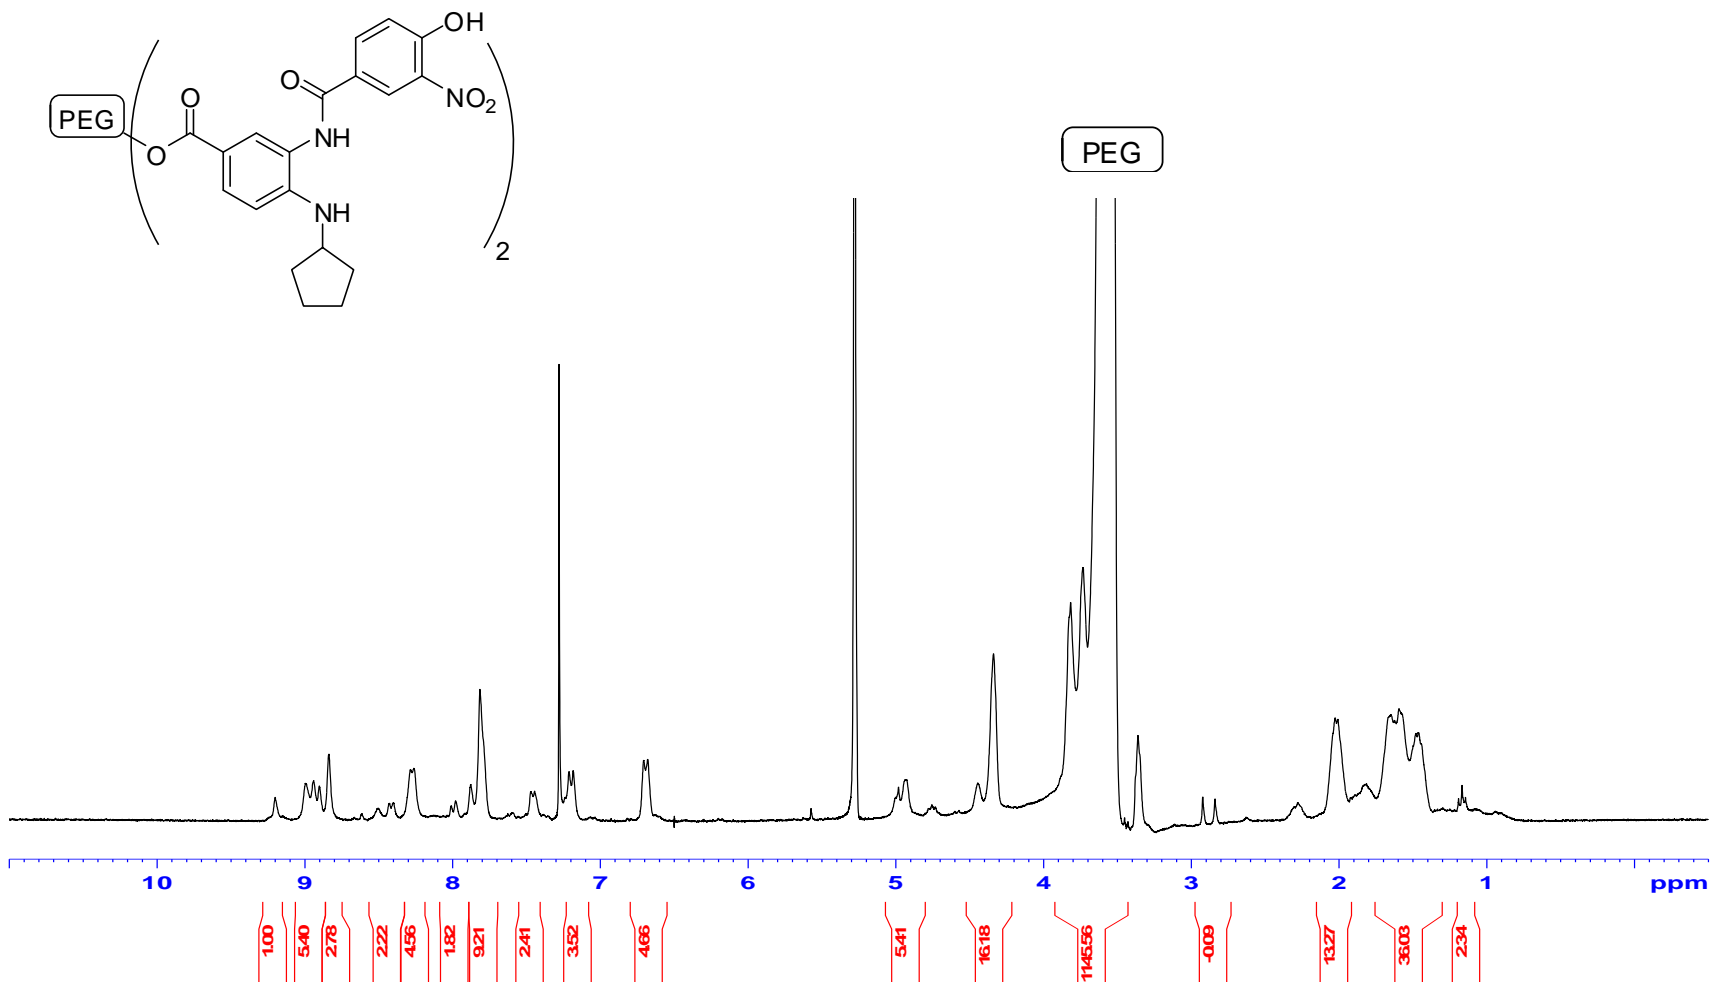

<sup>1</sup>H NMR Spectrum (300 MHz) of compound 11n in CDCl<sub>3</sub>

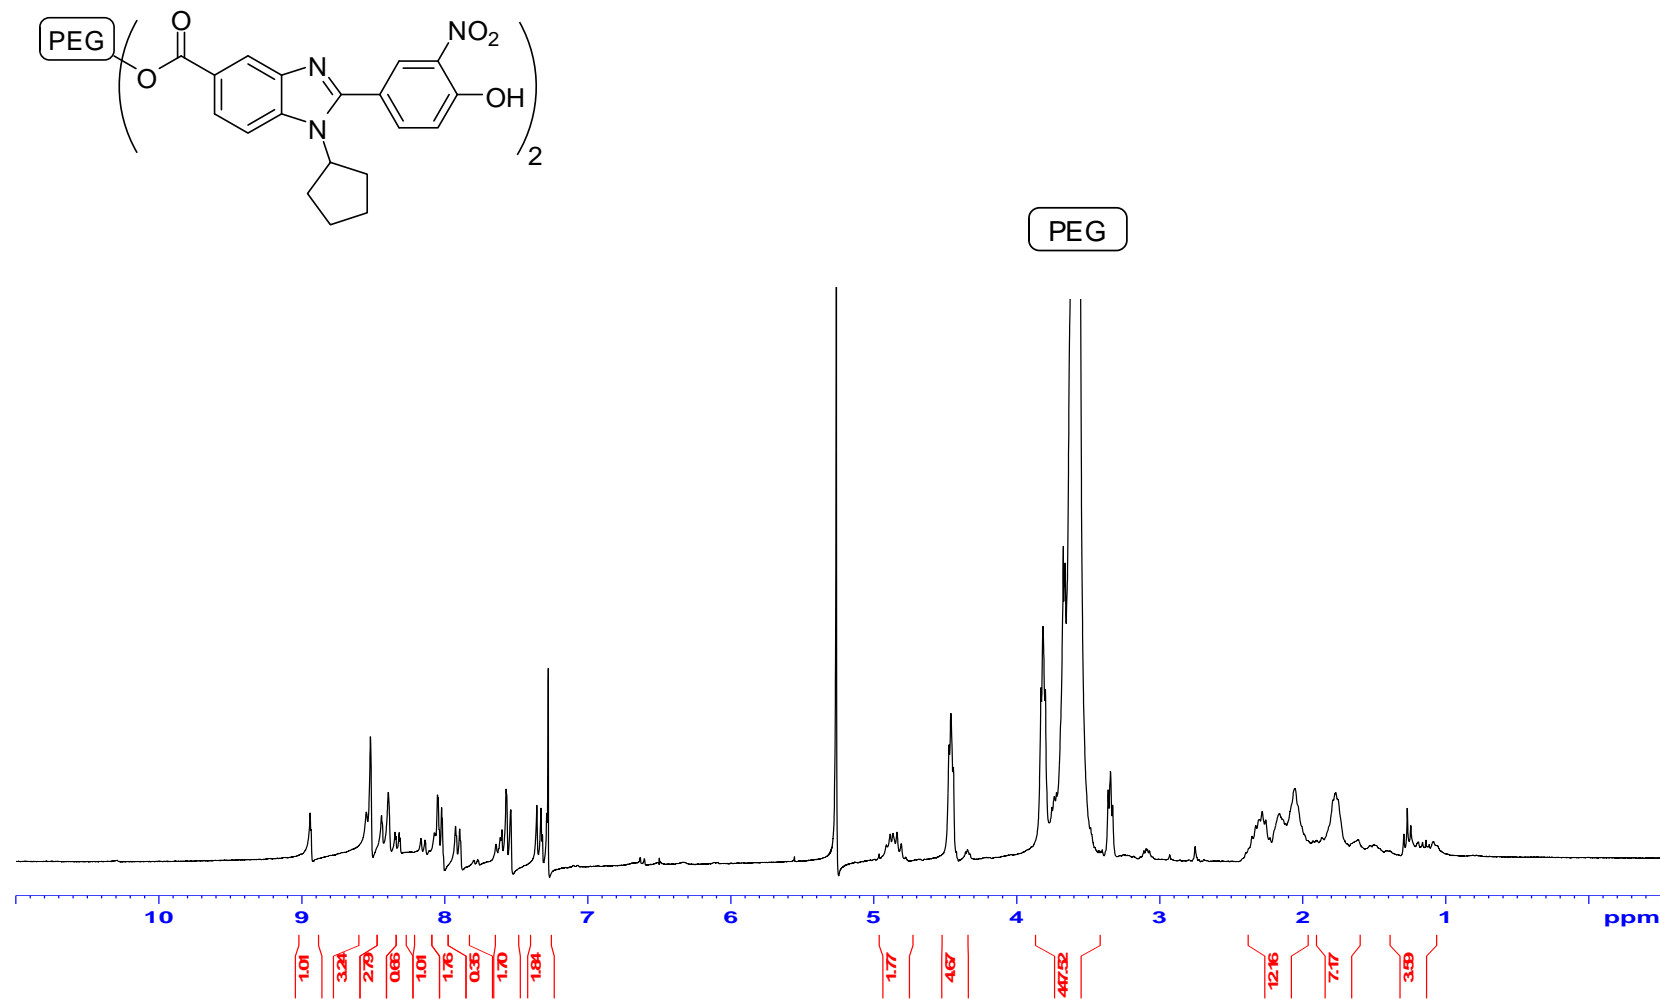

<sup>1</sup>H NMR Spectrum (300 MHz) of compound 12n in CDCl<sub>3</sub>

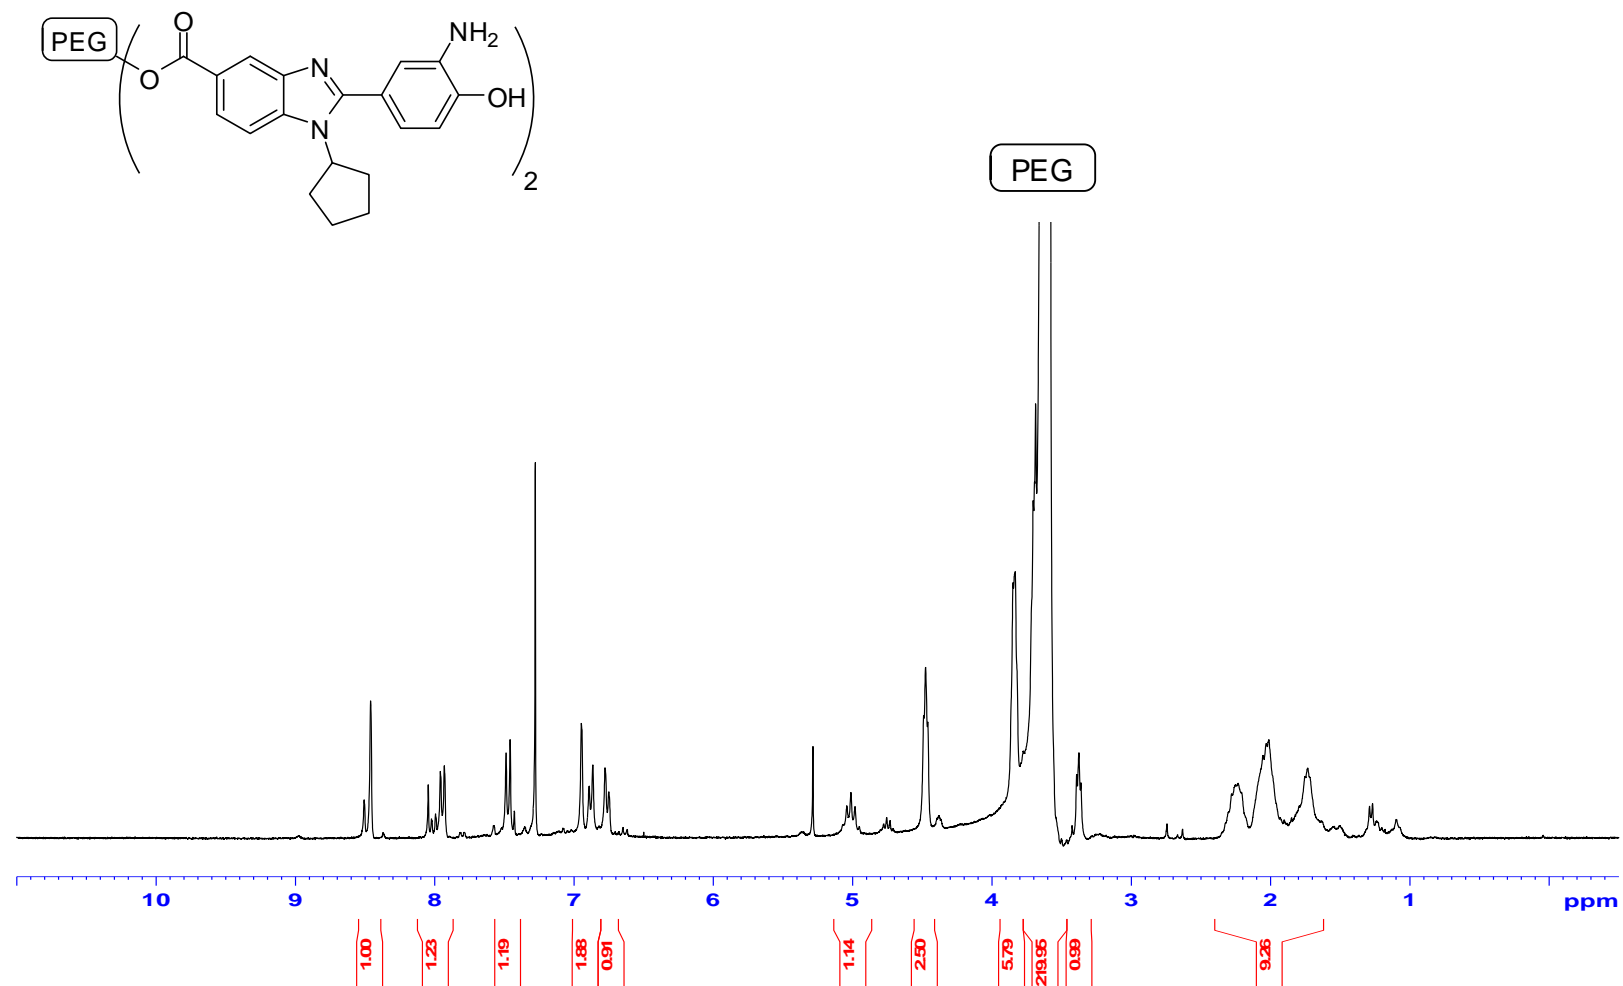

<sup>1</sup>H NMR Spectrum (300 MHz) of compound 13n in CDCl<sub>3</sub>

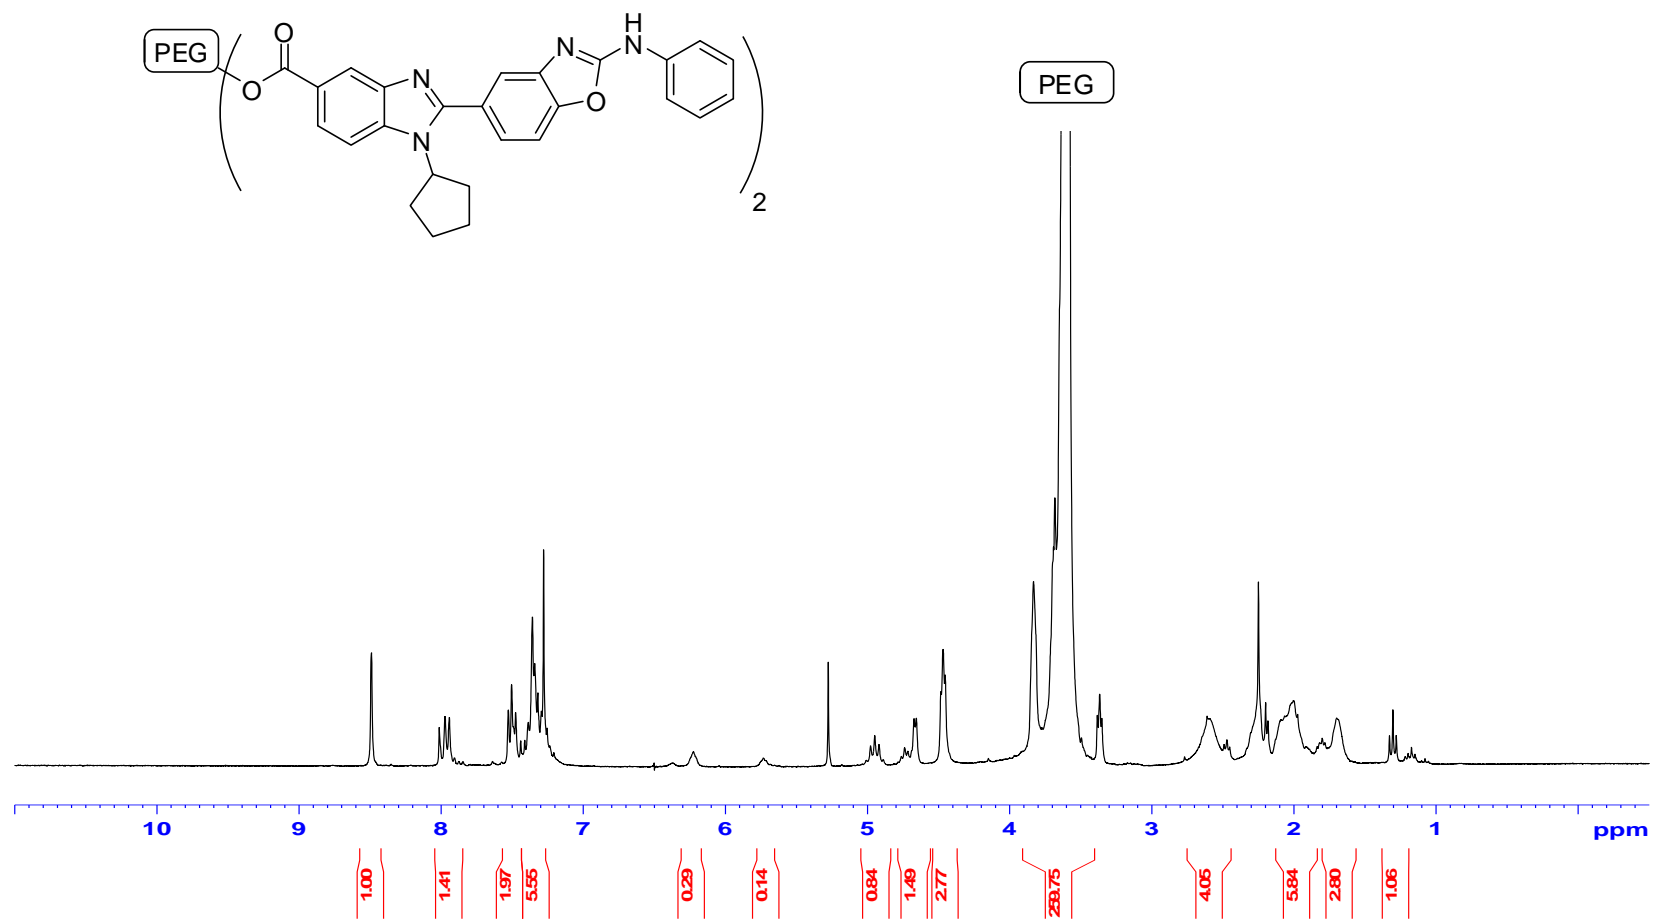

<sup>1</sup>H NMR Spectrum (300 MHz) of compound 14n in CDCl<sub>3</sub>



### Synthesis of Polymer bound 3-(4-Hydroxy-3- nitrobenzamido)-4-(isobutylamino) carboxylates 11a.

Status: OK

Absorption level: Normal

Vial type: 10-20 ml

Pre-stirring: 0

Initial power: 0

Dynamic deflector optimization: Off

Step Time    ?C bar W   FHT Cooling Stir Rate

|   |          |    |     |     |    |    |     |
|---|----------|----|-----|-----|----|----|-----|
| 1 | 00:25:00 | 90 | Off | Off | On | On | 600 |
|---|----------|----|-----|-----|----|----|-----|

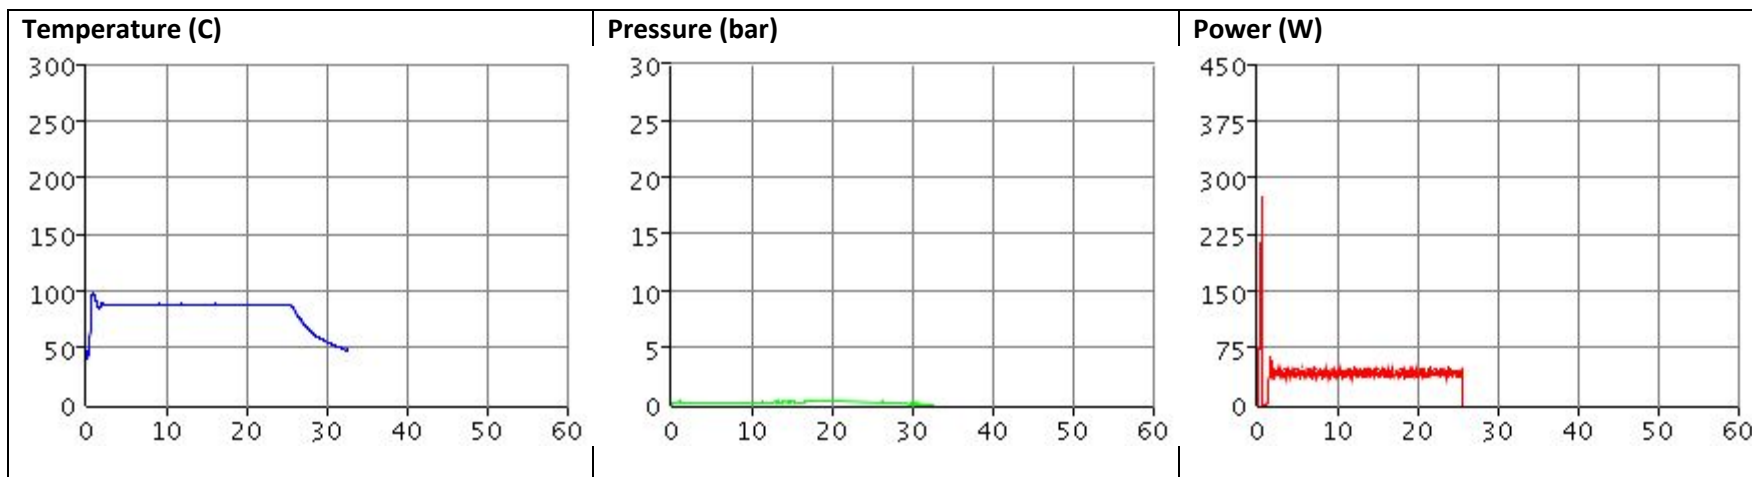

### Synthesis of 2-(4-Hydroxy-3-nitrophenyl)-1-isobutyl-1H-benzo[d]imidazole carboxylates 12a.

Status: OK

Absorption level: Normal

Vial type: 10-20 ml

Pre-stirring: 0

Initial power: 0

Dynamic deflector optimization: Off

Step Time    ?C   bar   W   FHT   Cooling   Stir Rate

|   |          |     |   |     |    |    |     |
|---|----------|-----|---|-----|----|----|-----|
| 1 | 00:08:00 | 100 | 8 | Off | On | On | 600 |
|---|----------|-----|---|-----|----|----|-----|

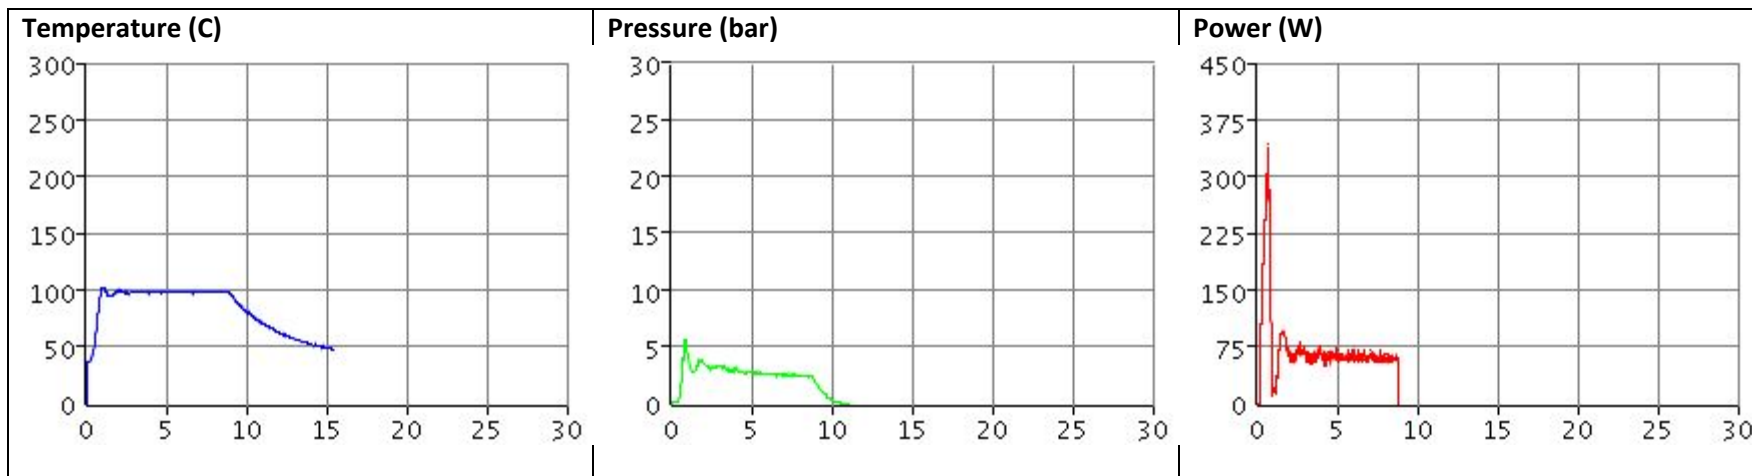

### Synthesis of Polymer bound 2-(3-Amino-4-hydroxyphenyl)-1-isobutyl-1H-benzo[d]imidazole carboxylates 13a.

Status: OK

Absorption level: Normal

Vial type: 10-20 ml

Pre-stirring: 10

Initial power: 0

Dynamic deflector optimization: Off

Step Time    ?C bar W   FHT Cooling Stir Rate

|   |          |    |     |     |    |    |     |
|---|----------|----|-----|-----|----|----|-----|
| 1 | 00:10:00 | 80 | Off | Off | On | On | 600 |
|---|----------|----|-----|-----|----|----|-----|

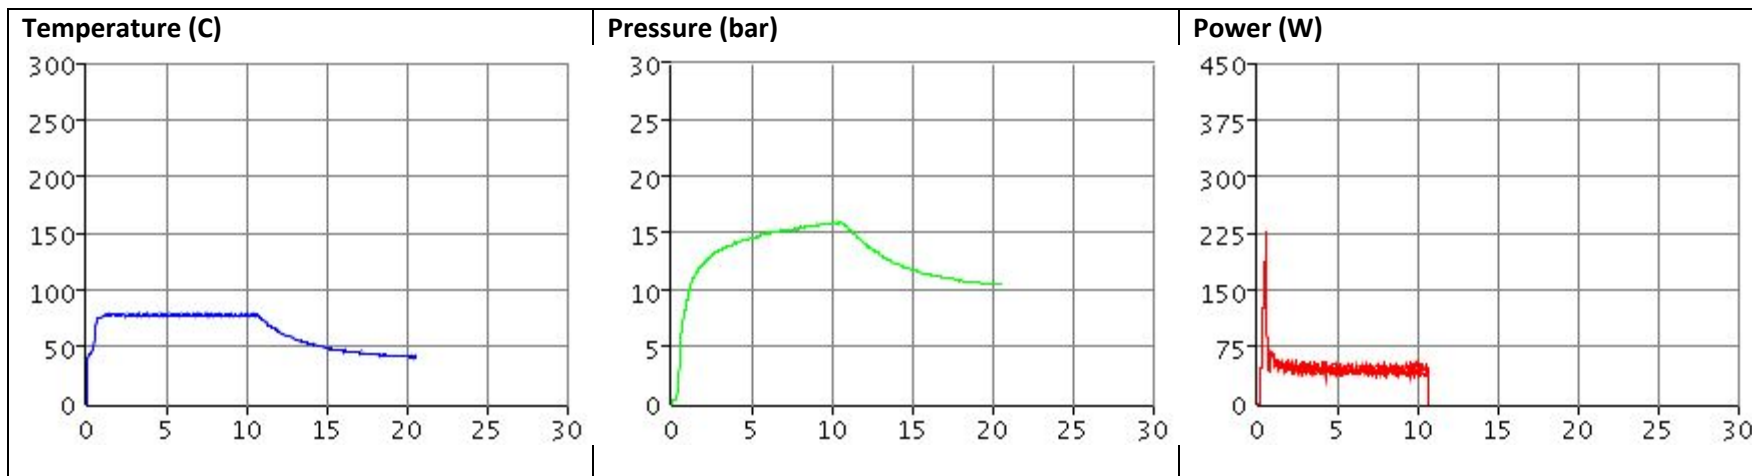

### Synthesis of Polymer bound 1-Isobutyl-2-(2-(phenylamino) benzo[d]oxazol-5-yl)-1H-benzo[d]imidazole-carboxylate 14a.

Status: OK

Absorption level: Normal

Vial type: 10-20 ml

Pre-stirring: 0

Initial power: 0

Dynamic deflector optimization: Off

Step Time    ?C   bar   W   FHT   Cooling   Stir Rate

|   |          |     |   |     |    |    |     |
|---|----------|-----|---|-----|----|----|-----|
| 1 | 00:10:00 | 100 | 5 | Off | On | On | 600 |
|---|----------|-----|---|-----|----|----|-----|

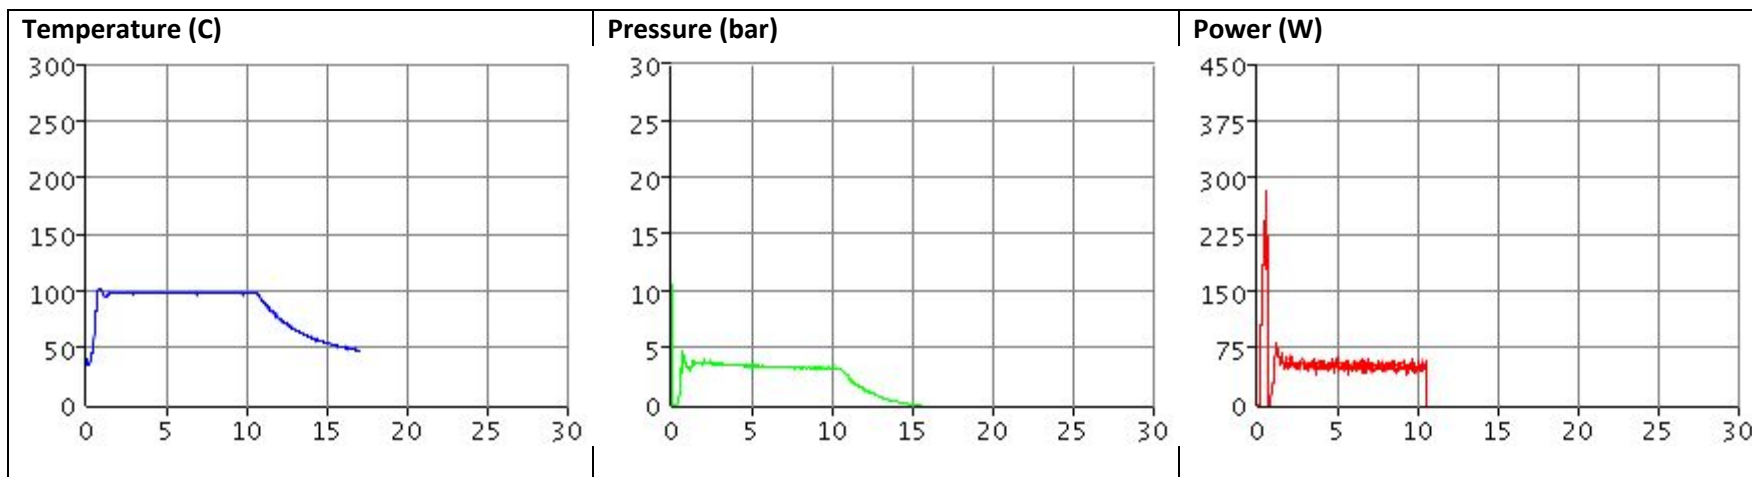

Supplement: c0ob00547a_1.pdf [file c0ob00547a_1.pdf]
