# Supplementary material for: Polymer supported synthesis of novel benzoxazole linked benzimidazoles under microwave conditions: In vitro evaluation of VEGFR-3 kinase inhibition activity
Source: Royal Society of Chemistry journal article supplement (doi:10.1039/c0ob00547a), 2010-12-06
Supplement: c0ob00547a_2.pdf [file c0ob00547a_2.pdf]

## Elemental Analysis of Compound 15n

| 中興大學研發處貴重儀器使用中心                                                                                                                                                                                   |                    |                    |                       |       |       |
|---------------------------------------------------------------------------------------------------------------------------------------------------------------------------------------------------|--------------------|--------------------|-----------------------|-------|-------|
| 元素分析儀 Elementar vario EL III CHN-OS Rapid 服務報告書 NO. 1                                                                                                                                             |                    |                    |                       |       |       |
| NAME: <u>Barnab</u>                                                                                                                                                                               |                    |                    |                       |       |       |
| 使用者姓名:                                                                                                                                                                                            | <u>馬娜莉</u>         | 中心編號:              | _____                 |       |       |
| 服務單位:                                                                                                                                                                                             | <u>交大應化所</u>       | 名稱或代號:             | <u>Kr-B0-15 [15n]</u> |       |       |
| 主管姓名:                                                                                                                                                                                             | <u>孫仲銘</u>         |                    |                       |       |       |
| 收件日期:                                                                                                                                                                                             | <u>99年11月4日</u>    | 完成日期:              | <u>99年11月4日</u>       |       |       |
| 分析結果:                                                                                                                                                                                             |                    |                    |                       |       |       |
| 樣品重量:                                                                                                                                                                                             | 1) <u>3.566 mg</u> | 2) <u>3.516 mg</u> | 3) _____              | mg    |       |
| Weight                                                                                                                                                                                            | N %                | C %                | H %                   | S %   | O %   |
| 實驗值:                                                                                                                                                                                              | 1) <u>11.81</u>    | <u>72.05</u>       | <u>5.68</u>           | _____ | _____ |
| experimental value                                                                                                                                                                                | 2) <u>11.81</u>    | <u>72.00</u>       | <u>5.77</u>           | _____ | _____ |
|                                                                                                                                                                                                   | 3) _____           | _____              | _____                 | _____ | _____ |
| 推測值:                                                                                                                                                                                              | <u>12.01</u>       | <u>72.09</u>       | <u>5.62</u>           | _____ | _____ |
| Calculated Value                                                                                                                                                                                  |                    |                    |                       |       |       |
| 本日所用之 Standard:                                                                                                                                                                                   |                    |                    |                       |       |       |
| ★ <input type="checkbox"/> Acetanilid <input type="checkbox"/> 4-Nitroaniline <input type="checkbox"/> Benzoic acid                                                                               |                    |                    |                       |       |       |
| <input type="checkbox"/> Sulfanilic acid <input type="checkbox"/> 1-Chloro-2,4-dinitrobenzene                                                                                                     |                    |                    |                       |       |       |
|                                                                                                                                                                                                   | N %                | C %                | H %                   | S %   | O %   |
| 理論值:                                                                                                                                                                                              | <u>10.36</u>       | <u>71.09</u>       | <u>6.71</u>           | _____ | _____ |
| 測出值:                                                                                                                                                                                              | <u>10.29</u>       | <u>71.07</u>       | <u>6.63</u>           | _____ | _____ |
| 建議:                                                                                                                                                                                               |                    |                    |                       |       |       |
| 費用核算: C H N: <u>1000</u>                                                                                                                                                                          |                    |                    |                       |       |       |
| O: _____                                                                                                                                                                                          |                    |                    |                       |       |       |
| S: _____    合計台幣: <u>1000</u>                                                                                                                                                                     |                    |                    |                       |       |       |
| 儀器負責人簽章: 鄭政峯  技術員簽章: 陳宜綱  |                    |                    |                       |       |       |
| 報告日期: 99年11月5日                                                                                                                                                                                    |                    |                    |                       |       |       |

## 中興大學研發處貴重儀器使用中心

元素分析儀 Elementar vario EL III CHN-OS Rapid 服務報告書 NO. 1

|                           |                    |                          |                             |                                     |              |
|---------------------------|--------------------|--------------------------|-----------------------------|-------------------------------------|--------------|
| Name: <i>Bornali</i>      |                    |                          |                             |                                     |              |
| 使用者姓名:                    | <u>馬娜莉</u>         | 中心編號:                    | _____                       |                                     |              |
| 服務單位:                     | <u>交大應化所</u>       | 名稱或代號:                   | <u>Kr-B0-15 [15H]</u>       |                                     |              |
| 主管姓名:                     | <u>孫仲銘</u>         |                          |                             |                                     |              |
| 收件日期:                     | <u>99年11月4日</u>    | 完成日期:                    | <u>99年</u>                  | <u>11月</u>                          | <u>5日</u>    |
| 分析結果:                     |                    |                          |                             |                                     |              |
| 樣品重量:                     | 1) <u>2.115 mg</u> | 2) <u>2.105 mg</u>       | 3) _____                    | mg                                  |              |
| <i>Weight</i>             | N %                | C %                      | H %                         | S %                                 | O %          |
| 實驗值:                      | 1) _____           | _____                    | _____                       | _____                               | <u>10.45</u> |
| <i>experimental value</i> | 2) _____           | _____                    | _____                       | _____                               | <u>10.41</u> |
|                           | 3) _____           | _____                    | _____                       | _____                               | _____        |
| 推測值:                      | _____              | _____                    | _____                       | _____                               | <u>10.29</u> |
| <i>Calculated value</i>   |                    |                          |                             |                                     |              |
| 本日所用之 Standard:           |                    |                          |                             |                                     |              |
| <input type="checkbox"/>  | Acetanilid         | <input type="checkbox"/> | 4-Nitroaniline              | <input checked="" type="checkbox"/> | Benzoic acid |
| <input type="checkbox"/>  | Sulfanilic acid    | <input type="checkbox"/> | 1-Chloro-2,4-dinitrobenzene |                                     |              |
|                           | N %                | C %                      | H %                         | S %                                 | O %          |
| 理論值:                      | _____              | _____                    | _____                       | _____                               | <u>26.20</u> |
| 測出值:                      | _____              | _____                    | _____                       | _____                               | <u>26.14</u> |
| 建議:                       |                    |                          |                             |                                     |              |
| 費用核算: C H N: _____        |                    |                          |                             |                                     |              |
|                           | O:                 | <u>1000</u>              | _____                       |                                     |              |
|                           | S:                 | _____                    | 合計台幣:                       | <u>1000</u>                         |              |

儀器負責人簽章: 鄭政峯  技術員簽章: 陳宜絹



報告日期: 99年11月6日
